# Supplementary material for: The Viscum album Gene Space database
Source: Front Plant Sci. 2023 Jun 26;14:1193122. doi: 10.3389/fpls.2023.1193122 (PMC10359728; doi:10.3389/fpls.2023.1193122)
Supplement: Supplementary Data Sheet 1 — Heatmap of abundance profiles of the proteins included in the mitochondrial complexome dataset of V. album re-evaluated using the VaGs II database. [file Table_1.xlsx]

## Sheet: Complexome
Supplementary table S1: Reevaluation of the Complexome Project of Viscum album mitochondria with the c95aS99 database (related to Figure 5). The 1392 lanes refer to the 1392 unique proteins (accessions) identified in this project. For each accession abundance profiles are visible across the 54 fractions (columns) of the 1D Blue native Gel stripe (on top). The fractions are numbered (1 to 54 from …
					3000 kDa					1500 kDa				1000 kDa	900 kDa		700 kDa	650 kDa			500 kDa			450 kDa	420 kDa	400 kDa	350 kDa			210 kDa					160 kDa										110 kDa
Column	1	2	3	4	5	6	7	8	9	10	11	12	13	14	15	16	17	18	19	20	21	22	23	24	25	26	27	28	29	30	31	32	33	34	35	36	37	38	39	40	41	42	43	44	45	46	47	48	49
1	0	0	0	0	427810	0	0	0	0	0	0	0	0	0	0	0	0	0	0	0	0	0	0	0	0	0	0	0	0	0	0	0	0	0	0	0	0	0	0	0	0	386570	0	0	0	0	0	0	0
2	0	341730	0	0	348930	0	0	209640	0	0	0	0	0	0	0	0	0	0	0	0	0	0	0	0	0	0	0	0	0	0	0	0	0	0	0	0	0	0	0	0	0	0	0	0	0	0	0	0	0
3	0	0	0	0	155230	110330	0	462560	245550	0	0	0	0	0	0	0	0	0	0	0	0	0	0	0	0	0	0	0	0	0	0	0	0	0	0	0	0	0	0	0	0	0	0	0	0	0	0	0	0
4	41980	82716	104710	62887	607280	303730	537280	1456800	340450	184640	60708	0	0	0	0	0	0	0	0	0	0	0	0	0	0	0	0	0	0	0	0	0	0	0	0	0	0	0	0	0	0	0	0	0	0	0	0	0	0
5	0	0	0	0	0	0	0	101850	0	0	0	0	0	0	0	0	0	0	0	0	0	0	0	0	0	0	0	0	0	0	0	0	0	0	0	0	0	0	0	0	0	0	0	0	0	0	0	0	0
6	0	0	0	0	0	577140	0	898600	0	0	0	0	0	0	0	0	0	0	0	0	0	0	0	0	0	0	0	0	0	0	0	0	0	0	0	0	0	0	0	0	0	0	0	0	0	0	0	0	0
7	0	0	0	31054	0	58304	40524	103050	0	0	0	0	0	0	0	0	0	0	0	0	0	0	0	0	0	0	0	0	0	0	0	0	0	0	0	0	0	0	0	0	0	0	0	0	0	0	0	0	0
8	0	0	240050	260950	244130	130610	0	617910	0	0	389490	0	0	0	0	0	0	0	0	0	0	0	0	0	0	0	0	0	0	0	0	0	0	0	0	0	0	0	0	0	0	0	0	0	0	0	0	0	0
9	0	1815200	4058600	2458300	2396100	238220	1306700	1175200	946000	0	1233700	0	0	0	0	0	0	0	4275300	0	0	0	0	0	0	0	0	0	0	0	0	0	0	0	0	0	0	0	0	0	0	0	0	0	0	0	0	0	0
10	0	0	587320	788900	554670	206750	234530	0	0	0	0	0	0	0	0	0	0	0	0	0	0	0	0	0	0	0	0	0	0	0	0	0	0	0	0	0	0	0	0	0	0	0	0	0	0	0	0	0	0
11	180510000	530420000	735130000	945670000	843390000	724850000	460130000	162050000	59214000	34307000	32366000	20820000	22317000	21837000	9951300	18341000	4029800	12811000	13384000	10036000	8695900	6854500	8770800	6436700	4910900	2426700	2817400	4302700	1257800	2307300	2185600	3910400	1726200	1175900	1506100	2253200	749510	1022100	1686700	5517900	1440200	4538800	0	193550	0	1052700	1436100	7127000	8116000
12	12026000	37250000	47387000	55786000	59361000	37497000	26886000	10286000	488620	172450	124200	0	92235	0	0	0	0	0	0	0	0	0	0	0	0	0	0	0	0	0	0	0	1308600	0	0	0	0	0	0	0	0	0	0	0	0	0	0	0	0
13	100540	343980	321080	183510	128180	55259	168430	0	0	0	0	0	0	0	0	0	0	0	0	0	0	0	0	0	0	0	0	0	0	0	0	0	0	0	0	0	0	0	0	0	0	0	0	0	0	0	0	0	0
14	0	220780	262100	245030	125990	0	0	0	0	0	0	0	0	0	0	0	0	0	0	0	0	0	0	0	0	0	0	0	0	0	0	0	0	0	0	0	0	0	0	0	0	0	0	0	0	0	0	0	0
15	4474700	11706000	8029700	8660300	2457500	889450	0	0	0	0	0	0	0	0	0	0	0	0	0	0	0	0	0	0	0	0	0	0	0	0	0	0	0	0	0	0	0	0	0	0	0	0	0	0	0	0	0	0	0
16	111330	536800	479660	233640	231180	102740	270840	470070	182160	100600	0	0	386200	0	0	0	0	0	0	0	0	0	0	0	0	0	0	0	0	0	0	0	0	0	0	0	0	0	0	0	0	0	0	0	0	0	0	0	0
17	35669	252240	429850	130980	77370	263320	143500	328360	156130	33183	0	0	0	0	0	0	0	0	0	0	0	0	0	0	0	0	0	0	0	0	0	0	0	0	0	0	0	0	0	0	0	0	0	0	0	0	0	0	0
18	91868	168810	385030	149050	71382	124990	100740	168870	34826	0	0	0	0	0	0	0	0	0	0	0	0	0	0	0	0	0	0	0	0	0	0	0	0	0	0	0	0	0	0	0	0	0	0	0	0	0	0	0	0
19	71383	241330	189490	173210	25256	87770	166660	162360	0	0	0	0	0	0	0	0	0	0	0	0	0	0	0	0	0	0	0	0	0	0	0	0	0	0	0	0	0	0	0	0	0	0	0	0	0	0	0	0	0
20	0	39413	42329	48893	28006	48037	51237	63774	0	0	0	0	0	0	0	0	0	0	0	0	0	0	0	0	0	0	0	0	0	0	0	0	0	0	0	0	0	0	0	0	0	0	0	0	0	0	0	0	0
21	70705	161570	312850	322570	369630	335080	170430	531850	105070	77449	0	0	0	0	0	0	0	0	0	0	0	0	0	0	0	0	0	0	0	0	0	0	0	0	0	0	0	0	0	0	0	0	0	0	0	0	0	0	0
22	140030	689310	743110	712600	679760	347150	339660	694450	311700	76384	0	0	0	0	0	0	0	0	0	0	0	0	0	0	0	0	0	0	0	0	0	0	0	0	0	0	0	0	0	0	416660	0	0	0	0	0	0	0	0
23	187420	276380	1354400	789410	1812000	804060	967230	1787600	1215400	557040	554630	0	0	0	0	274640	0	0	0	0	0	0	0	0	0	0	0	0	0	0	0	0	0	0	0	0	0	0	0	0	0	0	0	0	0	0	0	0	0
24	145860	905420	1755600	1932500	1082200	886010	830530	976010	1354000	1158700	1279000	307820	670940	0	0	0	0	545660	372190	0	0	0	0	0	0	254900	258910	0	0	0	0	0	0	0	0	0	0	0	0	0	0	0	0	0	0	0	0	0	0
25	14971000	40448000	44246000	55152000	44575000	28550000	27133000	23784000	24104000	21037000	18060000	16172000	14402000	13237000	10222000	10159000	11755000	12744000	6973100	14176000	8410300	9028400	10474000	9143400	6313600	10107000	4549000	6999500	8694600	3300400	6930400	6516300	4562300	7199900	5187600	9565400	7721800	9110600	8558300	10953000	9752200	6646400	425380	0	497140	0	582910	663520	316530
26	216790	585880	752030	784580	700060	702110	293540	367830	489390	470050	0	0	0	0	0	0	0	0	0	0	0	0	0	0	0	0	0	0	0	0	0	0	0	0	0	0	0	0	0	0	0	0	0	0	0	0	0	0	0
27	370380	2289000	2344500	2218600	1846700	2139100	2342000	1977400	1567900	1016100	694880	542760	341120	0	0	177290	0	0	230800	0	0	0	435650	0	0	0	0	546980	0	0	0	0	0	0	0	0	0	0	0	0	0	0	0	0	0	0	0	0	0
28	315620	1028200	896780	900250	745590	712760	1095800	1412100	1006400	784950	474700	461950	603470	399710	0	191720	0	652010	247850	541520	312450	0	313680	115530	187670	375150	268230	594130	87309	0	0	0	0	0	0	0	0	0	0	0	0	0	0	0	0	0	0	0	0
29	107820	711950	1081900	1154500	1256400	1534400	2840700	1926800	1138400	362410	272120	227990	0	0	0	0	0	0	0	0	0	0	0	0	0	0	0	0	0	0	0	0	0	0	0	0	0	0	0	0	0	0	0	0	0	0	0	0	0
30	54816	216430	338410	607370	589710	829160	789860	515950	0	0	0	0	0	0	0	0	0	0	0	0	0	0	0	0	0	0	0	0	0	0	0	0	0	0	0	0	0	0	0	0	0	0	0	0	0	0	0	0	0
31	0	7436100	6438500	9439800	0	9490200	14023000	4853600	0	0	0	5043000	0	0	0	3224100	0	0	1821700	0	0	0	0	0	0	0	0	0	0	0	0	0	0	0	0	0	0	0	0	0	0	0	0	0	0	0	0	0	0
32	0	298380	271930	334470	95750	332940	425290	267620	0	0	0	0	0	0	0	0	0	0	0	0	0	0	0	0	0	0	0	0	425380	0	0	464500	0	0	0	0	0	0	0	0	0	0	0	0	0	0	0	0	0
33	0	129870	0	182490	0	152620	0	0	0	0	0	0	0	0	0	0	0	0	0	0	0	0	0	0	0	0	0	0	0	0	0	0	0	0	0	0	0	0	0	0	0	0	0	0	0	0	0	0	0
34	1582600	3028800	2188500	4014100	4186700	5157900	1878600	178450	0	450140	544350	336760	533880	341880	214990	1218300	415890	1505100	1409500	2323000	1651600	2149200	1779900	2076300	1317800	2408400	1689500	3306500	3712200	1289700	3534100	488090	372140	156430	0	0	0	0	0	0	162570	0	241580	0	0	2160600	3873400	829010	0
35	41665	204710	185830	207170	227410	174180	88670	273100	244870	128200	78582	0	0	0	0	214370	0	130140	187040	215510	0	0	0	0	0	0	0	198030	212520	188690	381490	204300	0	0	0	0	0	0	0	0	0	0	0	0	0	0	0	0	0
36	131380000	175790000	94152000	64434000	56743000	34487000	49387000	56203000	54967000	49419000	59098000	55120000	52059000	52270000	37560000	52934000	51769000	67247000	53352000	69609000	53769000	67460000	65503000	57075000	62278000	62996000	32662000	47981000	41221000	40287000	82739000	117380000	103550000	92024000	36787000	49150000	25031000	25758000	21769000	28742000	24927000	39919000	42043000	68641000	75884000	59529000	74933000	75196000	54127000
37	101330	105090	0	0	0	0	0	0	0	0	0	0	0	0	0	0	0	0	0	0	0	0	0	0	0	0	0	0	0	0	0	0	0	0	0	0	0	0	0	0	0	0	0	0	0	0	0	0	0
38	310880	536780	230520	0	0	0	0	0	0	341570	0	0	0	0	0	0	0	0	0	0	0	0	0	0	0	0	0	0	0	0	0	0	0	0	0	0	0	0	0	0	0	0	0	0	0	0	0	0	0
39	0	497480	171720	0	0	0	0	0	0	0	0	0	0	0	0	0	0	0	0	0	0	0	0	0	0	0	0	0	0	0	0	0	0	0	0	0	0	0	0	0	0	0	0	0	0	0	0	0	0
40	0	102090	0	0	0	0	0	0	0	0	0	0	0	0	0	0	0	0	0	0	0	0	0	0	0	0	0	0	0	0	0	0	0	0	0	0	0	0	0	0	0	0	0	0	0	0	0	0	0
41	287490	501070	550630	0	0	0	0	0	0	0	0	0	0	0	0	0	0	0	0	0	0	0	0	0	0	0	0	0	0	0	0	0	0	0	0	0	0	0	0	0	0	0	0	0	0	0	0	0	0
42	123320	248770	411000	0	0	0	0	0	0	0	0	0	0	0	0	0	0	0	0	0	0	0	0	0	0	0	0	0	0	0	0	0	0	0	0	0	0	0	0	0	0	0	0	0	0	0	0	0	0
43	0	46893	108100	0	0	0	0	0	0	0	0	0	0	0	0	0	0	0	0	0	0	0	0	0	0	0	0	0	0	0	0	0	0	0	0	0	0	0	0	0	0	0	0	0	0	0	0	0	0
44	0	35179	46866	0	0	45138	0	0	0	0	0	0	0	0	0	0	0	0	0	0	0	0	0	0	0	0	0	0	0	0	0	0	0	0	0	0	0	0	0	0	0	0	0	0	0	0	0	0	0
45	326170	559040	349360	558060	0	958360	923420	338880	0	366510	310950	344980	369340	0	0	0	0	0	831430	0	872800	1044000	0	0	0	0	0	1120800	0	0	0	0	1111800	0	0	0	0	89368	82609	108430	0	0	0	0	0	0	0	0	0
46	0	0	0	0	348150	170500	393030	0	0	0	0	0	0	0	0	0	0	0	0	0	0	0	0	0	0	0	0	0	0	0	0	0	0	0	0	0	0	0	0	0	0	0	0	0	0	0	0	0	0
47	0	0	0	0	0	0	262450	0	0	0	0	0	0	0	0	0	0	0	0	0	0	0	0	0	0	0	0	0	0	0	0	0	0	0	0	0	0	0	0	0	0	0	0	0	0	0	0	0	0
48	0	0	0	0	0	0	177830	0	128050	0	0	0	0	0	0	0	0	0	0	0	0	0	0	0	0	0	0	0	0	0	0	0	0	0	0	0	0	0	0	0	0	0	0	0	0	0	0	0	0
49	0	0	33656	30916	0	27909	0	295870	260230	74844	0	0	0	0	0	0	0	499010	0	0	0	0	0	0	0	0	0	0	0	0	0	0	0	0	0	0	0	0	0	0	0	0	0	0	0	0	0	0	0
50	0	0	0	0	0	0	0	0	0	0	0	0	0	0	0	0	0	48661000	0	0	0	0	0	0	0	0	0	0	0	0	0	0	0	0	0	0	0	0	0	0	0	0	0	0	0	0	0	0	0
51	0	0	0	0	0	0	0	84132	41125	0	0	0	0	0	0	0	0	237240	0	0	0	0	0	247930	0	0	0	0	0	0	0	0	0	0	0	0	0	0	0	0	0	0	0	0	0	0	0	0	0
52	0	0	0	0	0	34271	0	60229	110300	81992	0	0	87470	131420	0	0	0	213590	105790	0	230150	0	127820	230420	0	0	0	0	0	0	0	226540	0	0	0	0	0	0	0	0	0	0	0	0	0	0	0	0	0
53	0	0	0	0	0	0	0	0	0	107220	0	0	0	0	0	0	0	0	0	0	0	0	0	0	0	0	0	0	0	0	0	0	0	0	0	0	0	0	0	0	0	0	0	0	0	0	0	0	0
54	75070	384780	151330	193140	106820	103500	152240	162800	0	1666500	0	0	0	0	0	0	0	0	0	0	0	0	0	0	0	0	0	0	0	0	0	0	0	0	0	0	0	0	0	0	0	0	0	0	0	0	0	0	0
55	74741	0	0	0	487460	0	701420	0	0	0	1292100	0	0	0	0	0	0	0	0	0	0	0	0	0	0	0	0	0	0	0	0	0	0	0	0	0	0	0	0	0	0	0	0	0	0	0	0	0	0
56	0	0	0	0	0	0	211270	0	0	0	519260	0	0	0	0	0	0	0	0	0	0	0	0	0	0	0	0	0	0	0	0	0	0	0	0	0	0	0	0	0	0	0	0	0	0	0	0	0	0
57	0	0	0	0	0	0	0	116970	0	0	286560	0	0	0	0	0	0	0	0	0	0	0	0	0	0	0	0	0	140550	0	0	0	0	0	0	0	0	0	0	0	0	0	0	0	0	0	0	0	0
58	77194	415710	178910	290820	226620	361730	412500	516610	724320	659600	751740	635610	664450	614290	450040	944830	634610	579100	0	374020	0	268420	255700	273890	256560	1773100	388250	387420	244100	296740	360950	540540	0	0	0	0	0	0	0	536930	475030	0	268640	0	0	0	0	0	0
59	233230	2512900	1885500	2189700	3706200	1659400	3545600	5130100	5058700	4929500	3851200	3486900	3354900	2418100	1087400	4340200	2541200	3106100	2508700	2829000	2220000	4936700	4020900	3080100	1703200	1625600	1439500	2772700	2812900	2584100	614220	2398600	2047200	2159400	593130	1248800	2344400	2120800	842590	652080	696020	0	0	667000	0	0	876580	1777600	1792700
60	263480	571450	522080	666040	692920	643460	849620	1210100	1211300	1206700	1503700	1555100	1441800	1378500	0	0	0	1679200	834940	1309300	1034900	1728500	926290	0	0	1387000	628130	880040	418870	0	573240	0	0	0	0	0	0	0	0	0	0	0	0	0	0	0	0	0	0
61	254420	552760	297880	976710	844000	1102600	1125000	2863600	2437900	2254700	1766100	1700200	1254400	1455600	1565700	2185000	812730	3301200	2284000	1303200	2420400	2330500	1294400	2344500	1354800	1255600	1678700	2867900	471380	935240	1250600	904270	825660	882080	128360	963430	931030	1456300	1426000	1416400	1399400	548460	0	0	0	0	0	0	0
62	17292000	51300000	63503000	78863000	84347000	90199000	127010000	168720000	184110000	164790000	178880000	171850000	169110000	164360000	119960000	141340000	121920000	188920000	140450000	145110000	135520000	141570000	132890000	96733000	103590000	92375000	80909000	105720000	81743000	67725000	99989000	83955000	97200000	81545000	34268000	69864000	84858000	66016000	86519000	69350000	54962000	77581000	100430000	150500000	123180000	56811000	12964000	1331100	1037200
63	153000	920200	661990	2660700	1471100	3005300	3648000	3340500	6941000	4039500	3534100	4241600	5341700	6031000	2647000	4573100	3359700	4379300	2248200	4809700	2961400	4412300	4363600	2964200	2576500	4064300	3184500	5602400	5637700	1810500	3414200	2512000	2735100	550080	0	2119800	1520100	0	1258600	1007000	0	0	0	0	0	0	0	0	868130
64	35674	81222	149670	221880	243890	222710	377190	854600	973330	833730	646680	606200	721550	609770	322710	735520	351880	874920	357260	895720	344740	74089	945110	383310	335640	457870	0	738320	638610	221310	386450	927620	747370	362270	0	0	148800	0	187470	337050	179790	265590	0	0	0	0	0	0	0
65	0	0	0	36084	0	0	68225	168580	394980	186560	339120	143510	373240	157840	0	263480	142180	592730	156710	189370	205130	188440	160420	0	0	0	154150	0	135600	139570	165440	158810	132780	120130	0	0	0	0	0	0	0	0	0	0	0	0	0	0	0
66	112030	267480	584800	825790	444410	501470	417300	1182800	2080800	1598400	2108400	1519200	2091900	1547800	776020	1786200	559790	2394300	1016900	1406900	849900	911490	876960	398340	415780	466670	327670	602420	450850	346070	779020	0	308470	0	0	298480	0	0	311940	681270	413410	534320	496990	0	0	0	0	0	0
67	24708	63096	618520	115830	668360	1966500	2014900	5493700	7676600	8718000	12004000	11453000	5724700	10136000	3503900	10802000	4435600	6367600	2541700	6356000	3660600	3274400	566920	8956700	0	0	0	0	0	0	0	0	0	0	0	0	0	0	0	0	0	0	0	0	0	0	0	0	0
68	2964.2	101100	100820	214610	325220	272460	463620	764930	1121800	1071300	1775700	1225500	1818200	1246100	640400	1601500	271960	622790	93645	0	0	0	0	0	0	0	0	0	0	0	0	0	0	0	0	0	0	0	0	0	0	0	0	0	0	0	0	0	0
69	315430	1446500	1871500	2801500	5268200	6125700	15556000	34710000	65890000	68027000	89126000	70105000	51175000	32679000	24545000	45833000	44780000	55999000	17423000	14213000	7322500	11994000	9415300	3748800	5659700	8264000	6206500	14091000	12463000	10247000	21055000	24573000	19402000	7406300	2575400	5590600	2436600	1532400	1270800	3063900	0	3451000	2435900	3984500	2153700	756600	661540	0	0
70	0	0	1690800	910930	920810	3154300	7601200	16662000	31371000	34192000	40762000	41193000	22459000	17956000	11280000	27721000	34367000	45198000	15908000	9406700	6521400	4684100	5930400	1526600	6823200	5380100	6870700	9870200	7824500	5538500	14758000	17481000	6905100	4352100	0	0	0	0	0	0	0	0	0	0	0	0	0	0	0
71	499020	774880	928620	1137300	1084400	881120	2169000	3034400	3538100	3059700	2656500	3985900	2985200	1825700	753910	2276100	2047000	1427800	2123600	2271200	1765000	1812000	2000600	875560	1119800	760650	636190	1920200	1138700	1033000	974580	834460	1238400	868130	543370	0	720770	0	0	378550	1229800	0	0	0	0	0	0	0	0
72	708020	1506400	2929400	4223400	3691500	4183800	5263500	8329900	9208600	10460000	9982400	11387000	11317000	8327800	4002400	6781000	3430600	8498300	6444000	8473000	3978800	5191400	8486400	2985100	3835200	2064800	2415300	5028200	4365500	3547900	2910400	1066200	1607000	0	0	0	182890	0	0	193140	0	0	354300	376280	0	453730	536420	441440	228170
73	91806	717460	374120	631370	656070	693010	2462100	8170400	6720500	2305300	5991400	8271900	6301900	3955000	3155700	8100700	3009900	9237000	4753000	5318700	2617100	4361300	5521100	3692800	2155700	0	2637600	4830500	3198000	480120	1112800	0	0	0	0	0	0	0	0	0	0	0	0	0	0	0	0	0	0
74	170080	115300	268280	974090	237250	1037200	2017800	2781100	3400500	3798100	4780100	6115300	3697100	1344500	333910	4292300	340510	2491000	1500800	2006600	1663900	1991000	1749100	2107300	1559600	1755000	1885000	3316400	3127700	2079000	2078000	369150	316150	0	0	0	0	0	969300	0	0	0	0	0	0	0	0	1301800	0
75	1876200	6789200	7378500	8819000	16660000	10933000	13815000	18310000	28754000	42898000	53514000	91750000	79530000	101010000	66989000	62534000	29716000	42296000	31290000	42850000	59673000	69989000	52633000	16737000	26686000	27836000	15492000	20296000	18937000	13501000	6865200	9246700	9198100	3466800	0	1368200	0	0	1174600	1142600	0	0	0	0	0	0	0	0	0
76	0	680050	0	754140	0	1281900	2549300	3090600	4075600	4096400	4884000	6176800	4987200	4228900	5296100	6779000	4153500	3483900	0	2134700	1336800	5494900	6577900	0	0	0	0	0	0	0	0	0	0	0	0	0	0	0	0	0	0	0	0	0	0	0	0	0	0
77	0	150780	160500	166240	192830	200550	223420	330650	376210	328120	404590	529020	377480	0	0	669130	0	0	0	421620	0	0	329770	0	0	0	0	305470	0	0	0	0	0	0	0	0	0	0	0	0	0	0	0	0	0	0	0	0	0
78	0	0	0	0	0	101850	190100	207310	206440	227150	271650	371020	265100	0	0	448510	0	352440	552180	370590	0	0	300310	276380	0	0	0	176350	119740	0	0	0	0	0	0	0	0	0	0	0	0	0	0	0	0	0	0	0	0
79	50582	179090	299170	333000	693210	1053200	1620600	2908100	3002000	3378200	2776500	2832800	4203000	3255900	2767200	3701100	3633000	9434600	6300600	9943500	3423400	6959400	6340100	5882100	1787300	3825100	4366900	4213000	728180	0	814350	178550	325530	133350	0	754610	499860	224380	140650	140330	0	0	0	0	0	0	0	0	0
80	0	0	0	83498	0	0	115960	314660	628770	575570	1067200	2051900	2462400	3325200	2396900	6453400	3126300	10529000	5536900	9982600	8185100	13104000	11420000	6492900	3448500	4242200	1664100	3221600	2061600	698550	1964200	978590	1004400	1490300	0	676130	776710	709040	0	0	0	0	0	0	0	0	0	0	0
81	0	0	0	0	0	68227	205460	242200	175240	277990	0	747190	0	0	0	2225600	0	2995200	1331200	1637700	2034900	1629500	943000	0	0	0	0	0	0	0	0	0	0	0	0	0	0	0	0	0	0	0	0	0	0	0	0	0	0
82	0	88231	188770	249140	291660	361520	414410	192770	862880	962950	1532400	1722900	886850	1570100	0	2011500	1246200	4471000	3910700	2901400	2427500	2372900	1809700	476780	0	0	0	0	0	0	0	0	0	0	0	0	0	0	0	0	0	0	0	0	0	0	0	0	0
83	0	45340	31002	34717	103170	119210	94627	230260	233810	280980	156230	171070	129240	144100	0	276780	159250	552750	443440	597100	311780	287870	467170	129200	0	0	109690	122800	0	0	0	0	0	0	0	0	0	0	0	0	0	0	0	0	0	0	0	0	0
84	5544900	16757000	11897000	22392000	23040000	25852000	42785000	62627000	78178000	79813000	105220000	133780000	137910000	169390000	98491000	223380000	214390000	266350000	219190000	287380000	124850000	234930000	168550000	134860000	199590000	53789000	413790	0	487310	0	752780	671010	742130	793600	0	0	0	0	0	648130	585350	0	0	0	0	0	0	987110	0
85	20559	155820	322860	309400	398620	401690	799540	1381600	1986300	1768800	3136100	2526500	3291500	1933300	2662800	7050200	4756200	7053800	2189900	8057700	3998800	2933100	1510100	0	0	0	0	0	0	0	0	0	0	0	0	0	0	0	0	0	0	0	0	0	0	0	0	0	0
86	0	563330	3436700	2840400	5366100	5001300	5264200	16962000	16912000	32146000	29275000	10563000	17198000	10265000	2977700	30168000	19620000	39676000	18500000	15798000	0	0	0	0	0	0	0	2850500	34465000	0	0	0	0	0	0	0	0	0	0	0	0	0	0	0	0	0	0	0	0
87	0	78725	202260	170220	255480	454880	758530	3054900	4675800	5419300	3439600	548690	1107100	2150300	1107700	5103400	8817500	10491000	2269100	474810	0	0	0	0	0	0	0	0	0	0	0	0	0	0	0	0	0	0	0	0	0	0	0	0	0	0	0	0	0
88	0	0	273910	362260	453180	597260	1603700	9365200	14711000	15081000	8521400	4135900	4358600	6051500	7323100	18058000	21627000	28043000	6783500	2200100	0	0	0	0	0	0	0	0	0	0	0	0	0	0	0	0	0	0	0	0	0	0	0	0	0	0	0	0	0
89	0	0	0	0	0	290010	1548300	8394200	9888500	8633500	4589900	2151200	318830	2234500	2600900	11213000	7622200	16884000	928040	0	0	0	0	0	0	0	0	0	0	0	0	0	0	0	0	0	0	0	0	0	0	0	0	0	0	0	0	0	0
90	0	0	0	0	94877	0	401110	2000700	2648500	3132900	954600	0	434880	806370	1136400	1302000	2265100	4122500	0	0	0	0	0	0	0	0	0	0	0	0	0	0	0	0	0	0	0	0	0	0	0	0	0	0	0	0	0	0	0
91	0	140650	184070	441300	292210	576690	1932900	8642900	13426000	14526000	10397000	3326500	3139300	2685900	7433200	11579000	13338000	15453000	3910500	622870	0	0	0	0	0	0	0	0	0	0	205310	0	0	0	0	0	0	0	0	0	0	0	443420	391930	710900	0	1251300	1941000	2491900
92	0	543680	1222500	1983300	1680800	2963000	6335200	30919000	57134000	53710000	57948000	20109000	19049000	16151000	12667000	36972000	44792000	55123000	11522000	3980700	2183700	0	1673900	0	0	0	1549900	1586800	0	0	0	0	0	0	0	0	0	0	0	0	0	0	0	437700	0	0	477080	0	907310
93	250500	941010	1057200	1566400	2132400	2385800	1289400	13528000	25794000	26490000	25347000	3367000	10485000	9278100	2363100	15654000	20703000	26839000	11695000	4332100	0	481390	480030	0	0	0	0	0	0	0	0	0	0	0	0	0	0	0	0	0	0	0	0	0	0	0	0	1509800	0
94	0	315380	308030	503780	480400	665960	538910	2292000	8990900	9328800	4503800	1108700	857260	660190	3596500	3286000	4525400	4668200	0	0	0	0	0	0	0	0	0	0	0	0	0	0	0	0	0	0	0	0	0	0	0	0	0	0	0	0	0	0	0
95	0	0	0	0	0	206480	710570	4708600	13767000	10313000	1205400	396450	8123000	2433600	2081800	8359600	5000900	12594000	6664600	1484700	0	892640	0	0	0	0	0	535230	0	0	0	0	0	0	0	0	0	1209400	0	633040	512450	725890	0	0	0	0	0	1254800	2195500
96	0	0	152620	0	0	666490	385270	2365300	11618000	2841200	1934600	1253800	0	1270100	0	3757700	7238800	5087100	1309900	0	0	0	0	0	0	0	0	0	0	0	0	0	0	0	0	0	0	0	0	0	0	0	0	0	0	0	0	0	0
97	0	0	0	0	47599	48726	76639	82224	947660	340970	207280	268130	0	0	0	198050	0	209130	0	0	0	0	0	0	0	0	0	0	0	0	0	0	0	0	0	0	0	0	0	0	0	0	0	0	0	0	0	0	0
98	0	0	0	400410	249900	1220300	378600	1891000	3652100	1611600	664710	846540	0	1721700	1666200	1509700	0	845670	0	0	0	0	0	1181000	0	0	0	776070	0	0	0	0	0	0	0	0	0	0	0	0	0	0	0	0	0	0	0	0	0
99	35588	0	0	0	0	0	0	212920	880490	889670	75400	787510	0	0	0	0	0	0	0	0	0	0	162470	0	0	0	0	0	0	0	0	0	0	0	0	0	0	0	0	0	0	0	0	0	0	0	0	0	0
100	0	0	0	0	0	0	0	0	311140	347740	0	518950	0	0	0	604020	0	326430	0	0	0	0	0	0	0	0	0	0	0	0	0	0	0	0	0	0	0	0	0	0	0	0	0	0	0	0	0	0	0
101	0	0	0	0	0	47309	0	0	118940	71326	0	0	0	0	0	0	0	0	0	0	0	0	0	0	0	0	0	0	0	0	0	0	22861	0	0	0	0	0	101040	0	0	0	0	0	0	0	0	0	0
102	0	1245100	3026900	3689000	3795400	5712600	3850900	1335300	10839000	11046000	5417100	2355000	0	2081500	0	3347900	0	0	3700400	1144600	0	2515800	6275200	0	0	4266900	8602400	5018100	0	0	0	0	0	0	0	0	0	0	0	0	0	0	0	0	0	0	0	0	0
103	0	0	0	214300	0	190320	363510	0	427980	404070	0	0	0	0	0	0	0	246100	0	348930	0	0	342140	0	0	0	0	0	0	0	0	0	0	0	0	0	0	0	0	0	0	0	0	0	0	0	0	0	0
104	0	0	0	0	0	168400	248660	257520	373850	0	0	0	0	0	0	219930	0	0	0	0	0	0	0	0	0	0	0	0	0	0	0	0	0	0	0	0	0	0	0	0	0	0	0	0	0	0	0	0	0
105	0	0	0	156620	118720	485190	902020	1301700	1089000	197940	387990	0	0	0	0	0	0	0	0	0	0	0	0	0	0	0	0	0	0	0	0	0	0	0	0	0	0	0	0	0	0	0	0	0	0	0	0	0	0
106	0	0	0	0	0	0	197650	251950	240310	0	0	118490	0	0	0	0	0	0	0	0	0	0	0	0	0	0	0	0	0	0	0	0	0	0	0	0	0	0	0	0	0	0	0	0	0	0	0	0	0
107	0	0	0	0	0	0	494190	2707200	5794400	485210	0	0	0	0	0	0	0	0	0	0	0	0	0	0	0	0	0	0	0	0	0	0	0	0	0	0	0	0	0	0	0	0	0	0	0	0	0	0	0
108	0	0	85864	0	0	362510	1082700	8015000	14020000	1075300	0	0	0	0	0	0	0	0	0	0	0	0	0	0	0	0	0	0	0	0	0	0	0	0	0	0	0	0	0	0	0	0	0	0	0	0	0	0	0
109	54981	0	180360	517310	332990	589240	0	565910	1341700	0	0	0	0	0	0	0	0	0	0	0	0	0	0	0	0	0	0	0	0	0	0	0	0	0	0	0	0	0	0	0	0	0	0	0	0	0	0	0	0
110	0	0	163330	165420	209440	0	0	0	516820	0	144330	0	0	0	0	0	0	0	0	0	0	0	0	0	0	0	0	0	0	0	0	0	0	0	0	0	0	0	0	0	0	0	0	0	0	0	0	0	0
111	0	0	0	0	0	0	0	0	1339900	0	997750	0	0	0	0	0	0	0	772080	0	0	0	0	0	0	0	0	0	0	0	0	0	0	0	0	0	0	0	0	0	0	0	0	0	0	0	0	0	0
112	44232	222800	0	199030	0	162270	259690	334190	406730	312720	600690	0	0	0	0	0	0	380510	0	0	0	0	0	0	0	0	0	0	0	0	0	0	0	0	0	0	0	0	0	0	0	0	0	0	0	0	0	0	0
113	0	266300	458680	907660	177830	634320	1199600	884470	1275900	1833600	1135200	874290	1449000	953420	0	0	0	461430	378300	0	0	0	0	0	0	0	0	0	0	0	0	0	0	0	0	0	0	0	0	0	0	0	0	0	0	0	0	0	0
114	0	209540	241040	304820	286530	307900	450300	663960	872160	580450	1227900	191610	422930	0	0	230970	0	0	0	0	0	0	0	0	0	0	0	0	0	0	0	0	0	0	0	0	0	0	0	0	0	0	0	0	0	0	0	0	0
115	21226	58011	72606	85680	79824	129740	269780	342210	260220	299580	352720	155500	219470	0	210600	194500	0	0	144510	222970	0	0	0	0	0	0	0	0	0	0	0	0	0	0	0	0	0	0	0	0	0	0	0	0	0	0	0	0	0
116	112890	351830	334870	345710	418950	448050	498560	742490	707560	559340	737570	798740	820230	0	0	0	0	0	0	0	0	0	628330	0	0	0	0	0	0	0	0	0	0	0	0	0	0	0	0	0	0	0	0	0	0	0	0	0	0
117	0	138940	300720	176170	135670	0	257420	317240	327870	322930	406880	377030	462430	0	0	0	0	447120	0	0	0	0	487270	0	0	0	0	0	0	0	0	0	0	0	0	0	0	0	0	0	0	0	0	0	0	0	0	0	0
118	0	141610	198510	256510	186840	251500	405290	480080	538730	452030	655300	814960	1223700	0	0	0	0	462670	0	511280	0	575180	0	0	0	0	0	0	0	0	547040	0	0	0	0	0	0	0	0	0	337540	0	0	0	0	0	0	0	0
119	0	333750	481290	1072600	924750	1096200	1793700	3898900	5417600	5975400	8927700	11246000	8518100	4521400	0	1115800	0	0	0	0	0	0	0	0	0	0	0	0	0	0	0	0	0	0	0	0	0	0	0	0	0	0	0	0	0	0	1646800	2790200	2918700
120	0	0	0	259800	227650	0	532250	575800	721270	532040	809260	1241200	0	0	0	0	0	0	0	0	0	0	0	0	0	0	0	0	0	0	0	0	0	0	0	0	0	0	0	0	0	0	0	0	0	0	0	0	0
121	40854	505410	552100	382040	418310	418180	897050	1279000	1025900	696490	985750	586520	229510	252140	0	0	0	191830	166350	0	0	0	146920	0	0	0	0	0	201830	0	398440	482880	432860	937190	0	0	2023000	0	0	0	0	0	0	0	0	0	237940	0	0
122	0	0	613040	758950	0	0	162280	851120	1505300	1618000	726790	0	0	0	0	0	0	0	0	0	0	0	0	0	0	0	0	0	0	0	0	0	0	0	0	0	0	0	0	0	0	0	0	0	0	0	0	0	0
123	0	0	0	118440	92061	110520	144070	220370	233010	258520	380440	0	0	0	0	0	0	0	0	0	0	0	0	0	0	0	0	0	0	0	0	0	0	0	0	0	0	0	0	0	0	0	0	0	0	0	0	0	0
124	0	0	0	0	0	0	0	511740	988090	1043800	747950	0	0	0	0	0	0	0	0	0	0	0	0	0	0	0	0	0	0	0	0	0	0	0	0	0	0	0	0	0	0	0	0	0	0	0	0	0	0
125	0	0	0	0	0	0	0	379640	972540	668720	486490	0	0	0	0	0	0	0	0	0	0	0	0	0	0	0	0	0	0	0	0	0	0	0	0	634120	0	0	0	0	0	0	0	0	0	0	0	0	0
126	0	0	116720	263990	285970	302620	435060	756020	972010	905440	581480	169360	314080	0	0	0	0	0	0	0	0	0	0	0	0	0	0	0	0	0	0	0	0	0	0	0	0	0	0	0	0	0	0	0	0	406200	645650	728030	421320
127	0	2576200	3002400	0	2542300	1933500	0	2910400	2876600	3234300	5321400	0	3737400	3855300	0	0	0	0	0	0	0	0	0	0	0	0	0	6256700	1107500	0	0	0	0	0	0	0	0	0	0	0	0	0	0	0	0	0	0	0	0
128	0	62878	85696	97224	65145	0	122940	255470	138560	238650	292690	0	186060	242530	0	0	0	0	89270	198430	0	0	0	0	0	0	0	153850	0	0	0	0	0	0	0	0	0	0	0	0	0	0	0	0	0	0	0	0	0
129	1816600	5932400	5209300	1051400	8170000	853810	1376300	7273500	9958800	8865000	9398700	4697600	4851200	4647400	4805300	1281300	6165900	5244700	12344000	7543200	0	0	0	0	0	0	0	0	0	0	0	0	0	0	0	0	0	0	3168000	0	0	0	0	0	0	0	0	0	0
130	0	0	0	104170	62193	42068	228030	801210	503360	1003100	846840	286160	196300	0	0	386210	0	0	833480	0	0	0	290630	0	0	0	0	0	0	0	0	0	0	0	0	0	0	0	0	0	0	0	0	174280	0	0	0	0	0
131	0	37446	73562	197050	57089	137090	177220	535450	144500	370530	644910	103530	345850	0	0	158620	156630	0	0	0	0	0	0	0	0	0	0	0	0	0	0	0	0	0	0	0	0	0	0	0	0	0	0	0	0	0	0	0	0
132	0	0	0	0	127010	116720	0	555380	0	307800	294220	0	323470	0	0	167730	0	0	0	0	0	0	0	0	0	0	0	0	0	0	0	0	0	0	0	0	0	0	0	0	0	0	0	0	0	0	0	0	0
133	0	162420	0	165950	245570	237480	398810	485830	413170	498210	527060	535030	645000	440590	0	442850	0	499140	0	425560	0	0	0	0	0	0	0	0	0	0	0	0	0	0	0	0	0	0	0	0	394360	0	0	0	0	0	0	0	0
134	0	0	91549	548820	446150	700740	1170700	1135200	917680	1040600	1153700	1410300	751500	585350	0	0	0	1304900	0	890150	0	0	0	0	0	0	0	0	0	0	0	0	0	0	0	0	0	0	0	0	0	0	0	0	0	0	0	0	0
135	0	259000	233930	490100	344910	388320	700050	786070	941500	730560	825970	607230	593040	475870	0	0	0	634990	528810	892460	242530	138990	213140	271020	0	0	0	0	0	0	0	0	0	0	0	0	306910	0	0	230910	0	0	0	0	0	0	0	0	0
136	49542	483920	322200	678000	503850	408300	1050700	1485900	1309800	1900100	1915500	885920	1385200	640180	229960	645670	397330	869320	567790	1651900	317750	381670	712560	0	0	0	0	0	0	0	0	0	0	0	0	0	0	0	0	0	0	0	0	0	0	0	0	0	0
137	0	523130	374620	353540	445790	396460	559820	1012100	1359900	814320	1214600	770470	731630	290040	0	319940	374180	929460	122270	143820	0	0	88907	0	0	0	0	0	0	0	0	0	0	0	0	0	0	0	0	0	0	0	0	0	0	0	0	0	0
138	280070	1994500	2311000	2663300	2855800	3613100	5780800	7820000	9564800	8351000	8766900	2333100	8809500	3793900	2662300	4988900	5966100	7821400	5265900	4057400	797380	933920	4289700	743080	900010	0	0	0	166010	0	0	0	0	88117	0	723420	0	0	0	0	97764	120630	0	0	0	0	171380	0	0
139	940090	2500800	4326000	5280900	5131000	6518600	9660200	7872800	14572000	8668700	10617000	9539300	9393800	6297700	4898400	11945000	5387000	11191000	4954300	5854600	3476800	2943900	4600700	2785900	1372900	1310100	1763800	3327800	1514400	1061700	2858800	1734800	1950000	1196500	263950	431720	377290	0	199670	263040	144020	0	340670	0	0	414110	0	0	0
140	1222100	3632600	4176400	6083000	6730500	5030900	7180400	8677800	8431900	8035600	9092600	8703900	5578200	4114800	0	3616300	2063000	4006500	4052000	4362100	0	0	2645100	0	0	0	0	0	0	0	0	0	0	0	0	0	1215200	1445200	0	0	0	0	0	0	2015800	0	1693500	2719100	4009400
141	1338400	3670400	5796300	7662600	6749200	5026400	7409200	9083100	8954700	6206100	6742600	5520000	2599200	2809000	2356100	3152800	1291600	3520700	639600	173960	562300	433820	1983300	1318800	425690	0	0	1217000	456410	383850	239880	0	401340	0	0	0	0	351820	0	821500	592700	1024800	0	466230	0	0	0	0	0
142	952150	2835800	4464500	6124700	3691300	6215800	7319200	8859500	9209900	7494100	8187400	7409200	2270300	1596300	1669800	2269300	467810	614760	620630	779980	0	0	51008	0	0	0	0	0	0	0	0	0	0	0	0	0	0	0	0	0	0	0	0	0	0	0	0	0	0
143	1631700	4125800	5243600	7836200	8240300	6489900	10639000	12477000	12654000	11535000	12899000	9172600	9809200	6607100	2500600	4594400	0	4100700	1857500	1265200	1030300	0	374680	0	0	0	0	0	0	0	0	0	0	0	0	0	0	0	0	0	0	0	0	0	0	0	0	0	0
144	232460	1482800	2060300	2584000	2694500	2419700	4391300	5388800	4980300	4251000	3983400	2155900	2419100	1328500	175000	439490	170080	1617000	961720	1041900	944380	814440	0	0	0	997050	0	702560	0	0	0	0	0	0	0	0	0	0	0	345940	294430	0	0	0	0	0	0	0	0
145	662180	1228500	1825100	1803800	3055700	1395600	4245900	3539300	4196200	3872400	2283600	2582800	1348800	0	762760	895990	0	0	0	0	0	0	0	0	0	0	0	0	0	0	0	0	0	0	0	0	0	0	0	0	0	0	0	0	0	0	0	0	0
146	43580	260120	128830	294450	218630	380240	195040	395520	536090	486280	238420	336220	0	0	0	0	0	276330	0	0	0	0	0	0	0	0	0	0	0	0	0	0	0	0	0	0	0	0	0	0	0	0	0	0	0	0	0	0	0
147	134600	559270	688400	875910	768230	1035700	1075900	1308200	1779300	1281200	1096600	749650	569970	123440	277640	245530	0	985570	131620	714740	0	244090	384300	226150	0	0	267590	241830	295060	153530	0	86414	0	0	0	0	184300	0	0	0	301380	0	432360	464590	984310	0	0	0	0
148	94866	459820	854840	562710	962230	2127700	2807600	5113300	4132600	4723500	3511200	2255600	731550	1307900	213710	301280	0	1889600	331480	0	560220	293200	2168000	841300	1191900	0	1113800	0	0	0	0	0	0	0	0	0	0	0	0	0	0	0	0	0	0	0	0	0	0
149	203880	0	623370	592950	931370	685760	1298800	2192900	2332400	0	2149700	2108900	1750700	0	0	0	0	0	0	0	0	0	0	0	0	0	0	0	0	0	0	0	0	0	0	0	0	0	0	0	0	0	0	0	0	0	0	0	0
150	0	305160	311030	711710	315380	311420	679830	901230	1010100	1200800	1117900	942220	1145800	869010	756330	0	0	0	0	0	0	0	0	0	0	0	0	0	0	0	0	0	0	0	0	0	0	0	0	0	0	0	0	0	0	0	0	0	0
151	10556000	49790000	67879000	73579000	114730000	128690000	186250000	296440000	358700000	398900000	468160000	523230000	407090000	136210000	42637000	47085000	42319000	79946000	67601000	124530000	141080000	86189000	28377000	12596000	20128000	32375000	14733000	8771300	8167200	11843000	9564400	8697900	10073000	7960500	3653800	16813000	65118000	90366000	127580000	209200000	90851000	39947000	16622000	15400000	6841800	0	0	0	0
152	3697400	13405000	19151000	26396000	28185000	29954000	43457000	74998000	92613000	97155000	127770000	131980000	100960000	31446000	9663700	14358000	8933600	17709000	12119000	26087000	21805000	16105000	2519200	980420	489560	0	538370	121760	122080	114700	0	0	0	0	0	0	0	439250	110280	0	0	0	0	0	0	353610	0	0	0
153	6720000	19371000	30240000	35799000	38680000	55040000	82827000	130860000	160750000	135350000	210750000	205040000	129930000	56094000	19904000	26694000	20080000	24227000	5048900	40754000	15978000	17284000	5126600	9596500	12900000	5167100	5703000	0	0	0	0	0	0	0	0	0	0	0	0	0	0	0	0	0	0	0	0	0	0
154	0	0	234280	0	1043000	1257400	729440	11637000	13373000	22071000	30783000	16788000	14522000	4786400	0	3678200	3196900	4095300	4429400	0	0	0	0	0	0	0	0	3190100	2895500	0	4413100	0	2468100	0	0	0	0	0	0	0	0	0	0	0	0	0	0	0	0
155	0	0	0	0	24318	0	40297	128690	233530	365650	542730	430170	285920	0	0	0	0	0	0	0	0	0	0	0	0	0	0	0	0	0	0	0	0	0	0	0	0	0	0	0	0	0	0	0	0	0	0	0	0
156	0	0	0	731120	0	1039100	2438100	4272900	3527400	6389800	7928100	6509600	3840600	0	0	0	0	0	0	0	0	0	0	0	0	0	0	0	0	0	0	0	0	0	0	0	0	0	0	0	0	0	0	0	0	0	0	0	0
157	0	0	0	0	652030	499230	1114500	1639600	2720500	3256800	5246800	5806100	2729100	0	0	0	0	0	0	0	0	0	0	0	0	0	0	0	0	1029600	2516200	0	0	0	0	0	0	0	0	0	0	0	0	0	0	0	0	0	0
158	0	111000	72335	37710	276510	405550	66335	194070	439270	180260	348630	278070	100340	61084	0	0	0	0	67414	0	0	193660	0	117470	0	0	0	0	0	0	0	0	0	0	0	0	0	0	0	0	0	0	0	0	0	0	0	0	109380
159	1101500	6750200	2021400	7176600	4992300	5449000	953590	3977300	2925200	10433000	10634000	7376100	9059700	2039400	1408000	2037000	1436400	1897500	1844300	1894900	1576900	0	0	0	0	0	0	0	0	0	0	0	0	0	0	0	0	0	0	0	0	0	0	0	0	0	0	0	0
160	42462	224580	185870	268240	70378	40687	79803	154030	129070	83591	209780	130290	260780	0	0	0	0	0	0	0	0	0	0	0	0	0	0	0	0	0	0	0	0	0	0	0	0	0	0	0	0	0	0	0	0	0	0	0	0
161	91604	382600	175960	102110	60728	65428	92628	309300	347870	168890	346840	220150	446060	0	0	0	0	0	0	0	0	0	0	0	0	0	0	0	0	0	0	0	0	0	0	0	0	0	0	0	0	0	0	0	0	0	0	0	0
162	0	153640	33912	0	39039	39521	91299	0	0	96196	124410	0	158360	0	0	0	0	0	0	0	0	0	0	0	0	0	0	0	0	0	0	0	0	0	0	0	0	0	0	0	0	0	0	0	0	0	0	0	0
163	1281200	6187700	557410	895140	7294300	709960	6402000	7508900	8119300	9607900	12187000	0	9677000	0	0	0	12909000	6284000	0	4838300	7954100	1897800	0	0	0	0	8277700	0	3191800	0	0	0	0	6340100	4317400	0	0	0	0	0	0	0	0	0	0	0	0	0	0
164	0	0	130660	164080	176910	271030	206080	250160	324280	609320	321330	337710	206730	0	0	0	0	0	0	0	0	0	0	0	0	0	0	0	0	0	0	0	0	0	0	0	0	0	203860	0	0	0	0	0	0	0	0	0	614880
165	251920	375770	503060	1042100	757390	929360	1320900	1611200	1587300	1641100	1832800	1036300	1236800	362080	0	514420	0	960750	369350	434570	0	380830	1311800	0	0	0	0	343250	585230	165420	0	0	283490	289300	0	0	0	0	0	0	229650	0	0	0	0	320070	620790	2628900	2701800
166	150670	1250500	3462500	2316400	2443100	3047800	3649500	6523100	8902500	9282700	12528000	11805000	9635800	3560200	656980	510000	0	939400	1346800	626580	423310	535980	1402900	393150	0	567720	551730	686850	2056600	1995400	2844700	2608700	1579100	2549000	1379200	3587500	5785000	5267600	2710400	2711100	4312000	3833700	3474800	4152900	3281200	2371000	6345000	12557000	10884000
167	0	239050	1302600	403550	1414300	743690	908260	1254100	2468200	858860	1028100	5649800	1605600	1765500	0	0	0	0	0	1600900	0	0	0	0	0	0	0	0	0	0	0	0	0	0	0	0	0	0	0	0	0	0	0	0	0	0	0	0	0
168	52609	0	412250	0	0	0	0	0	0	0	229080	591640	497550	0	0	0	0	0	0	0	0	0	0	0	0	0	0	0	0	0	0	0	0	0	0	0	0	0	0	0	0	0	0	0	0	0	0	0	0
169	0	0	0	0	0	0	0	0	0	971180	2043900	2989200	2335900	865080	0	639200	0	865120	0	487240	0	0	0	0	0	0	0	0	0	0	0	0	0	0	0	0	0	0	0	0	0	0	0	0	0	0	0	0	0
170	103850	827070	472750	138320	272150	174280	133050	413390	271430	313990	1006900	1553000	1687700	892410	710010	457750	281690	283230	415580	144620	0	0	0	0	0	0	0	0	0	0	0	0	0	0	0	0	216480	0	0	0	0	0	0	0	0	0	298900	1156800	315530
171	0	272520	0	0	407810	0	0	0	234160	146800	319550	906750	1022300	740450	0	0	0	0	0	0	0	0	0	0	0	0	0	0	0	0	0	0	0	0	0	0	0	0	0	0	0	0	0	0	0	0	0	0	0
172	1162300	7031800	9306600	8604300	8015300	5447600	2890600	2877300	3013500	1461000	15970000	21848000	29673000	25611000	7417400	1304500	1076700	1171500	840650	1340100	0	0	0	0	0	0	0	0	0	0	0	0	0	0	0	0	0	0	0	0	0	0	0	0	0	0	0	0	0
173	60558000	202720000	239520000	286660000	253460000	272060000	366240000	687610000	1203300000	1229000000	1863700000	2922000000	4079200000	3908100000	1839500000	1142000000	317640000	344420000	214650000	241510000	161010000	129250000	122440000	76022000	64085000	53731000	29828000	26659000	21921000	11870000	17168000	16129000	17594000	18177000	8225200	16319000	13435000	12770000	11871000	16240000	17396000	25341000	27874000	39758000	32705000	17597000	33687000	36151000	35428000
174	47902000	192950000	236200000	282230000	268700000	312790000	415590000	718150000	1114800000	1287200000	1927100000	2890300000	3910200000	3942400000	2573300000	1649500000	388160000	455790000	274310000	356200000	229720000	207200000	143110000	92378000	93362000	75177000	48544000	58767000	44921000	33227000	50504000	35277000	19234000	35279000	12276000	49569000	27814000	37728000	29261000	31935000	37157000	50503000	63005000	120050000	68291000	41099000	41907000	78904000	97121000
175	0	464200	500130	1487700	2928900	2723500	2153500	1891400	2364100	2697600	4755600	14882000	16264000	22213000	4549800	1204800	3965500	387890	2860300	1577200	0	0	0	0	0	0	0	0	0	0	0	0	0	0	0	0	0	0	0	0	0	0	0	0	0	0	733560	0	2885900
177	0	0	0	0	0	213880	0	0	513520	1498300	1351200	784100	1053300	1660300	0	0	0	590430	0	0	0	0	0	0	0	0	0	0	0	0	0	0	0	0	0	0	0	0	0	0	0	0	0	0	0	0	0	0	0
178	203980	765450	0	1439300	816010	869040	1428100	1504400	0	2567800	4756200	0	12377000	2212800	3151900	0	0	0	0	0	3672500	0	8650800	3249600	3610500	2389500	0	0	1259900	1011700	720000	1155000	0	0	0	0	0	0	0	0	0	0	0	0	0	0	0	0	0
179	8615400	22938000	28746000	47116000	48347000	39438000	36287000	45490000	71591000	80703000	128530000	154160000	262560000	146400000	61216000	83679000	39861000	67487000	41709000	96825000	126150000	153230000	325380000	96851000	149410000	67419000	28570000	73418000	70821000	41125000	72711000	40483000	98825000	83765000	30094000	50581000	68493000	61234000	66884000	19095000	33561000	25953000	26462000	20773000	29851000	35905000	80188000	119740000	111660000
180	661960	12914000	8117800	18320000	27060000	22010000	25477000	39983000	40958000	52412000	87442000	133070000	204430000	152650000	98663000	104470000	65606000	82868000	71938000	99761000	154790000	196250000	132760000	149890000	161430000	138820000	77220000	95643000	93135000	63796000	68906000	49673000	75156000	86223000	14698000	47309000	47768000	45494000	39736000	33761000	16737000	7319700	15478000	7443200	20464000	5588400	22673000	34702000	40442000
181	1597400	4617900	6138100	7230300	14852000	8085600	10154000	12280000	37073000	40973000	66028000	84813000	115650000	102290000	58060000	69421000	49932000	33317000	25579000	49760000	59370000	133690000	67542000	51535000	62674000	47203000	24386000	53843000	18930000	47571000	20056000	0	0	26835000	0	23081000	12436000	12312000	10217000	7175200	4931000	5112000	0	0	0	7558000	0	12071000	12743000
182	0	0	598940	0	391150	706780	937450	1370600	8110900	3367600	6813200	4118400	33428000	7891400	14996000	1893400	0	1225300	0	3432900	9701000	23534000	11932000	6573800	3782200	0	0	0	0	2328000	0	0	0	0	0	0	0	0	0	0	0	0	0	0	0	0	0	0	0
183	0	0	0	0	0	0	0	0	0	0	0	0	123750	0	0	0	0	0	0	0	0	0	0	0	0	0	0	0	0	0	0	0	0	0	0	0	0	0	0	0	0	0	0	0	0	0	0	0	0
184	0	0	0	0	0	0	0	0	595500	0	0	0	0	0	0	656490	1301000	0	0	0	0	0	0	0	0	0	0	0	0	0	0	0	0	0	0	0	0	0	0	0	0	0	0	0	0	0	0	0	0
185	0	0	0	0	0	913370	653430	556850	0	654400	1021300	0	0	3332400	3814700	3756100	6962800	0	0	2594000	0	0	0	0	0	0	0	0	0	0	0	0	0	0	0	0	0	0	0	0	0	0	0	0	0	433490	574880	969800	1022900
186	406370	711400	1910900	3105200	3840200	5284400	4720500	12751000	15583000	17516000	39740000	50011000	71525000	67848000	70904000	170910000	217180000	169070000	16603000	11815000	11861000	11252000	11131000	6338000	4402800	1656000	0	1637000	1796800	902350	1137200	1216200	2351400	857760	245180	703310	2290600	991220	1721300	1375900	1903800	2209300	2314000	3499800	769840	2473300	1813700	15949000	21548000
187	228990	2081200	2438300	3784000	3759500	4256600	9129500	23908000	34236000	43112000	52595000	86071000	114230000	140960000	131030000	332130000	519160000	397490000	84930000	133640000	91382000	176670000	149790000	154370000	49949000	29208000	8883400	4140100	471220	0	528240	0	454180	0	0	0	0	597620	667830	1393700	1247600	471350	624010	1000400	220490	338550	10926000	49281000	72499000
188	0	0	0	59102	89012	50677	105930	276570	523510	621880	648350	1648900	3653100	5379600	15469000	95874000	916900000	621680000	12796000	15514000	11948000	17190000	12117000	9412100	18894000	26445000	6395700	7739600	6916000	7211800	10134000	7810700	11858000	7198100	2043000	8045100	7121800	5492200	7654400	10367000	14974000	34053000	34228000	51261000	67316000	30157000	29476000	9652400	0
189	0	0	0	0	0	0	0	0	0	0	386400	557580	2664800	4211500	12604000	83360000	854470000	695810000	12138000	9136700	6205400	7493700	10450000	6349600	6223300	6483500	5798500	9624500	6533600	3739700	7893000	3869800	5692400	2023400	1249700	2296400	1585400	1862100	5810900	26619000	40273000	43093000	56403000	62513000	18987000	2442500	525400	0	0
190	1519400	6309600	7106900	8844900	5663400	4708800	3482600	4229500	4831400	5718000	11545000	21182000	29416000	70016000	66175000	34239000	58157000	3269500	2863800	4423300	3555000	7810500	7071600	9116200	12903000	20408000	18398000	30028000	68559000	71189000	62865000	17216000	9356600	0	0	0	0	8197700	12446000	19160000	13396000	19469000	19093000	27430000	25409000	13690000	14741000	11762000	8880300
191	389840	3293000	3266900	3362800	3648400	1022800	3752900	1522400	11169000	18694000	31177000	5433300	29846000	54837000	117580000	2225500	34464000	1270600	1917000	2589000	0	5013200	13534000	11104000	15065000	7987500	10472000	9847900	21894000	62739000	144680000	56996000	1168800	0	0	0	0	0	0	0	0	0	0	0	0	0	6000300	7874800	12366000
192	755940	2015300	2277000	2175800	2092900	1563400	2267300	3915500	6826100	9521100	17241000	29290000	75271000	17047000	390480000	67569000	255580000	12674000	0	3102100	2889300	3667700	7474900	7063800	10073000	18539000	18340000	9812200	24470000	30047000	181060000	84827000	13703000	3951800	0	0	0	0	0	0	0	0	0	0	0	0	0	0	0
193	1250700	3629200	3733500	221910	3445800	4185400	4721100	8654800	12509000	22121000	44466000	41455000	124160000	193170000	647210000	185020000	266580000	62485000	5691800	2070500	4089300	6561400	13406000	10235000	9379500	8217100	40424000	32860000	60402000	105820000	297450000	89242000	29215000	5984600	9739200	10412000	14124000	2936700	783130	0	3563800	3003300	3775500	3666300	0	4783700	4116700	5981700	4509600
194	374930	1235900	2362100	1635600	1796400	1285000	2033000	3117000	8568900	11265000	22165000	34985000	58827000	91231000	230010000	33259000	112320000	6978300	1478800	3484200	3418200	4527100	7159600	6546800	6336000	2862700	2698700	18707000	33921000	53195000	140010000	34315000	6000400	4474400	1409300	2247600	2973700	0	2621200	0	0	3075500	2802900	0	0	0	2259900	2647100	1845900
195	0	352840	569410	362360	634700	200330	1005000	1710300	3192900	3299900	6484800	13548000	15038000	35619000	73597000	16389000	45935000	2140900	1295200	2709200	2174800	3249400	3072500	2603000	5572200	6508400	4191700	9797600	14448000	15749000	35328000	17205000	4512200	3003500	0	0	2133500	1990300	5028100	3112800	4100200	1650000	1657100	3257000	1718100	0	0	0	0
196	3678000	11515000	13179000	12775000	10538000	11551000	19204000	41138000	50257000	90192000	181200000	516170000	569130000	1538800000	3284000000	917190000	1956000000	248370000	17538000	24899000	35068000	48047000	47580000	29473000	90853000	153640000	211800000	253400000	335930000	771260000	1532600000	873600000	176980000	142540000	56389000	146590000	56976000	36367000	8618900	4882800	2733100	4572600	2402500	4451800	4592500	0	3920700	5488700	6270200
197	0	3282000	2986500	4275400	3228400	4190100	5744000	12342000	14111000	17807000	52999000	119710000	167650000	388590000	904380000	298020000	540750000	77131000	5753000	7302000	6978900	12416000	16292000	21259000	25779000	41401000	60931000	72143000	95082000	238050000	506550000	263950000	60960000	32656000	18614000	33961000	28091000	14587000	0	0	0	0	0	2866300	0	0	0	2634200	0
198	10114000	28689000	41582000	46456000	40670000	26958000	59062000	107240000	164250000	185570000	402620000	879190000	1380200000	3022200000	6719900000	1932100000	4545100000	594150000	41065000	55130000	70571000	131630000	132380000	119450000	50883000	382150000	498490000	578670000	705000000	1548100000	3743400000	1967400000	332220000	236130000	107400000	85098000	136160000	72497000	21994000	7963600	4760000	0	8661700	9112800	7637700	5296000	9296300	19913000	22209000
199	0	3251000	4317800	4684700	2549900	1652400	10188000	13024000	13800000	30249000	67177000	116490000	231170000	545440000	1377400000	351110000	818030000	38357000	1451000	12521000	4441200	7136700	30882000	25394000	37991000	62609000	48665000	86026000	79300000	141360000	712810000	239660000	44495000	13952000	0	0	1347600	0	2579400	6504500	0	9161800	14322000	7358900	3567600	17010000	17058000	8056900	26059000
200	958360	2787200	2905900	4124400	2600300	2544900	2066000	4021000	9221400	8404800	29197000	71462000	113750000	218110000	418580000	146380000	263690000	43592000	2706500	3369600	3617800	5429800	17852000	7612100	8492100	14910000	32836000	46305000	35599000	103070000	316080000	93091000	38111000	12397000	13854000	25884000	31790000	30340000	26928000	22539000	8605100	14579000	10137000	5378400	3515000	1867800	1500400	0	0
201	0	539640	0	0	905480	436050	638390	1502700	2156500	3202900	7125200	11118000	27124000	47368000	86440000	25703000	81537000	4194800	0	0	0	0	1898200	0	0	4320100	5322100	4142400	4016000	11647000	55305000	21025000	2969100	0	0	0	0	0	0	0	0	0	0	0	0	0	0	0	0
202	437730	1612900	2494500	2800800	2031200	1165300	2007900	5674800	6561500	14301000	24805000	20037000	68627000	178010000	336320000	111100000	222240000	15675000	1554700	3377500	2830400	5104800	13614000	6615900	19146000	16082000	20078000	29172000	36606000	23074000	126350000	41843000	9944900	26587000	2832700	1954300	1553500	1334500	0	0	0	0	0	0	0	0	0	0	0
203	0	0	0	0	0	0	0	0	0	0	0	603370	954360	4119400	4479400	1595200	3418100	0	0	0	0	0	0	0	0	0	0	0	840360	1592800	1770900	0	0	0	0	0	0	0	0	1155300	0	0	0	1815800	2647300	1972500	0	0	0
204	0	0	0	0	0	0	0	0	0	0	0	0	0	6994600	5453000	0	5789700	0	0	0	0	0	0	0	0	0	0	0	3337100	3693500	2943200	0	0	0	0	0	0	0	0	0	0	0	0	0	0	0	0	0	0
205	107800	373960	222630	238580	170460	239820	454740	718890	927140	1016900	1481900	3251700	7368500	10628000	39263000	21802000	55289000	7316800	1293400	2427600	7047000	0	0	0	0	0	0	0	0	0	0	0	0	0	0	0	0	0	0	0	281890	0	0	0	0	0	0	0	0
206	1764200	6494200	10130000	10192000	13590000	15369000	19055000	54753000	97876000	91534000	182130000	603290000	700680000	1561900000	3270400000	1377800000	6648500000	509080000	122210000	294820000	1650400000	3881000	969660	0	0	0	1198500	5539600	8366600	16170000	7336700	989570	1349700	2555600	748820	0	0	0	0	0	0	0	0	0	0	0	0	0	0
207	4685100	13026000	14272000	16756000	11784000	12266000	22100000	51471000	79079000	106340000	199570000	437930000	547200000	1273800000	1939100000	1017000000	2597100000	585510000	119970000	276420000	1148100000	25260000	0	0	0	12557000	10662000	17457000	26817000	22376000	20747000	18824000	26911000	30368000	27724000	49447000	73668000	49355000	0	0	3828600	0	0	0	0	0	0	0	7951700
208	8510600	24261000	25831000	32792000	32734000	22987000	48972000	88302000	144980000	186010000	386610000	794080000	1047900000	1976900000	4613800000	2342300000	4937600000	899140000	186930000	462090000	2200100000	8839400	4577600	5250200	5308300	0	0	20588000	40974000	27405000	15102000	11490000	32241000	16125000	14324000	25732000	131880000	79461000	19089000	9526700	2228500	0	0	0	0	0	0	0	0
209	3032700	9672600	11696000	10859000	11465000	14847000	19015000	58525000	77908000	126170000	184080000	482800000	759100000	1435700000	2716200000	1340200000	3645800000	522630000	71766000	245360000	1306700000	813770	464930	0	0	0	0	0	0	0	0	0	0	0	0	0	0	0	0	0	0	0	0	0	0	0	0	0	0
210	1558700	6307200	7325800	7757100	8161800	8625300	15193000	25357000	44603000	61883000	93117000	152330000	311850000	731380000	1438600000	640250000	1640000000	283380000	48252000	129050000	601970000	2107800	1075600	993540	1725500	1810400	0	1399700	1972100	2056900	2247500	1628800	3838800	5237800	2579300	3671100	2307200	2170000	737420	444450	914820	876090	2075500	1017500	2008000	4211700	3873700	7103400	4247800
211	1804000	6708200	8837400	9396600	9585500	10761000	28217000	52079000	101340000	137360000	261070000	538190000	802940000	1640300000	3477300000	1341300000	4155500000	646450000	104310000	248290000	1326300000	11423000	0	0	821530	0	735880	4767100	11180000	14423000	5220700	569690	4952500	4123300	3327100	6045800	83758000	7697900	7381800	10456000	12140000	12117000	25318000	40150000	46928000	48256000	62788000	73548000	37790000
212	2032400	7820900	6923800	10022000	11110000	12385000	20457000	44384000	95142000	129400000	294060000	594070000	924010000	1843000000	4551700000	1691400000	4998300000	615340000	72534000	291660000	1571100000	5019100	161830	583910	775930	3320000	2867900	5744000	14007000	15671000	13546000	1228700	2332700	1063700	0	1575200	82983000	5821900	5228900	12103000	5236100	8400900	10817000	32433000	28785000	26845000	48134000	49312000	29817000
562	335710	946880	732400	772520	928260	1116200	1973900	4122800	5384700	3710500	7946100	8771600	16629000	29033000	86744000	28842000	96517000	15357000	8532700	11559000	23462000	8103600	11894000	9258500	9365900	20583000	14634000	26936000	26987000	18568000	44999000	29640000	35851000	23782000	17470000	47737000	1472700000	94494000	71373000	106460000	79674000	56549000	64811000	111430000	189550000	229590000	333840000	441200000	203500000
216	510170	1515700	1903800	104230	2222400	2960800	3478700	6970800	9952000	12870000	23203000	72379000	75028000	300100000	724980000	238570000	755960000	65238000	18730000	37982000	233200000	5534700	6386600	5786100	7210400	15325000	5487700	16184000	9410100	12270000	35144000	23121000	22019000	19542000	11277000	36046000	1157800000	74710000	56373000	136800000	90335000	131100000	272970000	514940000	532080000	429810000	423530000	417300000	147360000
213	3831800	12227000	13738000	14290000	14839000	17813000	27288000	59380000	138340000	181090000	222710000	564220000	1091000000	973050000	4153900000	1197800000	3861700000	587080000	148090000	205840000	1637700000	12953000	5158900	0	0	0	0	0	5546900	2794700	0	2316800	2249100	2048400	0	2666500	0	0	0	0	0	0	0	0	0	0	0	0	0
214	0	0	0	0	0	0	0	0	0	0	0	2802000	3531600	0	8490200	0	9180100	0	0	0	0	0	0	0	0	0	0	0	0	0	0	0	0	0	0	0	0	0	0	0	0	0	0	0	0	0	0	0	0
176	336140	1454400	1164700	830200	1241400	911510	1944400	5184600	11122000	7361500	12383000	13154000	47722000	106470000	18437000	7476200	7203500	4188800	1851700	2798300	3256000	0	0	0	0	0	0	0	0	0	0	0	0	0	0	0	0	0	0	0	0	0	0	0	0	0	0	0	0
215	0	36089	40332	45637	123480	194660	186130	95968	407660	471440	176790	134930	406240	115870	13532000	452400	288700	1173500	577570	1210600	484900	1029200	1195000	1283600	1296000	172520	50363	1272900	267440	532680	727500	1771100	2349900	2804100	730840	2893500	409510	232010	0	0	0	0	0	0	0	0	0	0	0
217	0	0	0	0	0	0	0	0	0	0	0	0	0	0	0	0	0	0	0	0	3261500	0	0	0	0	0	0	0	0	0	0	0	0	0	0	0	0	0	0	0	0	0	0	0	0	0	0	0	0
218	424390	997450	0	0	0	771430	0	0	1268100	0	0	0	0	0	0	4949900	0	9722400	13282000	303740000	467850000	20431000	12984000	16800000	20599000	18790000	11607000	23074000	19363000	2808000	3752100	0	5596500	0	0	0	0	0	0	0	0	0	0	0	0	0	0	0	0
219	102880	172150	145860	164270	192040	129700	436890	370750	759480	489720	514590	1794300	2559900	2062600	2504600	6504600	5764000	17228000	24838000	581370000	838710000	49342000	48456000	37314000	36135000	36135000	21654000	33288000	15019000	3517400	6583400	6206000	6022600	5715000	3021900	4510100	5441600	4168400	3060900	2926100	4334600	2126400	2793800	3602800	2580500	1955300	2622800	4431000	5022300
220	0	0	0	0	0	0	0	0	0	0	0	0	0	0	0	0	0	2039300	0	90870000	120320000	5047400	0	638850	0	0	0	2229200	4916900	0	4225300	1611200	160090	0	0	0	0	0	0	0	0	0	0	0	0	0	0	0	0
221	0	0	0	0	0	0	0	0	0	0	0	0	0	0	0	0	0	1468300	2379800	86742000	110220000	5204300	5156600	2735400	2945900	2891100	2029400	3574200	0	0	0	0	0	0	0	0	0	0	0	0	0	0	0	0	0	0	0	0	0
222	0	0	0	0	0	0	0	0	0	0	0	0	0	613240	440470	659210	1632600	5831100	9803400	268190000	328250000	15197000	11116000	13427000	9292200	10667000	7436200	13744000	5209000	130600	968120	1248300	791570	0	0	0	0	0	0	0	0	0	0	0	0	0	0	0	0
223	0	0	0	0	0	0	0	0	0	0	0	0	0	0	0	342550	0	0	1977300	168060000	194030000	1929200	0	710930	0	0	0	0	0	0	0	0	0	0	0	0	0	0	0	0	0	0	0	0	0	0	0	0	0
224	141700	98303	452550	219430	379700	94200	565590	579000	749280	575190	1070000	1867000	3993200	3731100	3703500	8835700	8663700	17178000	30372000	669940000	740920000	69576000	66231000	46530000	43332000	42011000	18639000	45080000	18610000	5580500	9117400	8332800	6619500	8265700	2817200	4579000	7658800	5266300	4934600	5426100	3712200	1637600	3150900	844720	2465300	2031700	4282100	3926600	3675200
225	0	0	0	0	0	0	0	0	0	0	0	0	0	0	0	0	0	0	2363700	39508000	49478000	3680100	0	0	0	0	0	3039800	2096400	0	7340300	0	0	0	0	0	0	0	0	0	0	0	0	0	0	0	0	0	0
226	0	0	0	0	0	0	0	0	0	0	0	0	0	0	0	0	0	0	0	304840	0	0	0	0	0	0	0	0	0	0	0	0	0	0	0	0	0	0	0	0	0	0	0	0	0	0	0	0	0
227	0	0	0	0	0	0	0	0	0	0	0	0	0	0	0	501700	606110	17546000	42622000	60155000	1541100	0	0	0	0	0	0	0	0	0	0	0	0	0	0	0	0	0	0	0	0	0	0	0	0	0	0	0	0
228	0	0	0	0	0	0	0	0	0	0	0	0	0	0	0	5420200	6522500	30778000	85279000	99066000	4668900	0	0	0	0	0	0	0	0	0	0	0	0	0	0	0	0	0	0	0	0	0	0	0	0	0	0	0	0
229	0	0	0	0	0	0	0	0	0	0	0	0	0	0	662870	2686700	3789000	15713000	48567000	57030000	8271000	0	0	0	0	0	0	0	0	0	0	0	0	0	0	0	0	0	0	0	0	0	0	0	0	0	0	0	0
230	0	0	0	0	0	0	0	0	0	0	0	0	0	0	0	4432100	0	15199000	41811000	51399000	11030000	0	0	0	0	0	0	0	0	0	0	0	0	0	0	0	0	0	0	0	0	0	0	0	0	0	0	0	0
231	0	0	0	0	0	0	0	0	0	0	0	0	0	0	0	0	0	0	1280100	1528600	595790	0	0	0	0	0	0	0	0	0	0	0	0	0	0	0	0	0	0	0	0	0	0	0	0	0	0	0	0
232	0	0	0	0	0	0	0	0	0	0	0	0	241790	291120	0	0	0	2010400	7567200	9189300	5709100	0	0	0	0	0	0	0	0	0	0	0	0	0	0	0	0	0	0	0	0	0	0	0	0	0	0	0	0
233	0	0	0	0	0	0	0	0	0	0	92074	0	527960	353890	0	0	292600	3162100	6148200	11395000	7514200	0	0	0	0	0	0	0	0	0	0	0	0	0	0	0	0	0	0	0	0	0	0	0	0	0	0	0	0
234	0	0	0	0	0	0	0	0	0	0	0	0	1044500	2038800	0	0	0	7503500	10294000	19107000	14189000	0	0	0	0	0	0	0	0	0	0	0	0	0	0	0	0	0	0	0	0	0	0	0	0	0	0	0	0
235	12233	267390	551760	301500	581900	299030	566200	685960	802410	1087600	1039900	772000	176070	485400	1143600	1969200	2489800	5214000	4753900	11654000	4835200	2293000	1590700	546940	564920	611390	883150	1546400	205480	154690	571470	431840	711280	1333900	978080	3360000	6067000	6687000	4002300	5113500	1748500	0	0	0	0	0	0	0	0
236	0	637040	691440	912230	908660	564920	730100	1232400	1039300	734570	1431800	1508600	1546500	0	0	1547100	3713500	1595600	3812600	0	0	0	0	0	0	0	0	0	527540	0	0	0	0	0	0	0	0	4171200	2046400	0	0	0	0	0	0	0	0	0	0
237	2178800	8964700	5543100	10289000	3742800	6967900	10924000	8036500	6698700	9715500	11707000	6842000	7430800	1545100	2284500	9965400	19712000	13624000	51873000	31801000	1130100	1100000	2556000	5794500	7165700	3130000	611810	0	0	0	0	0	0	0	0	0	0	0	0	0	0	0	0	0	0	0	0	0	0
238	3242300	10686000	10831000	10571000	10976000	16440000	16887000	22646000	18822000	17146000	20360000	0	0	0	8841000	19214000	43672000	32337000	116780000	46562000	0	0	6771200	0	20607000	6572900	0	0	0	0	0	0	0	0	0	0	0	0	0	0	0	0	0	0	0	0	0	0	0
239	7015300	17589000	16999000	25683000	20598000	24393000	33161000	36747000	10013000	8537800	9220400	27825000	14888000	10452000	11815000	15748000	97092000	62729000	227160000	89632000	0	0	0	0	0	0	0	0	0	0	0	0	0	0	0	0	0	0	0	0	0	0	0	0	0	0	0	0	0
240	3713300	9470400	12079000	18698000	14835000	12440000	18645000	18816000	18846000	15300000	21186000	16477000	11659000	6112200	8698200	25502000	48818000	41504000	145470000	57047000	1247900	2130300	6368800	17778000	21643000	3937500	0	0	0	0	0	0	0	0	0	0	0	0	0	0	0	0	0	0	0	0	0	0	0
241	4512100	11778000	11277000	18932000	13085000	15043000	18057000	20969000	20383000	15125000	20116000	16541000	14416000	8163600	10229000	33309000	66613000	36672000	174710000	53996000	1817200	733160	6195400	15291000	14819000	4362600	0	0	0	0	0	0	0	0	0	0	0	0	0	0	0	0	0	0	0	0	0	0	0
242	3035300	7803400	7773500	12124000	10349000	9364900	11142000	12411000	11618000	10298000	13485000	10783000	8165200	7499200	11140000	22718000	46192000	27052000	118290000	35188000	4583300	0	2069500	5375400	5723600	1945700	0	0	0	0	0	0	0	0	0	0	0	0	0	0	0	0	0	0	0	0	0	0	0
243	9088000	23521000	26941000	35290000	36645000	33579000	38044000	46114000	43693000	35048000	45110000	38900000	27591000	29996000	17670000	68533000	157840000	78298000	316140000	119430000	5108500	2181300	10425000	24561000	17387000	0	0	0	0	0	0	0	0	0	0	0	0	0	0	0	0	0	0	0	0	0	0	0	0
244	6619800	27571000	32066000	31970000	34534000	43085000	43374000	66083000	56825000	43433000	38513000	44023000	33071000	29272000	35607000	73938000	196330000	95145000	371060000	110520000	0	0	0	0	0	0	0	0	0	0	0	0	0	0	0	0	0	0	0	0	0	0	0	0	0	0	0	0	0
245	5055100	13942000	15639000	22992000	11212000	13465000	20941000	26396000	24619000	20576000	27942000	25010000	15696000	16209000	15707000	41181000	79118000	51981000	164780000	58820000	0	0	0	0	0	0	0	115220	639770	0	0	0	0	0	1561900	0	1851700	9250200	19408000	2425100	0	0	0	0	0	0	0	0	0
246	513210	1479800	2041200	4649500	2901600	1528600	1978500	3561500	4935400	1614400	4643800	4262800	1493600	1410400	2763200	4634800	9645200	2850600	37419000	5625100	0	0	0	0	0	0	0	0	0	0	0	0	0	0	0	0	0	0	0	0	0	0	0	0	0	0	0	0	0
247	1360400	3489600	3712400	6535300	5659600	3322200	7285200	16859000	7583800	5704600	10335000	8268500	2312700	2862200	0	6848100	13978000	12082000	73283000	24104000	0	0	3436300	6594900	11798000	0	0	0	0	0	0	0	0	0	0	0	0	0	0	0	0	0	0	0	0	0	0	0	0
248	0	5785700	7640800	0	5866800	7132500	0	12241000	11475000	10348000	11645000	8777800	0	0	0	16369000	6722300	2303700	78501000	25249000	0	0	0	0	0	0	0	0	0	0	0	0	0	0	0	0	0	0	0	0	0	0	0	0	0	0	0	0	0
249	0	0	0	0	0	0	0	0	0	0	0	0	0	0	0	0	0	0	2456100	0	0	0	0	0	0	0	0	0	0	0	0	0	0	0	0	0	0	0	0	0	0	0	0	0	0	0	0	0	0
250	0	0	0	0	0	0	0	0	0	0	0	0	0	0	0	0	0	0	988900	0	0	0	0	0	0	0	0	0	0	0	0	0	0	0	0	0	0	0	0	0	0	0	0	0	0	0	0	0	0
251	0	0	0	0	0	0	0	0	0	0	0	0	0	0	0	0	0	0	1924000	0	0	0	0	0	0	0	0	0	0	0	0	0	0	0	0	0	0	0	0	0	0	0	0	0	0	0	0	0	0
252	0	0	0	0	0	0	0	0	0	0	0	0	0	0	0	0	0	0	1705200	0	0	0	0	0	0	0	0	0	0	0	0	0	0	0	0	0	0	0	0	0	0	0	0	0	0	0	0	0	0
253	0	0	0	0	0	0	0	0	0	0	0	0	0	0	0	0	0	0	1099700	0	0	0	0	0	0	0	0	0	0	0	0	0	0	0	0	0	0	0	0	0	0	0	0	0	0	0	0	0	0
254	0	0	0	0	0	0	0	0	0	0	0	0	0	0	0	0	0	668340	1043400	0	0	0	0	0	0	0	0	0	0	0	0	0	0	0	0	0	0	0	0	0	0	0	0	0	0	0	0	0	0
255	0	0	0	0	0	0	0	0	0	0	0	0	0	0	0	0	0	0	2445400	0	0	0	0	0	0	0	0	0	0	0	0	0	0	0	0	0	0	0	0	0	1986300	0	0	362220	0	0	0	0	0
256	0	86922	53524	96248	0	0	235360	239180	305940	278210	429990	0	0	0	0	0	0	1194400	1861500	543750	0	0	455330	0	0	1817700	0	0	1119600	0	537960	0	372860	0	0	0	0	0	0	0	0	0	0	0	0	0	0	0	0
257	0	0	0	0	0	0	0	0	0	0	0	0	0	0	0	0	0	296040	566380	0	0	368580	0	495370	0	622760	0	605890	526370	365100	642150	0	551870	0	0	0	688980	0	0	0	0	0	0	0	0	0	0	0	0
258	0	71084	86067	304600	343490	425010	498500	960080	1070200	489290	899180	759430	336010	254940	0	0	0	1215800	272660	605910	0	734640	785070	329760	437230	375460	356390	1125100	192910	954020	490460	367400	784270	0	0	0	356400	1066400	505830	473180	317240	0	0	0	0	0	0	0	0
259	196460	699700	750410	1204600	996780	935570	1619000	2050600	2451300	2353000	3194100	1156400	2962100	1681800	395070	2431700	560680	2519000	2809400	4216600	1587200	3795900	3432100	1345000	662570	501790	964840	3451800	1849700	2357400	3466800	4070400	2981000	2341800	1575900	3170900	1750700	2527200	3774900	3334400	1124700	0	0	0	0	0	800320	928500	991350
260	357090	894640	1851400	1931500	2092800	2545500	3974500	5939400	10256000	7561500	12306000	12059000	13025000	12305000	6638300	13764000	7027800	17427000	10830000	16474000	14430000	12583000	14525000	7309400	13037000	10579000	12081000	11135000	9812600	7781600	12198000	13628000	6603200	5022400	2081900	6110200	5891600	13535000	22723000	3934700	327960	0	0	0	0	0	0	0	0
261	221010	537670	644500	940600	752120	920020	1459500	1827500	2242400	2283300	2669300	1989500	2526600	1196000	2254300	2001500	1521200	2470000	2000000	1191100	793730	3684600	3035600	0	1653100	2279500	1630400	2117800	1660400	862210	2013700	1640400	644070	0	753070	1429300	0	792060	640620	708200	261330	1185100	0	0	0	0	0	0	1304900
262	0	276550	435700	372750	426690	506930	746590	1833800	1964300	1063600	1117200	822400	745450	0	1101500	0	2237700	3477000	2200900	3279700	1446900	3562100	2502000	1368500	1697300	0	2123300	1613500	923630	795660	3541500	2701000	1156600	1144300	0	1844200	1929100	1821200	0	1301900	0	0	799750	0	0	0	789610	0	1784300
263	0	0	72771	0	47128	0	128860	283680	209100	185030	0	78955	0	0	206150	0	0	0	0	350560	0	585200	0	0	0	0	0	0	0	0	0	0	0	0	0	0	0	0	0	0	0	0	0	0	0	0	0	0	0
264	103540	109330	133700	332030	204130	142460	256080	869040	2011300	1727800	2266800	3530300	3948400	4893000	4551300	12137000	18703000	51116000	97029000	392710000	805310000	1083400000	626300000	140500000	19786000	9258400	4565300	7120700	4639800	4857900	10856000	12824000	15550000	14723000	8157500	10459000	12333000	12637000	11546000	14252000	15691000	31187000	42711000	53588000	40346000	23314000	21122000	14848000	1586900
265	0	22236	74024	114140	185160	87169	173810	492850	995990	1723800	1557000	1936800	2991500	2324400	2758500	12020000	19649000	47142000	62478000	368950000	703930000	1008000000	551590000	108420000	13233000	2722800	3481600	5775800	4149700	4512800	6076800	8387900	10321000	5451300	2797000	7887100	7766200	10115000	10065000	12102000	14213000	20342000	31873000	49381000	42201000	30346000	26195000	16155000	367580
266	0	0	0	0	0	0	0	0	0	0	0	0	0	0	0	0	0	1397700	0	0	965370	1978100	0	0	0	0	0	0	457470	0	0	0	0	0	0	0	0	0	0	0	0	0	0	0	0	0	0	0	0
267	0	0	0	0	0	0	0	0	0	0	0	0	0	0	0	0	0	0	1446800	0	0	1779900	0	0	0	0	0	0	0	0	0	0	0	0	0	0	0	0	0	0	0	0	0	0	0	0	0	0	0
268	0	0	0	0	0	0	0	93774	0	0	126690	0	0	0	0	0	0	0	157490	179160	0	286410	220060	0	0	0	0	229520	0	0	0	0	161300	0	0	0	0	0	0	0	0	0	0	0	0	0	0	0	0
269	0	0	0	0	70789	85199	125270	182990	189520	0	0	0	722110	0	0	0	0	0	0	604690	0	774310	908140	0	0	0	0	671900	0	0	0	0	0	0	0	0	0	0	0	0	0	0	0	0	0	0	0	0	0
270	0	0	0	0	0	0	0	0	0	0	0	0	0	0	0	0	0	564080	0	270620	0	325750	742110	0	0	0	0	321280	0	0	0	0	0	0	0	0	0	0	0	0	0	0	0	0	0	0	0	0	0
271	0	0	0	0	0	635970	0	769820	1076300	801950	1186300	0	0	0	0	0	0	3134000	2686900	4522600	3737800	3318600	6659200	0	0	0	0	0	0	0	0	0	0	0	0	0	0	0	0	0	0	0	0	0	0	0	0	0	0
272	0	0	0	0	0	0	0	0	109680	0	0	0	0	0	0	0	0	0	0	384850	0	0	872130	0	0	0	0	0	0	0	0	0	0	0	0	0	0	0	0	0	0	0	0	0	0	0	0	0	0
273	0	0	0	0	0	0	0	0	0	0	0	0	0	0	0	0	0	0	0	0	0	0	917310	0	0	0	0	0	0	0	0	0	0	0	0	0	0	0	0	0	0	0	0	0	0	0	0	0	0
274	0	0	0	0	0	0	0	0	0	0	0	0	0	0	0	0	0	0	0	0	0	0	140770	0	0	0	0	0	0	0	0	0	0	0	0	0	0	0	0	0	0	0	0	0	0	0	0	0	0
275	0	0	0	0	0	0	0	0	0	0	0	0	0	0	0	0	0	302380	249980	787760	236250	970270	4376100	706230	0	0	0	0	0	0	0	0	0	0	0	0	0	0	0	0	0	0	0	0	0	0	0	0	0
276	0	0	0	0	0	0	0	0	0	0	0	0	0	0	0	0	0	0	0	0	0	431700	1057400	0	0	0	0	0	0	0	0	0	0	0	0	0	0	0	0	0	0	0	0	0	0	0	0	0	0
277	0	0	0	0	0	0	0	0	0	0	0	0	209450	0	0	0	0	0	96451	255090	262450	823710	1487600	916060	0	0	0	0	0	0	0	0	0	0	0	0	0	0	0	0	0	0	0	0	0	0	0	0	0
278	0	0	0	0	0	0	0	0	0	0	0	0	0	0	0	0	0	0	1628900	2156800	601910	2757300	4440900	3529600	737860	0	0	0	0	0	0	0	0	0	0	0	0	0	0	0	0	0	0	0	0	0	0	0	0
279	110130	297090	602630	634920	421810	568080	1514300	1730500	3615000	4322400	4943400	6447100	4822100	5878700	6200400	11982000	6423700	20662000	26309000	35319000	25774000	31696000	58821000	71688000	30241000	3739500	0	0	0	0	0	0	0	0	0	0	0	0	0	0	0	0	0	0	0	0	0	0	0
280	0	0	0	0	60155	42979	0	446650	77929	157750	0	210830	194250	210450	500410	2086800	1707100	3979800	6537600	11112000	20006000	28492000	50598000	44764000	38023000	21869000	2122300	0	0	0	0	0	0	0	0	0	0	0	0	0	0	0	0	0	0	0	0	0	0
281	0	0	0	0	0	57292	0	168150	314710	221570	236450	0	173860	0	0	0	0	0	0	0	0	685220	0	0	816630	0	0	265280	324960	192730	0	0	0	0	0	0	0	0	0	239210	0	0	0	0	349420	342170	0	409330	0
282	0	0	0	0	0	0	0	0	0	0	0	0	0	0	0	0	0	0	0	0	0	496670	395420	0	1995500	0	0	0	0	0	0	0	0	0	0	0	0	0	0	0	0	0	0	0	0	0	0	0	0
283	0	0	0	0	0	0	0	0	0	0	0	0	0	0	0	0	0	0	0	0	0	159050	296170	0	1771900	0	0	0	0	0	0	0	0	0	0	0	0	0	0	0	0	0	0	0	0	0	143230	0	201420
284	0	0	0	0	0	0	0	0	0	0	0	0	0	0	0	0	0	0	0	0	0	0	0	2237600	2650000	0	0	0	0	0	0	0	0	0	0	0	0	0	0	141280	0	0	0	0	0	0	0	0	0
285	2119900	5552300	6995300	9930700	9407400	8868100	16516000	12416000	24727000	11517000	34655000	36361000	18457000	24594000	19047000	125360000	95576000	63825000	47474000	166710000	229320000	456760000	975320000	9039000000	7668800000	1293500000	3634600	446010	0	0	1240300	727790	856420	1102300	0	1057700	1160300	1531400	790590	1090400	671630	1801100	2709700	1987100	1712700	916370	0	1668600	1258900
286	1632600	5382100	9932500	9404600	13462000	15489000	21011000	34101000	36236000	31993000	52725000	52740000	48784000	46669000	57333000	211280000	151790000	110740000	100870000	220620000	276050000	621530000	1297100000	10053000000	8408200000	1427600000	3611600	1690900	2662400	476310	879760	593000	347300	0	0	0	696020	507780	1214200	986040	1242600	510310	0	0	0	884170	2500800	2241200	3622200
287	0	0	0	0	0	0	0	0	0	0	0	0	0	0	0	0	0	0	0	0	0	0	2002400	6502800	2341700	0	0	0	0	0	0	0	0	0	0	0	0	0	0	0	0	0	0	0	0	0	0	0	0
288	0	847450	920630	1078800	1085800	866000	2088800	2759100	3175500	4489600	6402500	9912100	10898000	15847000	17007000	39417000	57363000	32497000	27899000	43161000	46070000	63447000	77486000	95608000	87633000	56794000	13395000	7654100	3101700	0	824120	1056700	1737400	2037600	0	4127000	1223200	6099800	2840600	11481000	10198000	18915000	22687000	39461000	48249000	41434000	36761000	39866000	50683000
289	1905800	6135600	5840800	8778200	8965200	10129000	14051000	24909000	35585000	38259000	56181000	76072000	76535000	96945000	49253000	344960000	460290000	446460000	174740000	289390000	314530000	496680000	524100000	590670000	828250000	723160000	303450000	112430000	34922000	11677000	13557000	10256000	12787000	14185000	6971500	4380200	19608000	18694000	38481000	69511000	70811000	37176000	182320000	305990000	537620000	434490000	93409000	241180000	127210000
290	0	0	0	0	0	0	0	1071400	1175500	1112100	2424300	4574500	3475000	7629600	6027900	20905000	57341000	15472000	12844000	21735000	15306000	24203000	14988000	19966000	43435000	40172000	14055000	8593600	2502500	0	0	0	0	0	0	0	0	4645800	5036000	10568000	12207000	0	14856000	30885000	49052000	27191000	23150000	18290000	29233000
291	8648200	15386000	18243000	26473000	21831000	28615000	0	60125000	91878000	111300000	178880000	191600000	220810000	246970000	154960000	510260000	332340000	648780000	391680000	627580000	571890000	739040000	901400000	790280000	902140000	719940000	501520000	317550000	90229000	0	47894000	0	0	35975000	0	0	88953000	111950000	0	216940000	175660000	411590000	488570000	1118700000	1345100000	1201900000	752570000	0	529850000
292	7656900	16304000	23657000	28482000	35306000	42731000	69529000	114700000	202160000	241550000	347090000	462540000	645510000	662010000	763410000	1804100000	2550400000	2338600000	361080000	572210000	707000000	551670000	904440000	1017300000	1409000000	4153000000	4079300000	163560000	118260000	91432000	145910000	115960000	133080000	110370000	59693000	133850000	134130000	100710000	165430000	280280000	391840000	813150000	1060800000	1781800000	2162100000	1659100000	1528100000	1212600000	689840000
293	8048800	23036000	29081000	36495000	39786000	41625000	80791000	141250000	207870000	262430000	332480000	470140000	654770000	722150000	726360000	1645300000	2378000000	2169400000	599110000	938170000	1041500000	804490000	1050200000	1026600000	1356700000	3413300000	3430400000	269300000	223540000	196490000	215550000	150650000	167650000	206630000	99598000	231870000	259210000	250230000	189890000	270220000	237440000	380660000	469130000	759520000	823000000	746020000	1015100000	1383600000	816660000
294	809220	0	3279000	6845300	7047100	4492000	9688600	27852000	44585000	29904000	73861000	106410000	81943000	176970000	108800000	440510000	376640000	639500000	181330000	298140000	399640000	363980000	395220000	317900000	413480000	1200500000	1004300000	24793000	14668000	29759000	70253000	44621000	52430000	44246000	25964000	42480000	54681000	33231000	14532000	15692000	15170000	12682000	20045000	19835000	37372000	73621000	118820000	195440000	174760000
295	1162600	2766000	3330300	5760100	4855200	7150900	6981700	31293000	41105000	55102000	72385000	108330000	136260000	171150000	171550000	396650000	600190000	628200000	224120000	331230000	352720000	257630000	324410000	234760000	321830000	902100000	772680000	50972000	41354000	25078000	39861000	18739000	28022000	14462000	17620000	42930000	48058000	29724000	21682000	26212000	18529000	16605000	8974300	19127000	26826000	32764000	49024000	137190000	110150000
296	1280800	1364200	4296100	4558100	5567200	8080300	12211000	20936000	31506000	39325000	49618000	72379000	95103000	110620000	100520000	229390000	364560000	394530000	124790000	207930000	202900000	155140000	170730000	198360000	211500000	637860000	409960000	27075000	16704000	14010000	11393000	24800000	9769000	1307200	0	1326400	14316000	10103000	17724000	5672400	4560900	3262300	912410	6389300	6879400	8161800	43618000	68809000	48401000
297	0	1715900	2254400	2063100	2622800	2639400	6788700	11469000	13692000	23161000	34561000	52343000	54968000	27430000	30056000	253310000	95445000	333280000	100780000	227020000	246150000	258630000	392150000	391550000	262510000	368600000	130850000	136160000	36366000	0	9373100	0	0	0	0	1553000	0	0	0	0	0	0	0	0	0	0	0	0	3310400
298	0	0	0	0	0	0	944730	1848400	1628900	2283100	3603600	4613800	4990100	5173900	5548700	33809000	47487000	76547000	24082000	44573000	40536000	53891000	113790000	104360000	108450000	133610000	53193000	44116000	6080400	2330400	1852200	0	0	0	0	0	0	0	0	0	0	0	0	0	0	0	0	0	0
299	2085600	6363900	8035500	11978000	11539000	13748000	9342800	16439000	37198000	51485000	66919000	89965000	197240000	213520000	149340000	451380000	564840000	754940000	313210000	534910000	540340000	518580000	849880000	930130000	993990000	910510000	574100000	445540000	162060000	53586000	36793000	12333000	6740700	7953800	1552800	2901100	4076800	0	3765100	3824200	0	0	3484500	4728200	5061700	3104800	1561700	5495000	6877900
300	1214000	4203800	5548000	5823400	6025700	8896900	11212000	22844000	36026000	45688000	66104000	88485000	114690000	127830000	145910000	276020000	425890000	399800000	130650000	271880000	327900000	403730000	403860000	632170000	580750000	825140000	350250000	220180000	58414000	20551000	10104000	5349200	1750500	0	0	1203300	0	0	0	0	0	0	0	0	0	0	0	0	0
301	730420	3930200	6068900	6951100	6998300	5929500	5197200	7014500	10400000	11449000	15989000	20740000	27991000	30440000	35574000	71006000	107390000	97565000	36244000	78245000	70740000	96041000	124640000	128940000	162570000	105400000	63806000	41025000	17866000	7093500	3886000	1848500	2642000	2634800	759360	2811700	3552600	3968200	3100700	2141900	2636000	5155500	6310800	7402200	9805600	8432600	8004000	14460000	32956000
302	602640	1544500	2095700	3857700	3236600	3546800	5034600	8238900	11281000	10495000	11887000	7295100	10946000	10848000	9408300	21180000	3216800	32708000	7964800	52623000	2130800	9885300	10252000	54016000	108900000	149120000	4267100	6369600	5302100	13096000	8636400	10493000	16105000	27735000	7510000	11084000	18491000	14884000	17170000	2916400	1808800	1534600	412240	0	0	0	0	0	0
303	2117000	6263200	7259400	7518300	7984600	10650000	16018000	23789000	34099000	33123000	48650000	56629000	67715000	62542000	69936000	205220000	404660000	393990000	420240000	766060000	877530000	1271300000	933970000	856120000	1853100000	3460700000	177620000	237520000	200460000	162790000	260360000	266330000	270270000	197140000	122340000	231690000	201540000	251980000	364900000	852280000	1070900000	1517000000	1541100000	1583400000	663200000	69452000	14514000	4824300	2544800
304	5551400	14228000	19511000	22966000	25646000	21904000	50110000	82389000	98568000	100180000	131360000	168230000	187240000	235000000	249520000	715470000	1447400000	1213400000	1220400000	1919700000	2169400000	3131700000	1913100000	2118300000	3758300000	6354100000	300720000	409950000	333340000	290510000	464150000	535810000	463130000	398410000	262300000	418520000	370600000	418700000	556910000	1474500000	1895000000	2316700000	2070800000	2496100000	1511800000	495660000	222260000	121950000	26835000
305	577100	0	0	2607800	0	2463200	0	6263200	10071000	10426000	0	0	20531000	19346000	15457000	54475000	116320000	132930000	72179000	152530000	184860000	252560000	266200000	0	331670000	508090000	0	0	0	0	42289000	29735000	0	21233000	0	18977000	22118000	20017000	34287000	51394000	121660000	133870000	128570000	118400000	59391000	14603000	16992000	0	0
306	0	0	0	0	0	0	339980	0	0	0	0	0	0	348720	547450	0	0	2166900	8141800	7147000	15717000	28875000	2958900	0	18178000	22809000	0	1113100	2343500	2448600	0	0	0	0	0	0	0	0	0	4345300	0	2755100	4953200	6440900	2342800	0	0	0	0
307	0	0	0	0	0	0	0	0	0	0	0	0	0	0	0	3731700	0	0	0	3374000	4597200	3461100	0	0	2975100	12947000	0	0	0	0	0	0	0	0	0	0	0	0	0	0	0	0	0	0	0	0	0	0	0
308	0	0	0	0	0	0	0	0	0	0	0	0	0	0	0	0	0	0	1849400	3430800	3046900	2531700	2840300	0	0	8065400	0	0	0	0	0	0	0	0	0	0	0	0	0	0	0	0	1633100	0	0	0	0	0	0
309	2087400	7169200	8763800	8357000	8092400	12569000	14415000	20125000	20607000	16252000	26958000	30729000	25949000	26539000	11060000	17088000	28739000	41072000	37047000	45964000	30580000	61429000	86106000	61141000	91811000	1174700000	483860000	66884000	45381000	38688000	69321000	76739000	354770000	395800000	119660000	233170000	110790000	137220000	151630000	155970000	74338000	99988000	59148000	59901000	36881000	18306000	11930000	17080000	37103000
310	4581400	15603000	20415000	24621000	21782000	24938000	32076000	48859000	54320000	47575000	49593000	63999000	57544000	62055000	36445000	45494000	45728000	87488000	75827000	86387000	112440000	84232000	157190000	111420000	101090000	1520200000	858610000	169910000	68634000	73593000	93775000	81543000	204120000	486610000	373470000	194890000	186930000	194350000	310400000	242880000	81389000	88331000	64669000	58995000	30423000	9071300	7555800	14611000	31659000
311	6207000	17919000	24632000	36864000	48722000	47863000	52297000	95380000	107600000	102330000	123220000	138960000	153910000	155150000	117020000	176980000	118570000	197180000	141170000	124740000	168580000	260660000	308730000	235450000	288300000	3394700000	1278400000	350730000	169970000	140070000	253870000	248240000	515360000	1176800000	743820000	690760000	931810000	316410000	307480000	199590000	84657000	84188000	56264000	56076000	32836000	19227000	36182000	67933000	131430000
312	3688700	13410000	15643000	18765000	19842000	21061000	31387000	37072000	39276000	43866000	51613000	55303000	60075000	64268000	54326000	67529000	55983000	82730000	71999000	75560000	107800000	120890000	130760000	91791000	122290000	1736500000	588420000	109950000	58881000	57963000	68339000	104740000	368010000	817140000	548160000	273450000	104240000	46684000	38154000	37759000	17908000	17228000	14176000	12106000	8343400	4463500	3489400	10016000	25906000
313	158940	521010	739950	886390	1091500	756850	912840	1757900	1815000	1396200	1993000	2049500	1964900	2351200	2108100	0	1758400	3090200	2367400	3685100	0	5200600	6630500	3750300	5957100	40829000	31291000	6456400	3666900	0	4927200	3659500	10187000	20998000	16061000	8572500	2013300	0	0	0	0	0	0	0	0	0	0	3153500	3692700
314	361200	1196300	1426800	1932200	1596900	1573300	2198000	3536300	2693700	1717100	2589800	425320	2105000	847370	1147600	1577900	4002000	1748500	4608500	3639000	5120800	9184700	23561000	13556000	10045000	210310000	153570000	14010000	5960300	5356800	7478000	5468500	32636000	61656000	36423000	14889000	1521400	1375000	955130	2665300	634950	2066300	1287600	1405800	1524100	546300	2059300	3136700	10353000
315	0	0	3218100	5221800	5025600	5390800	6538000	8261300	4555900	8658900	10758000	4195700	10323000	8231800	1911600	12308000	0	13524000	56677000	6261000	0	0	0	8034900	3094700	26109000	33999000	4435600	0	6166300	0	0	0	0	0	0	0	0	0	0	0	0	0	0	0	0	0	0	0
316	8683700	33547000	33335000	54911000	37210000	34369000	43194000	53170000	46385000	51295000	55066000	54090000	57041000	28067000	26432000	36384000	11257000	28536000	154160000	69664000	116980000	3852100	11735000	22457000	47740000	106580000	197920000	4479200	7254700	10104000	0	0	0	0	0	1191200	0	464210	0	1315000	1558700	2792800	3520800	3288300	1098400	0	0	0	0
317	16266000	62142000	66624000	77875000	72064000	71836000	73963000	76079000	53548000	60887000	68140000	59446000	77212000	26183000	39019000	79022000	5533400	92729000	147180000	80520000	98448000	0	8860200	34167000	39404000	171530000	203160000	0	14290000	20497000	0	0	1727900	0	0	0	0	0	0	0	0	0	0	0	0	0	0	0	0
318	3526300	8436000	11398000	9541800	11843000	11014000	13534000	17108000	13973000	12910000	12605000	17959000	9369400	8347200	5100000	10850000	4591700	20059000	28271000	24952000	23120000	1948000	2152000	3951400	19372000	43392000	54032000	1606000	0	0	0	0	0	0	0	0	0	0	709930	854960	1285800	2204400	2169100	2408900	669140	0	0	0	0
319	10156000	30589000	33224000	48249000	42717000	34815000	40470000	46674000	35063000	41537000	50014000	56959000	52361000	45117000	34097000	58184000	18812000	66356000	111820000	61717000	98190000	3732300	10969000	17161000	50620000	178130000	212020000	5135400	13573000	21215000	698410	0	0	0	0	0	0	0	1288400	0	568740	0	0	0	0	0	0	0	0
320	13360000	40985000	37649000	54221000	45883000	43937000	46805000	35049000	52342000	22043000	71213000	45978000	72332000	65180000	43518000	88583000	16441000	53527000	102080000	75173000	126300000	16393000	12951000	24654000	91596000	157130000	208640000	5155600	18186000	27414000	1263300	0	0	0	0	0	0	0	0	0	0	0	0	0	0	0	0	0	0
321	0	5528100	2302400	3095300	3129600	2292300	4168700	3499300	4026800	2158200	6109000	5340300	5528700	9775200	5394400	7030800	9207100	6197100	9311400	28368000	10666000	12202000	7867800	10133000	12938000	27840000	32472000	20321000	7242400	2762800	2222200	0	0	0	0	0	0	0	0	0	0	0	0	0	0	0	0	0	0
322	1831800	5960700	7420400	7980900	10445000	11513000	14332000	15885000	25178000	21393000	16875000	12160000	17218000	10165000	10578000	23448000	18056000	30548000	17442000	26690000	13285000	10014000	20485000	15655000	25407000	100420000	197970000	172020000	56288000	2260400	859580	0	0	0	0	0	0	0	0	0	0	0	0	0	0	0	0	0	0
323	1162000	2478800	7893100	3298700	10986000	5143000	6427800	23676000	28182000	13419000	29149000	19203000	0	20204000	0	17213000	0	4999200	4003500	22078000	0	12284000	18673000	14768000	20813000	63909000	101440000	73502000	7036200	0	0	0	0	0	0	0	0	0	0	0	0	0	0	0	0	0	0	0	0
324	4013900	10852000	14805000	20283000	17969000	21842000	36235000	50669000	68682000	68150000	84815000	70095000	14663000	81968000	42050000	74216000	56207000	154280000	136070000	110130000	60114000	88981000	90671000	69037000	128040000	409900000	527670000	439810000	156350000	28891000	12956000	3046900	2211500	0	0	0	0	0	0	0	0	0	0	0	0	0	0	0	0
325	5806200	19199000	25084000	27758000	34976000	38135000	43133000	59544000	84290000	76765000	80528000	65693000	82634000	54543000	46055000	62743000	58523000	98049000	114120000	96229000	42353000	55220000	75745000	75526000	106140000	317060000	359580000	313810000	74566000	19547000	9782300	0	0	0	0	0	0	0	0	0	0	0	0	0	0	0	0	0	0
326	2587500	11581000	16229000	20027000	20561000	12256000	25341000	14647000	34695000	31659000	36323000	32620000	32472000	22684000	19144000	34011000	26755000	38967000	38542000	38628000	20192000	29013000	48887000	46662000	68396000	169550000	177450000	112160000	7816100	629860	260540	0	0	0	0	0	0	0	0	0	0	0	0	0	0	0	0	0	0
327	6326200	20670000	27122000	34652000	35704000	37033000	8561700	51353000	75640000	63165000	17853000	38437000	43305000	27195000	8983700	27605000	10339000	44265000	44528000	33191000	5918600	6243300	38848000	38810000	28772000	175110000	184370000	164110000	15966000	0	3649300	0	0	0	0	0	0	0	0	0	0	0	0	0	0	0	0	0	0
328	450410	2073400	1838300	2468200	2585100	1480400	4234600	3130400	11538000	7766200	7511100	5949900	6271800	9504200	5248100	7238800	3300200	10481000	4944200	7289000	10089000	2609100	49072000	7514500	60433000	14601000	80632000	56766000	8049500	3751900	0	0	0	0	0	0	0	0	0	0	0	0	0	0	0	0	0	0	0
329	0	0	0	0	0	0	0	0	0	0	0	0	0	0	0	0	0	0	0	0	0	0	0	0	0	0	234500	201940	147550	0	0	0	0	0	0	0	0	0	0	0	0	0	0	0	0	0	0	0	0
330	0	0	142870	0	0	0	0	0	255820	0	0	0	651610	0	0	0	0	0	0	0	0	0	0	0	0	0	845360	462150	0	0	0	0	0	0	0	0	0	0	0	0	0	887640	0	0	0	0	0	0	0
331	0	0	0	0	0	0	0	0	0	0	0	0	0	0	0	0	0	0	0	0	0	639060	0	0	0	0	0	2136100	0	0	710300	450640	988310	0	0	0	0	0	0	0	923520	478560	1247400	0	0	0	0	0	0
332	0	0	0	0	0	0	0	0	0	0	0	0	0	0	0	0	0	145460	0	162630	0	477390	767380	1667200	2072500	429620	981760	115080000	2957200	0	1659600	3790700	28101000	0	0	0	0	0	0	0	0	0	0	0	0	0	0	0	443770
333	0	0	0	0	0	0	0	0	0	0	0	0	0	0	0	0	0	0	0	0	0	0	0	0	0	0	0	2345200	0	0	0	0	0	0	0	0	0	0	0	0	0	0	0	0	0	0	0	0	0
334	0	0	0	0	40292	0	0	0	0	0	0	0	0	0	0	0	0	0	0	0	0	0	0	0	0	0	0	459750	0	0	0	0	0	0	0	0	0	0	0	0	0	0	0	0	0	0	0	0	0
335	0	0	0	0	0	0	0	0	0	0	0	0	0	0	0	0	0	0	0	0	0	0	0	0	0	0	2920700	112940000	24573000	0	0	0	0	0	0	0	0	0	0	0	0	0	0	0	0	0	0	0	0
336	0	390700	460050	531380	350010	363130	612130	518390	444280	0	0	0	0	0	0	743230	0	0	0	1322200	978480	978080	1290700	2394200	4531600	6942500	9653100	389770000	151080000	0	0	0	1304600	0	0	1522100	0	2230500	0	0	0	0	0	0	0	0	0	0	0
337	0	0	266500	287100	0	0	0	0	0	0	0	0	0	0	0	0	0	0	0	0	0	0	0	794960	1035500	1869800	2742500	207990000	103260000	1427400	0	0	0	0	0	1335000	0	716100	0	0	0	0	0	0	0	0	0	0	0
338	0	0	0	87128	0	0	0	358280	0	0	0	0	0	0	0	246300	0	0	0	0	0	0	0	0	0	0	4170000	175640000	83514000	0	0	0	0	0	0	0	0	0	0	0	0	0	0	0	0	0	0	0	0
339	0	0	0	0	0	0	0	0	0	0	0	0	0	0	0	0	0	0	0	0	0	0	0	0	0	0	3286200	50525000	26106000	0	0	0	0	0	0	0	0	0	0	0	0	0	0	0	0	0	0	0	0
340	0	0	0	0	0	0	0	0	0	0	0	0	0	0	0	598600	0	2225200	1794100	2338500	1227200	1640700	1343200	1228600	1569500	4502000	10484000	44712000	26723000	1578300	603220	0	0	0	0	0	0	0	0	0	0	302890	652000	1626100	1338400	1195700	515670	325890	0
341	0	0	0	0	0	0	0	0	0	0	0	0	0	0	0	0	0	0	0	0	0	0	0	0	0	521450	1113200	6952500	4400900	6001500	2936800	0	0	0	0	0	0	0	0	0	0	0	0	0	0	0	0	0	0
342	0	0	0	0	0	0	0	0	0	0	0	0	0	0	0	0	0	0	0	0	0	0	251060	417040	660560	1132900	3246300	4736000	3284300	5745800	103470	0	0	0	0	0	0	0	0	0	0	0	0	0	0	0	0	0	0
343	0	0	0	0	21910	0	0	0	0	0	0	0	0	0	0	0	0	330600	0	0	0	0	0	0	0	375060	0	467420	0	277050	0	0	0	0	0	0	0	0	0	0	164380	0	0	0	0	0	0	0	0
344	58358	124530	489180	454380	494860	188020	460240	678260	620960	1112300	1139000	1417500	963090	326480	858230	1427300	1284200	1874800	1592200	1799500	672770	1226400	1594900	758710	925890	1502200	1254500	2395400	1527300	1034500	1526200	1005900	720230	746070	0	0	0	368110	363660	662950	511240	811200	816250	1041400	496950	182960	0	0	0
345	0	68791	195150	302470	107470	168110	0	133010	152720	377190	160430	142620	465960	416720	0	483200	190290	773020	269610	1015200	250040	1475500	2169800	955000	535160	1449800	778560	3140100	1916700	755800	1620600	509990	0	0	0	0	0	0	0	0	0	0	0	0	0	0	0	0	0
346	0	0	0	0	0	0	0	0	0	0	0	0	0	0	0	0	0	0	0	1830400	0	0	1584300	0	1876300	0	0	2609000	1214500	0	1434400	0	0	0	0	0	0	0	0	0	0	0	0	0	0	0	0	0	0
347	0	0	0	0	0	0	0	0	0	0	0	0	0	0	0	554630	0	682470	349460	1006000	0	349490	542570	469270	800380	1099100	218340	1228800	475700	232740	1548400	564550	761420	0	0	0	0	0	247020	1330900	515450	0	0	0	0	0	0	0	0
348	0	0	0	0	0	0	0	0	0	0	0	0	0	0	0	0	0	0	0	0	0	0	0	0	0	0	0	357760	565740	0	177480	0	0	0	0	0	0	0	0	122810	0	0	0	0	0	0	0	0	0
349	0	0	0	0	0	0	0	0	0	0	0	0	0	0	0	0	0	0	0	0	0	0	0	0	0	0	0	0	2147000	839620	0	0	0	0	0	0	0	0	0	0	0	0	0	0	0	0	0	0	0
350	0	0	0	0	0	0	0	0	0	0	0	0	0	0	0	0	0	0	0	0	0	0	0	0	0	0	0	0	1677700	1052700	0	0	0	0	0	0	0	0	0	0	0	0	0	0	0	0	0	0	0
351	0	0	0	0	0	0	0	0	0	0	0	0	0	0	0	0	0	0	0	0	0	888790	833000	1884400	2004800	3981800	9494000	49611000	225070000	156570000	570160	0	674000	2322700	317310	2786300	18212000	0	0	0	0	0	0	0	0	0	0	0	0
352	0	0	0	0	0	0	0	0	0	0	0	0	0	0	0	0	0	0	0	0	0	0	0	0	0	0	0	149670	346480	175850	0	0	0	0	0	0	0	0	0	0	0	0	0	0	0	0	0	0	0
353	0	0	0	0	0	0	0	0	0	0	0	0	0	0	0	0	0	0	0	0	0	0	0	0	0	0	0	314920	484800	196710	130170	0	0	0	0	0	0	0	0	0	0	0	0	0	0	0	0	0	0
354	220360	1226800	1020500	553590	1039500	1416000	1079800	3216900	4987200	6027800	6339200	6940600	8474100	6334500	4481000	12870000	6671700	24606000	18832000	34840000	21932000	52744000	38825000	19435000	22575000	57978000	70236000	176630000	243770000	3446300	2623100	4228900	12509000	237640	0	0	2406900	1109000	366010	1817500	3016100	8286600	8820600	3739800	3184400	3831900	8267500	14533000	9357600
355	1708500	2700100	6840300	3906600	2582000	2679700	3990400	3821700	4868200	3629500	4332600	3812400	3967800	2867200	2047600	4024900	979230	0	1728300	4881900	3065700	0	0	2561200	0	0	0	7030600	58848000	0	0	0	0	0	1404700	0	0	0	0	0	0	0	0	0	0	0	0	0	0
356	2517400	6758600	7887800	9355500	11403000	7291200	9410600	3119500	3423700	12736000	13655000	13850000	11712000	10892000	0	15154000	0	7914800	6022500	17479000	11989000	4300800	0	7979500	5061500	0	5003500	36401000	67032000	0	0	0	0	0	0	0	0	0	0	0	0	0	0	0	0	0	0	0	0
357	8910100	29700000	29489000	28383000	28328000	30191000	32019000	41834000	44062000	37062000	41245000	32852000	41979000	22121000	17836000	35526000	10652000	22815000	20145000	51266000	30195000	10682000	6894000	20692000	16605000	7844000	15634000	86418000	160320000	2019800	0	0	0	0	0	0	11726000	12231000	915130	0	0	1049500	976350	1885900	1772800	8505000	14183000	11407000	0
358	11463000	37705000	42496000	57142000	43458000	49901000	57204000	61959000	59265000	62693000	37340000	65690000	40188000	47938000	30076000	56372000	15202000	40878000	21179000	72348000	30903000	16560000	15537000	43211000	35955000	14138000	19044000	97807000	237120000	3865400	823660	0	0	0	0	2339400	8507200	11390000	670170	872880	2596200	4147700	9268400	20448000	26985000	23393000	32312000	11898000	0
359	80442	207870	639690	818960	770430	1306100	2258700	3057400	5103500	4111200	2564300	2251500	1459900	1523400	656660	1806100	355120	432880	287780	282190	81898	288090	0	223220	0	0	0	0	6164200	0	0	3062700	0	0	0	0	0	0	0	244480	0	457450	1702500	440170	0	0	0	0	0
360	0	0	0	0	0	0	0	102440	90357	67506	0	0	0	0	0	0	0	0	84584	0	0	0	0	0	0	0	0	0	144290	0	0	0	0	0	0	0	0	0	0	0	0	0	0	0	0	0	0	0	0
361	0	0	0	0	0	76640	0	544140	159340	579130	186110	266220	322250	0	249000	467950	246890	431380	322920	419680	434710	428980	430760	255910	0	0	346270	1106200	1157800	0	0	658050	0	0	0	0	0	0	0	0	0	0	0	0	696920	0	658990	0	0
362	0	0	0	0	0	130320	72029	0	135340	170360	297850	269670	339670	0	0	256020	0	401730	0	258130	0	1021100	379810	0	0	0	0	622860	714010	0	0	0	0	0	0	0	189770	0	0	0	0	0	0	0	0	0	607540	505850	0
363	0	116530	142440	252450	132080	188440	300310	414280	344580	723700	556610	0	716210	811840	366580	0	832880	1194900	930880	1163500	1377500	1301500	1201200	1087200	1319200	0	1238700	1673200	1245900	1179700	1776800	0	1231400	1378200	1202500	555750	0	0	0	0	0	0	0	0	0	0	0	967280	1918000
364	0	0	0	0	0	0	0	0	0	0	0	0	0	0	0	0	0	0	194320	0	0	325700	303230	0	0	0	0	0	279090	0	881980	65252	0	0	0	0	0	0	0	0	0	0	0	0	0	0	0	0	0
365	0	0	0	0	0	0	0	0	0	0	0	0	0	0	0	0	0	0	0	0	0	0	0	0	0	0	0	0	0	0	6511700	0	0	0	0	0	0	0	0	0	0	0	0	0	0	0	0	0	0
366	0	0	0	0	0	0	0	0	0	0	0	0	0	0	0	0	0	0	0	0	0	0	0	0	0	0	0	0	0	0	99894	0	0	0	0	0	0	0	0	0	0	0	0	0	0	0	0	0	0
367	0	0	0	0	0	0	0	0	0	0	0	0	0	0	0	0	0	0	0	0	0	0	0	0	0	0	0	0	0	0	359560	0	0	0	0	0	0	0	0	0	0	0	0	0	0	0	0	0	0
368	0	0	0	0	0	0	0	0	0	0	0	0	0	0	0	0	0	0	0	0	0	0	0	0	0	0	0	382940	1093300	1434800	14059000	6046500	0	0	0	0	0	0	0	0	0	0	0	0	0	0	0	0	0
369	0	542330	264190	957740	756460	724110	2221200	2851500	3326200	1410900	2886700	0	2140000	0	0	0	0	1082800	0	0	0	0	0	0	0	1571300	1542800	6104500	3279800	2603900	10819000	4279700	2043100	1967200	0	1237600	0	0	0	0	0	0	0	0	0	0	0	0	0
370	0	0	0	78634	107360	259550	1906600	11257000	23507000	11227000	12599000	11059000	12376000	12853000	4786200	10239000	1974100	8302600	6542200	9033400	3401900	5235500	4275100	4443400	7270700	4194000	11852000	34852000	49023000	44320000	46747000	12109000	252760	273550	0	0	0	0	0	0	0	0	0	0	492450	418580	1294100	933280	0
371	0	0	0	0	0	0	0	0	0	0	0	0	0	0	0	0	0	0	0	0	0	0	0	0	0	0	0	1722300	25008000	45235000	27612000	18048000	2166500	1374800	0	0	0	0	0	0	0	0	0	0	0	0	0	0	0
372	0	0	0	0	0	0	0	0	0	0	0	0	0	0	0	0	0	0	0	0	0	0	0	0	0	0	137490	470860	1447300	1231600	1873300	390100	0	0	0	0	0	0	0	0	0	0	0	0	0	0	0	0	0
373	0	0	0	0	0	0	0	0	0	0	0	0	0	0	0	0	0	0	0	0	0	0	0	0	0	0	0	0	1107900	3439900	5657700	0	0	0	0	0	0	0	0	0	0	0	0	0	0	0	0	0	0
374	0	0	0	0	0	0	0	0	0	0	0	0	0	0	0	0	0	0	0	0	0	0	439980	0	0	807440	0	760260	888630	505170	998590	0	0	0	0	0	0	0	0	0	0	0	0	0	0	0	755110	556160	0
375	0	0	0	0	0	0	0	0	0	0	0	0	0	0	0	0	0	0	0	0	0	0	0	0	0	0	0	0	0	97074000	28384000	0	0	0	0	0	0	0	0	0	0	0	0	0	0	0	0	0	0
376	0	0	0	0	0	0	0	0	0	0	0	0	0	0	0	0	0	0	0	0	0	0	0	0	0	0	0	0	0	306410	0	0	0	0	0	0	0	0	0	0	0	0	0	0	0	0	0	0	0
377	0	0	0	23173	0	0	42506	79090	63776	184580	236930	151290	277740	396920	104740	886500	434630	793930	220490	383120	647920	420620	538360	1146900	2224100	2038200	517140	1462000	61596	222130	539110	531340	0	0	853600	2909700	0	0	0	0	0	0	0	0	0	0	0	0	0
378	0	249330	1093600	1211700	826340	1948900	1939900	3885500	4588200	3269400	5466100	5196600	5524900	5733500	1590100	9893300	3462000	13314000	9736300	16670000	14796000	17847000	16189000	13092000	13750000	25565000	15991000	7595000	14050000	8914300	14567000	11922000	11630000	6646300	3690900	58303000	16153000	3535300	903600	2779200	2246600	2523100	2071900	1707300	889270	0	4225300	7116700	3712500
379	0	0	0	0	0	0	0	0	0	0	0	0	0	0	0	0	0	200310	0	0	0	0	0	0	0	0	0	0	0	181230	0	0	0	0	0	438450	0	0	0	0	0	0	0	0	0	0	0	0	0
380	0	0	0	0	0	0	0	0	0	0	0	0	0	0	0	0	0	0	0	0	0	0	0	0	0	0	0	0	0	0	0	0	0	0	0	4139800	0	0	0	236370	0	0	0	0	0	0	0	0	0
381	178540	477500	1117000	1320900	885120	1457500	1885100	1625800	1804100	2415800	3883600	2871400	2778600	2535300	340050	3656400	2190300	3412200	4945100	2167700	4079100	7308700	5929700	2392500	1839200	1526500	1571600	2219900	3084700	1526900	3430800	2899000	4357000	6173700	44994000	1972400000	327280000	6132300	1068300	4061400	4550600	7185600	7764900	16949000	25390000	16804000	24462000	21308000	27892000
382	0	0	0	0	0	0	0	0	0	0	0	0	0	0	0	0	0	0	0	0	0	0	0	0	0	0	0	0	0	0	0	0	0	0	0	7022400	1184100	0	0	0	0	0	0	0	0	0	0	0	0
383	0	0	0	0	0	0	0	0	0	0	0	0	0	0	0	0	0	0	0	0	0	0	0	0	0	0	0	0	0	0	0	0	0	0	753450	3102500	400100	0	0	0	0	0	0	0	0	0	0	0	0
384	0	0	0	0	0	0	0	0	63107	0	0	0	0	0	0	0	0	0	0	0	0	0	137610	0	0	0	79645	65763	68582	0	0	268220	0	146340	0	434530	166510	0	0	0	0	0	0	0	0	0	0	0	0
385	0	0	0	0	0	0	0	0	0	0	0	0	0	0	0	0	0	0	0	0	0	0	0	0	0	0	352760	332070	219870	389070	317970	513610	191070	260150	0	2538400	3025200	386630	235870	0	0	0	0	0	0	0	0	0	0
386	619630	1617100	3668800	2561300	4556000	3044200	7364700	13902000	13606000	13485000	28311000	25702000	26952000	19994000	15812000	25745000	23408000	51860000	30110000	51817000	46012000	53578000	61222000	44122000	51455000	88873000	67172000	105640000	88315000	76338000	158660000	134580000	134110000	159900000	92912000	1249200000	819750000	40869000	4487900	1642900	181230	0	0	0	0	0	0	0	0
387	0	0	0	0	0	0	0	0	0	0	0	0	0	0	0	0	0	0	0	0	0	0	0	0	0	0	0	0	0	0	183450	0	108140	218430	135140	885070	629620	72278	0	0	0	0	0	0	0	0	0	0	0
388	0	0	0	0	0	0	0	0	0	0	0	0	0	0	0	0	0	0	0	0	0	0	0	0	0	0	0	0	0	0	334410	0	329540	527710	0	893460	1086100	0	0	0	0	0	0	0	0	0	0	0	0
389	2302000	7069500	8733300	10894000	9285800	10727000	10847000	13384000	16437000	21555000	33442000	51289000	71042000	57068000	29309000	34484000	30793000	43809000	26702000	26610000	32454000	23197000	15297000	5059200	4926300	7216500	6553800	8770400	6200600	6146000	25496000	20623000	55880000	99900000	71281000	154470000	88702000	39440000	19160000	11660000	11406000	2561900	2631100	3054500	2232700	2824400	5541700	9207000	6658600
390	382940	1223700	1077800	1340900	1420400	1451700	1624200	1957400	2317800	2655600	4624700	7855000	10970000	8289400	4423300	4076900	4118200	6479900	5142900	6778000	5496000	4300400	2730700	1712400	1651200	1749300	1191200	2367200	1634100	2299800	3819000	7036800	12284000	16774000	19167000	24671000	18437000	7114200	0	0	1512900	1479500	1074400	1434900	0	1068300	0	0	2214900
391	0	0	0	0	0	0	0	0	0	0	0	0	0	0	0	0	0	0	0	486780	0	0	0	0	0	0	732620	998500	3494400	1511500	1941800	7422100	10465000	4732000	5744100	10280000	6507500	0	0	0	341220	0	0	0	0	0	0	0	0
392	0	0	117380	0	0	0	75115	122890	0	0	187610	0	0	245200	229600	0	545620	776010	883950	865960	0	359470	2099900	0	631220	1222400	4048800	6933500	7652600	6681600	18987000	43076000	47844000	55757000	36797000	64679000	20978000	5582800	2203500	790520	593310	155420	0	0	0	0	598630	744900	777800
393	0	0	0	0	76924	0	0	0	134810	131130	0	0	0	0	0	0	0	471150	414660	367090	272420	2906600	1826600	3661400	3336700	2420900	3230100	7465800	8140600	8518000	20229000	31757000	60658000	66903000	49070000	70540000	25240000	7747700	1996700	1251400	539750	363000	690420	655420	988400	347950	975630	0	0
394	0	0	0	0	0	0	357920	710440	0	459540	1025700	673580	1318100	0	938880	886840	969820	1180300	2116400	1956800	1802600	2316000	7067200	5445500	3821000	11746000	8739900	12507000	13704000	12831000	39282000	63561000	71312000	115380000	79247000	94758000	40214000	4310800	0	1863300	877510	711980	0	0	0	0	0	1520600	903810
395	0	0	0	0	0	0	0	0	0	0	0	0	0	0	0	0	0	0	0	0	0	0	0	0	0	0	0	0	221770	184520	1171000	3918400	4545500	11973000	6339500	14494000	8171800	0	0	0	0	0	0	0	0	0	0	0	0
396	0	0	0	0	0	0	0	121420	0	152780	0	0	0	0	0	0	0	281740	0	0	0	0	1686700	257900	0	387700	340070	868010	0	1194100	1160200	5800500	668620000	1428700000	771470000	1420500000	1429900000	305870000	11812000	0	0	322530	0	0	220250	0	0	0	442840
397	101340	422500	825160	658720	532860	883670	866560	1343000	1976300	1811700	1234500	670960	1232700	1031400	1193100	1844700	1046900	2771700	1889100	871030	482720	2002100	1776100	1813500	1475300	2424000	2222100	1510900	2344100	1126300	1748500	2345800	2666300	9947900	4983200	12604000	2648100	255620	0	0	0	0	0	0	0	0	0	0	0
398	16070000	50080000	54452000	59761000	64119000	61548000	82687000	120450000	157380000	166970000	234360000	322460000	278310000	290840000	244340000	351320000	358380000	532730000	464580000	669450000	669060000	683870000	738860000	806550000	1030000000	1455700000	855490000	1176500000	1370900000	1543100000	1902900000	1751400000	1607000000	2572800000	6425600000	8061700000	160540000	83120000	61429000	58110000	17212000	8901000	10888000	5669200	2256900	0	1534000	634620	716980
399	121860	608000	731560	752790	730980	514200	697480	520160	731830	907920	1194000	5008200	1101400	1411100	1059900	0	3627200	1485200	4612100	1936900	2349600	3245000	1775400	1999900	0	4295300	5240600	5370800	6074700	4893400	8606100	8348400	13629000	10079000	14689000	10682000	4599600	3204400	5094300	6796900	3299100	4721300	6098700	9956800	8822900	4352500	2370400	4417200	3491600
400	0	0	100290	125500	121360	72281	169150	152830	154310	117780	223160	420910	303180	0	0	3551700	0	360860	2775500	1795700	1976900	8530900	15043000	24399000	15607000	8765200	12972000	30090000	25161000	34163000	55464000	42770000	86759000	167950000	161740000	248300000	150790000	94211000	47888000	102770000	65288000	94540000	131980000	196530000	13023000	0	0	0	0
401	0	0	0	0	0	0	0	0	0	0	0	0	0	0	0	0	0	0	0	0	0	0	0	0	0	0	0	0	0	0	0	0	635680	0	0	1162500	0	0	0	0	0	0	0	0	0	0	0	0	0
402	0	0	1548900	0	0	0	0	0	0	0	0	0	0	0	0	0	0	0	0	0	0	0	0	0	0	0	0	0	0	0	0	0	0	0	0	8150900	1559900	4172300	0	0	0	0	0	0	0	0	0	0	0
403	152370	1028400	3197300	4641300	2401900	2465600	1423600	835750	881580	1373000	1440000	1538200	1648600	5878600	0	0	0	0	0	0	0	0	0	0	0	0	0	0	0	380280	2286500	764690	2902000	1221400	0	18685000	8011000	4979200	3428900	1598300	647960	795060	1173300	1179700	0	1653300	0	0	3237600
404	0	0	0	0	0	0	0	0	0	240840	0	0	590220	0	0	0	0	0	0	0	0	0	0	0	0	0	0	0	0	0	561250	0	0	0	0	1162600	848820	0	0	702840	0	1111700	0	0	0	0	1027700	784150	0
405	519090	2225900	2398000	1667700	2259400	1731100	1210500	1597500	5102200	5553400	2899300	2223600	3439100	1603000	0	0	0	0	0	1401200	0	0	4324200	0	0	1856200	0	0	944840	0	0	1830100	10342000	0	2023800	9201300	3784700	0	0	0	0	0	0	3858000	0	6867400	3347900	0	0
406	0	0	0	0	0	0	0	0	0	0	0	0	0	0	0	0	0	0	0	0	0	0	0	0	0	0	0	0	0	0	0	0	352150	105120	312420	121880	0	0	0	0	0	0	0	0	0	0	0	0	0
407	214730	1511500	1165700	971850	653740	402400	603100	754160	884530	257500	205820	0	0	0	0	0	0	0	0	0	0	0	0	0	0	0	0	0	0	0	0	498010	1445800	10518000	22508000	6828500	0	0	0	0	0	0	0	0	0	0	0	0	1293400
408	0	0	0	0	0	0	0	0	0	0	0	0	0	0	0	0	0	0	0	0	0	0	0	0	0	0	0	0	0	0	0	0	5170200	31149000	163740000	97373000	0	0	0	0	0	0	0	0	0	0	0	0	0
409	0	0	0	0	0	0	0	0	0	0	0	0	0	0	0	0	0	0	0	0	0	0	0	0	0	0	0	0	0	0	0	0	0	0	882170	401850	0	0	0	0	0	0	0	0	0	0	0	0	0
410	0	0	0	0	0	0	0	0	0	1263800	0	8845500	3574400	0	0	0	0	1394300	0	0	0	0	0	0	10215000	0	0	0	1350100	16504000	0	13145000	0	0	69674000	0	0	0	0	0	0	0	0	0	0	0	0	0	0
411	0	7901100	2481900	0	0	9056000	5473700	7191100	588200	14884000	1056900	6813000	988110	445070	0	0	0	5307500	368110	630260	318060	691400	1568200	772090	1092700	951910	2036800	3381100	5540700	7341700	12756000	24647000	2379600	0	0	0	0	0	0	0	0	0	0	0	0	1719300	0	4980000	2091600
412	334150	838460	2048600	2557400	1929100	2612000	3918700	8941500	15825000	15655000	10062000	3165200	2298600	5451100	2265300	14438000	17031000	20233000	3590400	3270700	788130	825890	1148300	2531800	1125400	2541600	0	2387000	1505800	1192000	19689000	34905000	22012000	14303000	1887700	12608000	9700400	3313800	971810	1029900	630000	0	0	968620	1647600	1570100	1074400	3047900	4651600
413	0	0	0	0	0	0	0	0	0	0	0	0	0	0	0	0	0	0	0	0	0	0	0	0	0	0	0	0	0	0	8518800	11382000	11062000	0	0	0	13616000	0	0	0	0	0	0	0	0	0	0	0	0
414	0	0	0	0	0	45310	108590	464480	202340	188390	115640	0	313950	0	0	299290	0	163300	0	209560	0	0	847820	997770	0	198010	1689000	2818500	2764100	485080	6528700	12625000	13234000	4430400	2337600	3342400	4150600	5393200	3977800	615070	340900	247040	1302200	347340	869400	0	0	0	0
415	0	0	0	0	0	0	0	0	0	0	49270	0	0	0	0	0	0	0	0	0	0	0	83755	0	0	0	92491	188830	68117	89805	1133900	1738700	1923700	817600	658890	360480	0	0	0	0	0	0	0	0	0	0	0	0	0
416	39644	95177	145190	116730	217390	144680	138760	252900	229590	259920	288770	248930	154560	278460	0	0	118520	588380	760380	466160	307120	334520	857140	263410	365400	355980	342310	1036500	2822000	3086200	6982900	8867800	6643900	4408300	519700	308120	0	0	0	0	0	0	0	0	0	0	0	0	0
417	223280	1437600	1606700	1686000	1552400	558170	687000	1403900	770210	1851000	2077800	9670500	3409000	2903200	0	0	0	0	1093600	1319200	0	0	1425400	0	0	0	1094400	5166000	5198500	7138000	48353000	69278000	45942000	7206000	1214100	1723000	1961100	6919900	1988700	2626900	2119100	0	2564900	2686000	1648600	0	1397400	2202200	2915300
418	0	0	0	0	0	0	0	0	0	0	0	0	0	0	0	0	0	0	0	0	0	0	0	0	0	0	0	0	506640	8546300	49197000	51371000	46029000	14047000	0	0	0	0	0	0	0	0	0	0	0	0	0	0	0
419	1425900	3166000	3695400	4422500	4104000	3867400	7718100	7966200	10777000	11480000	12104000	17089000	17637000	19755000	13558000	20543000	21483000	27973000	25294000	42621000	45733000	50647000	57644000	54411000	74717000	83098000	79732000	121410000	105450000	241580000	782520000	870900000	889590000	296110000	43752000	88971000	48558000	54263000	72175000	153840000	186640000	237630000	244170000	68467000	45843000	45564000	68272000	118130000	122590000
420	0	0	0	0	0	0	160060	0	0	0	0	0	0	0	0	0	0	0	0	0	0	0	0	0	0	0	0	0	1028800	950820	8333000	11417000	5628500	0	0	0	0	0	0	0	0	0	0	0	0	0	875240	1305800	0
421	0	0	0	0	0	0	0	0	0	0	0	0	0	0	0	0	0	0	0	0	0	0	0	0	0	0	280160	431890	502630	454520	1569800	6097800	3016000	0	0	0	0	0	0	0	0	0	0	0	0	0	0	0	0
422	0	0	0	0	0	0	0	0	0	0	0	0	0	0	164570	0	0	0	318920	1648700	5851700	270460	322250	0	0	416840	273620	6960700	9488400	10290000	35412000	29260000	22110000	0	0	0	0	0	0	0	0	0	0	0	0	0	0	0	0
423	12263000	21581000	17042000	16014000	14463000	14118000	17970000	30529000	33543000	34577000	37246000	23181000	43057000	36236000	25938000	44419000	41688000	57566000	49807000	82847000	90743000	103510000	110780000	109880000	95213000	120060000	116700000	254230000	337570000	519200000	1343600000	1187400000	649070000	93752000	328650	437550	1185400	499800	904680	305870	394930	0	0	0	0	0	0	0	0
424	3324500	9631300	13920000	14998000	16062000	14466000	18974000	26889000	36962000	37383000	48889000	46680000	50715000	34618000	40005000	65842000	66225000	106250000	89325000	140750000	123090000	175770000	191200000	231270000	228320000	164890000	219400000	418290000	561860000	803370000	1445100000	1342600000	264460000	1186400	585600	1166200	4585500	2862200	3078100	3964600	2098900	1581100	1672900	0	108550	2003400	3971300	11059000	4866200
425	0	0	0	0	0	0	0	0	0	0	0	0	0	0	0	0	0	0	0	0	0	0	64998	0	0	0	0	0	0	91416	87846	285660	0	185910	0	0	0	0	0	0	0	0	0	0	0	0	0	0	0
426	0	0	0	0	0	0	0	0	0	0	0	0	0	0	0	0	0	0	0	0	0	0	0	0	0	611070	0	389440	429930	379680	2539100	6938400	213440	0	0	0	0	0	0	0	0	0	0	0	0	0	0	0	0
427	2159200	4231300	4227700	3620600	5702500	9364200	40989000	143820000	27272000	27642000	15889000	7568300	8578000	13743000	7401900	7612200	2639700	11756000	7270100	8099800	7892000	12597000	14389000	10152000	14751000	4359300	5454200	22834000	15083000	4614100	53664000	2099300000	4396800	468770	0	0	715440	0	0	0	0	0	307470	243790	0	0	402560	470610	513460
428	0	0	0	0	0	0	0	0	0	0	0	0	0	0	0	0	0	0	0	0	0	0	0	0	0	0	0	0	0	0	1418300	15582000	1488700	1609200	203650	0	321180	242660	467950	2200900	1408900	0	0	0	0	0	0	0	0
429	0	0	0	0	0	0	0	0	527280	0	0	0	0	0	0	0	0	0	0	0	0	876530	0	0	0	0	0	0	0	0	691350	3451300	383380	0	0	0	0	0	0	626140	0	0	0	0	0	0	1337900	0	0
430	0	0	0	0	0	0	0	375900	0	0	672080	0	0	0	0	0	0	0	1889100	2066900	0	5088600	1682400	0	3146600	0	0	0	0	0	0	10915000	4879700	0	0	0	0	0	0	0	0	0	0	0	0	0	0	0	0
431	0	0	0	0	0	0	0	0	0	0	588820	0	0	0	0	0	0	0	0	0	0	0	0	0	0	0	0	0	2913500	0	0	0	2006900	0	0	0	0	0	0	0	0	0	0	0	0	0	0	0	0
432	0	0	0	0	0	238460	221850	417780	0	333310	361070	0	0	0	0	0	0	0	0	0	0	0	0	0	0	0	0	0	834890	0	0	1045900	975530	0	0	0	0	0	0	0	0	0	0	0	0	0	0	0	0
433	0	0	0	0	0	0	0	0	0	0	0	0	0	0	0	0	0	0	0	0	0	0	0	0	0	0	0	0	0	0	159010	139550	736800	207670	0	0	0	0	0	0	0	0	0	0	0	0	0	0	0
434	0	0	0	0	0	0	0	0	0	0	0	0	0	0	0	0	0	0	0	0	0	0	0	0	0	0	0	0	0	0	0	0	2584300	789290	0	0	0	0	0	0	0	0	0	0	0	0	0	0	0
435	0	0	0	0	0	0	0	0	0	0	0	0	0	0	0	0	0	0	0	0	0	0	0	0	0	0	0	0	0	0	0	0	24408000	1132500	0	0	0	0	0	0	0	0	0	0	0	0	0	0	0
436	0	0	0	0	0	0	0	0	330050	0	0	0	0	0	0	0	0	0	0	0	0	0	0	0	0	0	0	0	0	0	0	2809300	80546000	5620700	929170	0	0	0	0	0	0	0	0	0	0	0	0	0	0
437	0	0	0	0	0	0	0	0	0	0	0	0	0	0	0	0	0	0	0	0	0	0	0	0	0	0	0	0	0	0	190480	2625300	11587000	418100	0	0	0	0	0	0	0	0	0	0	0	0	0	0	0
438	0	48890	0	0	0	0	0	0	0	0	0	0	0	0	0	0	0	0	0	0	0	0	0	0	349920	301330	879450	874260	598150	3440800	15828000	144170000	303590000	27123000	0	0	0	0	0	0	0	0	0	0	0	0	0	0	0
439	379230	1167500	1782200	1948200	1793500	1647400	2415900	4787300	8898300	8394800	8994900	13953000	10652000	7259600	2516400	6262600	3712900	24404000	19355000	30851000	20811000	40366000	38540000	43104000	48507000	37518000	47148000	122720000	103940000	128800000	321440000	599200000	1198000000	455030000	8489100	10910000	5924700	5296100	2371400	4890000	4545500	6554700	4141600	3233900	9734000	16427000	52296000	53450000	13359000
440	233670	1039000	2221600	2103600	1969700	2692700	986780	1071400	2155900	2296500	922870	3874700	6482400	6237700	4284600	9056000	6091700	5471300	4977500	6232300	7099200	8860400	13407000	9650500	12634000	5636700	9927000	20279000	19209000	12038000	23676000	34688000	56885000	15137000	3416900	12856000	6322100	8719000	13527000	16442000	22006000	23895000	19467000	13074000	4049200	2920600	10118000	7494300	7240200
441	0	0	0	0	0	247600	248710	459220	362340	417280	0	0	0	791310	0	835900	0	665340	1082500	1072300	0	579590	658190	819370	0	1276000	852970	932610	681530	1088000	3758100	1581600	6242200	1342500	0	467370	0	1424800	1035500	1698200	1886700	3477900	1374300	2019200	0	845550	0	0	1096700
442	0	0	0	0	0	0	0	0	0	0	0	0	0	0	0	1067100	0	0	0	0	0	0	0	0	0	0	0	0	0	0	0	0	1798300	774440	0	0	0	0	0	0	0	1900400	0	0	0	0	0	0	0
443	0	0	0	0	0	0	0	0	0	0	0	0	0	0	0	0	2564500	0	927700	0	0	0	0	0	0	0	0	0	0	0	0	0	4529100	7778700	0	0	0	2382000	2211100	0	627520	0	0	0	2727700	0	2948900	0	0
444	655160	1663300	2100700	2336800	1431100	1843800	2948800	4362500	5644200	5669200	7655600	8090600	7738400	9676400	6767900	6311900	5213000	12965000	13777000	22336000	11990000	21441000	24539000	26696000	39588000	53888000	35066000	77414000	62988000	80673000	173740000	295160000	662180000	3003500000	313990000	0	1146800	1026700	1627400	3684700	3124000	6157800	5472300	5470200	2348900	1002800	6993200	17548000	16925000
445	3912700	13427000	11783000	16055000	14320000	12874000	20057000	27153000	46722000	42683000	61173000	89493000	76664000	82550000	72488000	100940000	83207000	140220000	140350000	227720000	186300000	228650000	284170000	350160000	558410000	328310000	302410000	852940000	873850000	876880000	1982500000	2657600000	7811200000	17106000000	737550000	32860000	27282000	18055000	17248000	28276000	24406000	50419000	50771000	71476000	72611000	93135000	193530000	154240000	36703000
446	0	0	0	0	0	0	0	0	0	0	0	0	0	0	0	0	0	0	0	0	0	0	0	0	0	0	0	0	0	0	0	0	393110	568310	0	0	0	0	0	0	0	0	0	0	0	0	0	0	0
447	16262	20545	47142	200330	143770	91630	118020	186410	160900	98863	81566	0	196760	0	0	0	67962	202990	39318	0	0	0	0	0	0	0	0	0	43834	99445	0	0	706450	1193200	430190	126510	168870	0	0	0	0	0	0	0	0	0	0	0	0
448	0	0	0	0	0	0	0	0	0	0	0	0	0	0	0	0	0	0	0	0	0	0	0	0	0	0	99814	0	340400	636520	2405700	2819700	10275000	10932000	0	0	0	0	0	0	0	0	0	0	0	0	0	0	0
449	972320	2583300	2806800	3875100	1963200	3934900	5725700	8951000	6859700	10300000	11755000	14153000	12739000	10835000	7040000	12009000	12888000	22112000	24683000	34605000	21487000	39039000	55869000	62017000	77922000	102850000	104330000	156460000	175970000	170260000	468760000	955040000	2112800000	1932900000	161440000	2079200	524750	349510	0	0	0	0	374290	0	0	0	586420	1120400	0
450	157160	216370	457180	604660	660600	431110	173800	419700	626780	615050	1012200	383780	629280	109990	67851	265100	111860	172550	288140	878530	0	113080	998950	498760	362770	635010	765780	1325500	2003400	3051700	10281000	13163000	23913000	21862000	5598700	1735100	380160	103010	441340	735820	1219300	1665600	2124000	1253600	0	0	0	0	0
451	0	147730	190240	103490	90351	191610	94485	345680	0	144680	220420	151470	670630	0	0	0	0	193070	0	942430	461340	0	1317900	1703500	0	0	1531100	370310	695620	250160	577240	769220	25154000	18872000	0	3133400	8636300	4596700	1126300	9122700	1382500	0	0	0	0	0	0	0	0
452	0	0	0	0	0	0	0	0	0	0	0	0	0	0	0	0	0	0	0	0	0	0	0	0	0	0	0	0	0	1569100	9236800	27514000	28676000	26224000	3665900	7090600	13381000	7675200	8033200	7817900	18234000	899940	0	0	0	1545400	3056200	5857000	0
453	122770	411700	416530	379630	349270	162400	223970	210170	223310	176750	254230	0	366420	0	0	512340	0	702230	1085600	1297000	1423200	2237200	1453800	1560800	15044000	1337900	0	566330	1018700	5134800	17825000	19375000	30795000	21968000	4072300	6429700	8483400	5260300	5256200	3300500	12608000	1577200	1942800	1276600	3345000	1120600	1066900	0	0
454	0	0	0	0	0	0	0	0	0	0	0	0	0	0	0	0	0	0	0	0	0	0	0	0	0	0	0	557130	1348500	1378500	1159300	1400100	1683800	1930300	1146700	0	661100	932270	883040	0	0	0	0	0	0	0	0	0	0
455	0	0	0	0	0	27223	38154	50606	0	47470	0	102360	118920	0	0	0	0	144830	122850	349520	0	0	415460	768360	160000	648040	166680	659880	1410700	578390	1261500	559160	1556800	1543300	610620	1621300	1042400	242370	421260	0	0	0	0	0	0	0	0	0	0
456	0	214650	301130	445360	738030	458090	1185700	1570500	1236300	1696700	2005500	1321200	2433200	1518200	1017300	1587800	1286700	2448300	2187300	3003100	2611100	2351700	3794900	2038300	1437800	1926400	1916100	4502400	3345800	2985300	5021600	7070400	8407800	10396000	4289900	4499700	633590	0	0	0	0	0	0	0	0	0	0	0	0
457	4642500	15242000	17536000	17822000	24108000	23592000	33060000	44462000	55708000	54338000	68563000	75322000	68016000	59293000	40212000	75565000	64082000	119820000	83291000	119960000	111920000	114250000	148010000	122510000	145980000	172360000	125770000	257090000	270070000	209440000	320760000	347340000	516350000	1158400000	1283500000	240440000	2542500	2364200	1960000	2359700	1501100	2586100	2558700	2203500	5284100	3701100	4612900	6011700	9087100
458	0	0	0	0	0	0	0	0	0	0	0	0	0	0	0	0	0	0	0	0	0	0	0	0	0	0	0	0	0	0	332980	225800	954690	1289900	868080	331830	0	0	0	0	0	0	0	0	0	0	0	0	0
459	274590	1319900	1725700	1991600	2161600	1768700	1874300	1724100	3028400	3824900	4996200	3082200	1996700	0	2464500	5203300	5281500	0	1534000	3982100	0	1637900	3997100	3761200	3643800	0	2673600	3749800	4990900	3244000	6341500	3875100	10932000	27631000	21315000	5190100	613570	891760	2864600	3885000	4317700	1275300	4316300	8920500	6574800	6666800	7890900	6102500	4271200
460	58566	49228	133510	129230	183530	113870	312950	199590	238900	354320	426000	261240	380460	438650	473480	248910	944970	475850	2068500	1566600	2212800	4908400	6607300	2375300	781700	2889400	616140	3372500	5602400	4473600	7739400	8372700	12699000	2163700000	1301800000	12974000	429680	0	0	0	0	273510	0	0	1672900	967570	2021900	1435400	451450
461	0	0	0	0	0	0	0	0	0	0	0	0	0	0	0	0	0	0	0	0	0	0	0	0	0	0	0	0	0	0	0	0	4729600	47187000	36534000	2918500	0	0	0	0	0	0	0	0	0	0	0	0	0
462	2102000	8050400	9710200	11426000	6136500	4880700	8389800	8309700	14129000	5939200	8012100	6759800	6778600	8846100	7006000	7915200	22356000	6333900	1781400	8116600	9889000	2168900	1431500	3613800	2690500	1920500	9922000	4868100	8268900	0	4515700	3248000	10444000	92070000	83936000	0	0	0	0	0	0	0	0	0	0	0	0	0	0
463	45208000	125880000	117520000	160980000	115000000	130660000	133950000	186500000	162440000	178450000	162780000	154830000	123730000	137260000	92410000	157820000	251620000	104050000	43766000	118970000	179680000	43144000	26044000	84012000	54677000	22544000	183000000	137840000	276510000	14773000	63695000	37964000	162700000	1320700000	846850000	20949000	3029300	9134100	2812200	0	0	808650	0	1297300	6168200	7342600	7972400	8344700	0
464	0	0	0	136850	0	113480	0	529800	789460	516170	332270	0	0	0	0	118350	0	144510	280960	215880	0	0	0	0	0	0	0	391950	0	0	0	0	0	3180600	0	0	0	0	0	0	0	0	775570	1174800	0	587960	1754300	588870	327650
465	0	0	0	0	0	0	34933	38449	0	0	0	0	0	0	74714	335070	0	0	0	0	0	0	0	0	0	0	0	0	0	0	0	0	0	829680	0	0	0	0	0	0	0	0	0	0	0	0	0	0	0
466	0	0	0	0	0	0	0	0	0	0	0	0	0	0	0	0	0	0	0	0	0	0	0	0	0	0	0	0	0	0	0	0	47322	48699000	0	0	263300	314460	0	103250	0	0	0	0	0	0	0	0	0
467	71936	365920	143490	232960	839380	0	981140	1101400	1899900	1069600	994450	1330100	945790	1096000	964540	948120	0	1184400	1002800	1585300	0	910350	1672300	820320	0	0	1007900	800750	731710	832840	645450	0	960500	9527100	0	0	634410	0	0	1711400	948950	0	0	0	0	0	0	0	0
468	166310	294020	628610	1218000	520480	421100	1853900	2184500	1871400	2552100	1898000	2670500	2626500	1433500	919270	1382500	0	753480	0	2408100	1529400	0	0	0	0	2640500	1309900	1704800	3865000	3038900	5587100	2560000	4354700	18367000	1267100	0	2264400	1584400	0	0	5240500	4025800	3979600	3705500	1907200	2707100	3489200	1060200	2016300
469	489660	1555400	1743300	2226700	1959900	1995100	2653600	3986700	4940500	4287800	3337100	3954600	4374400	2512200	3243700	2293300	4136600	0	1032700	2794500	1935300	0	1523800	0	0	0	0	3825800	5740700	3372300	1663400	5480200	8730100	6076600	1557200	6261500	0	1952400	0	3048700	4757700	0	3754800	1926600	1365100	5390800	0	2220700	2221500
470	0	525840	0	0	890070	1269200	972340	2546100	5536100	4381100	5609200	7589200	3718100	2860800	2715100	3630800	4171700	4630000	1240800	2091400	0	0	839440	0	0	2766800	0	2176000	2749500	1988700	3503700	5374800	5383900	5108600	3069300	7736400	3254100	0	3967500	0	0	0	0	0	0	0	0	0	0
471	0	422880	724640	671830	921620	193800	318390	1645500	2000500	1427600	1725100	1868900	2002900	1270100	388540	0	0	1527700	626760	968340	317400	842150	835280	0	0	673500	0	0	1799300	1639400	2184700	1627700	2993900	3432900	3541600	4215600	0	0	0	0	0	0	0	0	0	0	0	0	0
472	4241700	15865000	23291000	28405000	33455000	48026000	78502000	81731000	68999000	47224000	47567000	43433000	56085000	45631000	30726000	32406000	22751000	25977000	18364000	27039000	22459000	21531000	22437000	16875000	14182000	16115000	7129000	23470000	22773000	26985000	61049000	87450000	115750000	111860000	54951000	44041000	19301000	6944000	3179900	2889000	2813100	2679900	2061200	1849500	924690	0	328010	370900	321120
473	322170	1848700	2833300	3426200	3690200	4236300	5126900	5752200	5461800	4844400	3577500	1895100	2134700	2759700	1674300	2341000	803950	1578100	1656900	1083700	1078500	1939900	1168800	850040	309070	0	310380	320160	531430	995510	3495000	5207500	9455200	10747000	5602400	4770400	308550	0	310160	0	0	0	0	0	0	0	0	79033	0
474	0	351720	490420	511260	406740	962180	370940	1492400	1204900	142550	246570	299690	854930	0	0	625260	0	555880	0	0	0	0	0	0	0	537280	0	0	311280	0	670520	467690	2431400	2160900	474580	1555200	666880	0	0	0	0	0	0	0	0	0	0	0	0
475	0	438930	653460	0	897700	1060000	766840	1244600	959090	859030	849350	0	1157200	0	0	930140	0	847730	835210	845630	764240	773960	671060	636890	915840	0	0	0	437260	588920	0	0	1527200	2362900	1338700	1454600	0	0	0	186240	0	0	0	0	0	0	0	0	0
476	704120	4128700	3807300	4520600	3849200	2472600	4397000	5137300	5118500	4631100	5194300	5533000	4587600	2614900	1978000	4569600	3712500	6286800	5738600	4902000	5836100	10262000	10678000	5174400	3552500	4209000	4511300	7078200	5442600	4704000	10078000	8596300	10829000	14058000	4639500	2635700	348920	1877500	1361100	1428300	2437100	5163800	7037500	6493100	10171000	6597200	4459200	1315100	0
477	84788	672040	226560	232290	815470	156380	209330	279940	2994300	336640	0	3858300	3749400	0	0	4183300	0	0	0	4808700	0	0	0	0	0	0	0	493740	0	0	5898300	6557000	4935300	6115400	0	1720700	4030500	7923900	1059500	1431700	2109900	10103000	7809300	0	0	0	0	0	0
478	391740	1541300	2263100	3443700	2622500	1998500	976270	471170	341450	0	0	0	0	0	0	0	0	0	0	0	0	0	0	0	0	0	0	0	0	0	0	0	0	0	0	4013000	5203100	10754000	1171900	2286100	731780	3019400	0	0	0	3047900	0	3257400	6791400
479	0	0	0	0	0	0	0	0	0	0	0	0	0	0	0	0	0	0	0	0	0	0	0	0	0	0	0	0	0	0	231290	0	0	461260	0	0	364020	865110	0	0	0	0	0	0	0	0	0	0	0
480	0	0	0	0	0	0	0	0	0	0	0	0	0	0	0	0	0	0	0	0	0	0	0	0	0	0	0	0	0	0	0	0	0	0	0	0	0	470370	0	0	0	0	0	0	0	0	0	0	0
481	443260	1207300	2285400	1740900	1224600	948330	1239700	1175600	2553200	2427700	3422100	3614100	2529800	2292200	2496400	3982400	410300	3870200	4154500	4758900	3801500	6012500	10535000	8166500	6211000	7415300	18095000	17161000	13566000	10406000	22926000	35604000	40836000	29134000	15986000	29586000	29205000	7282900000	655760000	15547000	15065000	16953000	12808000	14900000	10712000	13596000	25040000	40940000	33498000
482	0	0	0	0	0	0	0	0	0	0	0	0	0	0	0	0	0	0	0	0	0	0	0	0	0	0	0	0	0	0	0	0	0	0	0	0	0	67088000	6381100	0	0	0	0	0	0	0	0	0	0
483	0	0	0	0	0	0	0	0	0	0	0	0	0	0	0	0	0	0	0	0	0	0	0	0	0	0	0	0	0	0	0	0	0	0	0	0	0	4737600	2157700	0	0	0	0	0	0	0	0	0	0
484	0	0	0	0	0	0	0	0	0	0	0	0	0	0	0	0	0	0	0	0	0	0	0	0	0	0	0	0	0	0	0	0	0	0	0	0	0	3919500	2941800	0	0	0	0	0	0	0	0	0	0
485	0	0	0	0	0	0	0	0	0	0	0	0	0	0	0	0	0	0	0	0	0	0	0	0	0	0	0	0	0	0	0	0	0	0	0	0	0	5966300	4651300	0	0	0	0	0	0	0	0	0	0
486	0	0	0	0	0	0	0	0	0	0	0	0	0	0	0	0	0	0	0	0	0	0	0	0	0	0	0	1194300	0	0	2346400	0	2476500	3910800	1929000	4297900	0	5043800	2130600	0	1283600	0	0	0	0	0	0	0	0
487	0	0	79662	90583	162640	79780	202890	484930	381540	349970	364760	0	0	229570	0	0	0	445900	95579	352700	0	141990	275410	284750	284220	0	416030	866450	0	279290	838590	278940	947760	725970	413030	922960	482190	834790	830200	987860	876530	0	0	0	0	0	0	0	0
488	133850	486910	676120	694330	691400	538850	925220	1585200	4212400	3841600	7017600	6195200	5942100	4459900	305240	4116900	4404500	9641800	7269600	11034000	9093900	4556500	14005000	11769000	15390000	12712000	15351000	26555000	24605000	22547000	39049000	37823000	31026000	25075000	15210000	34275000	43638000	43500000	47348000	39373000	17750000	16016000	6042400	879400	0	0	420490	0	457760
489	0	0	110500	123830	164700	97724	179700	299400	225260	115480	402840	0	460560	698160	537440	734380	1530500	1392400	971630	4123400	3838900	5823300	6681900	6273800	4256500	6873700	8592200	14016000	8916600	7184600	21514000	19028000	21886000	17272000	16205000	21765000	16698000	23690000	19481000	13679000	4283800	807860	0	0	0	0	0	503930	1114000
490	0	0	0	0	0	0	0	0	0	0	0	0	0	0	0	0	0	0	0	0	0	0	0	0	0	0	0	0	0	1482600	3488800	5792200	3482500	1987300	1030700	3505000	3465400	4143400	3222000	3109600	1483800	0	0	0	0	0	0	0	0
491	0	0	0	0	0	0	109600	0	170850	140700	203470	138060	359420	0	170960	0	0	263400	0	0	263310	0	199590	0	0	0	0	211250	322430	180040	468020	588750	458940	258590	0	352570	370440	625980	241530	264460	0	0	0	0	0	0	0	0	0
492	0	57298	139830	211380	304670	222300	513380	750080	446380	436890	327840	765040	335780	370520	0	495630	0	1001800	125720	0	159690	678550	624390	0	647750	635580	0	435680	885530	800070	3333700	0	1685300	1005500	0	0	1203500	1805800	3416400	2496500	0	0	0	0	0	0	0	0	0
493	0	0	0	0	0	0	0	110840	104870	92903	73580	0	0	0	0	0	0	50941	0	0	0	0	0	0	0	0	0	0	0	0	0	0	0	0	0	0	141660	155360	233900	0	0	0	0	0	0	0	0	0	0
494	542370	1366700	2291000	3093300	3116700	2897400	5607100	5767300	5893600	5046300	4931800	3675100	4104500	533040	1930800	2603600	1475300	3973200	1481500	3072200	476920	2147100	1542200	916740	767940	875560	1248300	1696600	446110	1359900	2721700	628840	1130800	3275500	362270	4902700	6610900	7391500	10441000	9138600	7572500	2663700	1420500	2541700	3925000	2933600	1927200	0	0
495	0	0	184150	0	0	25161	146460	0	0	358620	0	754250	618410	0	0	0	0	0	0	270400	0	0	265740	0	0	877590	471130	646860	455770	0	513250	0	0	0	0	551020	726970	893990	1164900	1132800	1138500	0	0	0	0	0	0	0	0
496	0	0	0	0	0	0	0	0	0	0	0	0	0	0	0	0	0	0	0	0	0	0	0	0	0	0	0	0	0	0	0	0	0	0	0	0	2510500	0	2304700	3519600	0	0	0	0	0	0	0	0	0
497	0	0	0	0	0	0	0	0	0	0	0	0	0	0	0	0	0	0	0	0	0	0	0	0	0	0	0	0	382780	184300	2318100	1787500	1256000	728640	839510	1518500	5286500	18448000	43532000	38926000	1776600	0	0	0	0	0	0	0	0
498	0	0	0	0	0	0	0	0	0	43657	0	0	0	0	0	0	0	0	93637	195180	0	0	34626	0	0	0	37394	679750	564260	496790	880170	1507300	1749900	836530	437050	2441800	3523400	4499400	15592000	18858000	0	0	0	0	0	0	0	0	0
499	0	0	0	0	0	0	0	0	0	0	0	0	0	0	0	0	0	0	0	0	0	0	0	0	0	0	0	0	0	0	407690	0	649580	899880	184890	705800	879090	1326900	8751600	10151000	2790400	0	0	0	0	0	0	0	0
500	0	0	0	0	0	0	0	0	0	0	0	0	0	0	0	0	0	0	0	0	0	0	0	0	0	0	0	0	0	0	0	0	0	0	0	0	0	0	1139300	977420	0	0	0	0	0	0	0	0	0
501	0	0	0	0	0	0	0	115760	108760	64873	0	101440	62185	0	0	560920	0	967460	849300	1048200	704430	1176200	1230400	360120	0	1113600	929360	1370400	515490	844070	370540	579030	741700	0	0	335920	953170	1226200	6089800	6203800	203580	0	0	0	0	0	0	0	0
502	0	0	0	0	0	0	0	0	0	0	0	0	0	0	158280	0	0	0	224490	349430	0	215570	0	277600	0	0	119380	283750	227740	0	0	666630	371090	1303500	1475800	434350	1300700	34978000	77032000	20361000	552850	0	0	0	0	0	0	0	0
503	0	0	0	0	0	0	0	0	0	0	0	0	0	0	0	0	0	0	0	0	0	0	0	0	0	0	0	0	0	0	0	0	0	0	0	0	0	734700	4590400	0	0	0	0	0	0	0	0	0	0
504	0	0	0	0	0	0	0	0	0	0	0	0	0	0	0	0	0	0	0	0	0	0	0	0	0	0	0	0	0	0	0	0	0	0	0	0	0	0	485450	0	0	0	0	0	0	0	0	0	0
505	0	0	0	0	0	0	0	0	0	0	0	0	0	0	0	0	0	0	0	0	0	0	0	0	0	0	0	0	0	0	0	20088000	0	0	0	0	0	0	76924000	32555000	36948000	0	0	0	0	0	0	0	0
506	0	0	0	0	0	0	0	0	0	0	0	0	0	0	0	0	0	0	0	0	0	0	0	0	0	0	0	0	0	0	0	0	0	0	0	0	680620	186500	866880	644500	864840	189600	176810	216240	0	0	0	0	0
507	0	0	0	0	0	152780	0	0	0	0	0	540590	607150	0	0	0	0	0	0	0	0	0	320530	0	313350	0	736480	4323300	1842000	725710	1077900	3170400	2716100	3295600	473160	6432300	11728000	61875000	98549000	58056000	64284000	68147000	12450000	0	632210	5040800	9691100	15842000	21711000
508	32955	302450	345890	391060	301380	87271	117440	105840	0	118370	184180	252570	238400	0	0	0	0	0	0	0	0	0	0	0	0	0	0	0	0	0	472770	319620	184090	581700	0	0	3276500	8046900	13844000	10858000	5415000	7190400	7496000	5999500	4190400	380850	1073100	1055400	305840
509	1161300	4251800	4856400	5520700	3554600	1624700	2035700	1909400	2616700	2852000	9572800	35486000	28527000	8348700	724280	1213800	0	1593300	1469900	0	0	0	1321900	0	0	3954400	4273100	9441200	12925000	34716000	251640000	207500000	228170000	76116000	33627000	111260000	291790000	704650000	999770000	737100000	324130000	311520000	203010000	168950000	38334000	11856000	4570500	4161700	0
510	0	0	1395300	1460700	0	0	0	0	0	0	3644000	11738000	9204700	3745800	0	0	0	0	0	0	0	0	0	0	0	0	0	0	4706600	14648000	90616000	124180000	85984000	28313000	9587800	23540000	87058000	258900000	411720000	214590000	125790000	78656000	72176000	53018000	21048000	0	0	0	0
511	0	0	0	0	0	0	0	0	0	0	0	0	0	0	0	0	0	0	0	0	0	272380	0	280310	0	0	0	0	0	186360	123250	0	150260	0	0	398190	527800	633420	926670	266130	499030	458540	345890	490350	275830	0	0	0	0
512	31185	71789	121030	131170	166910	150650	212220	537430	466470	451460	533800	192790	184320	347990	533550	1187300	2961100	2250600	2747000	3675100	2678800	2820900	4469100	4636900	4366700	6045100	8165000	6680500	10149000	4960700	14816000	18727000	22091000	16841000	9070600	25052000	29858000	32680000	51491000	44506000	27767000	49164000	48011000	29733000	2889400	1744900	5197100	7890000	6971600
513	0	222860	168460	297650	225550	367370	611470	2224200	1109700	2194000	3143700	2437600	3376900	3195300	2336100	4370800	5481300	9957000	11564000	14573000	13106000	14412000	14287000	9737200	6529900	6086200	5785900	15384000	11502000	9219100	19634000	23648000	24259000	21350000	17172000	39001000	31017000	26266000	31371000	51586000	41834000	41244000	9072400	0	0	0	0	0	0
514	0	0	611170	0	0	0	0	0	0	0	0	0	0	0	0	0	0	0	0	0	0	0	0	0	0	0	0	0	0	1982900	3973800	3518400	3363500	1807900	2423700	9163400	8624900	5780100	6636200	8753800	4607500	0	0	0	0	0	0	0	0
515	0	0	0	35228	0	0	0	0	70901	0	0	56690	38046	41807	90848	62501	88412	111210	0	129400	197190	200540	160760	0	116000	229370	147030	401370	370070	367390	1072800	721850	783700	1429300	1199600	11284000	17224000	9950900	8155800	7972600	5730300	2844400	3209000	377710	0	0	0	0	0
516	72041	493460	1061200	953840	1436200	1315800	2291800	3272400	3527400	2932900	3935300	3816600	4406400	3775100	2490800	4013300	4250800	6828600	6057700	10921000	6727600	4891900	5240500	5306000	4061200	5079400	5011200	11034000	8801300	8219200	12882000	14372000	19777000	20817000	20183000	34227000	54663000	55715000	50870000	58251000	42417000	31621000	24943000	14395000	2861600	412090	412420	725780	848590
517	0	0	0	0	0	0	0	0	0	0	0	0	0	0	0	0	0	0	0	0	0	0	0	0	0	0	0	0	0	0	0	0	0	0	0	450370	641640	330560	943590	786250	274590	490450	241020	0	0	0	0	0	0
518	8974500	23070000	32172000	42423000	42944000	43224000	66966000	103760000	136460000	139000000	198980000	264740000	362940000	489000000	261100000	394970000	149080000	226140000	179940000	255650000	246090000	314230000	289260000	277850000	313400000	398510000	428380000	451880000	394190000	360790000	515420000	485700000	483150000	564020000	398690000	777750000	853400000	1381000000	1782700000	1102100000	405220000	289230000	162020000	248770000	254580000	258010000	375540000	389320000	169200000
519	1675200	3581200	4885200	6634700	6016000	7417300	12847000	22271000	30336000	37426000	59957000	82086000	111500000	166560000	72134000	119290000	27819000	55706000	58739000	57491000	76972000	95380000	90992000	88901000	97865000	125230000	157240000	103020000	142820000	98076000	177220000	152550000	192350000	168840000	133470000	278870000	367530000	430340000	727000000	467480000	153970000	55301000	40340000	66009000	77824000	108280000	153200000	192150000	161780000
520	0	0	0	0	0	24418	0	38648	0	0	43963	0	0	0	0	0	0	0	0	0	0	0	0	0	0	0	0	142700	154910	0	562110	547770	378950	593260	0	0	1459000	1525800	1706800	1369700	1034200	0	0	0	0	0	0	0	0
521	130240	3139900	3854800	4677100	3731000	2271500	1815200	2915600	3856800	3898500	5046900	7827900	8236800	6841800	3797300	4010100	2047000	4057400	1433200	2787700	1819300	3423000	7319500	4505300	2032500	7267700	6822700	18754000	21066000	22194000	30622000	31530000	56471000	46040000	20853000	75619000	155850000	235280000	220830000	201800000	145500000	8401300	0	0	0	0	0	190290	0
522	0	0	0	0	0	0	0	0	0	0	0	0	0	0	0	0	0	0	0	0	0	0	0	0	0	0	0	0	0	0	0	0	0	0	0	0	4402300	6806100	5843500	9249000	3527900	0	0	0	0	0	0	0	0
523	0	0	0	0	0	0	0	0	0	0	0	0	0	0	0	0	0	0	0	0	0	0	0	0	0	0	0	0	0	0	0	0	0	0	0	0	2058500	3749300	4043000	4420600	0	0	0	0	0	0	0	0	0
524	0	0	0	0	0	0	0	0	0	0	0	0	0	0	0	0	0	0	0	0	0	0	0	0	0	0	0	0	0	0	0	0	0	0	0	0	2017700	7146100	2133200	4978900	2124200	1797300	0	0	0	0	0	0	0
525	0	0	43936	0	0	0	55200	97825	91884	62484	76276	0	0	0	0	0	0	0	0	0	0	0	0	0	0	0	0	0	0	0	0	0	432810	1193600	790080	0	903890	1372200	1266600	2366600	0	0	0	0	0	0	0	0	0
526	0	72934	64120	91033	324630	312940	372030	568530	0	148660	663150	0	466420	0	0	0	0	0	218990	0	0	504960	1199200	0	0	0	417330	88426	1408700	213730	1696100	1681800	15129000	18629000	1707400	5860100	16292000	21532000	10866000	20275000	3721400	0	0	0	0	0	458420	0	0
527	0	0	114900	116080	0	0	0	0	0	184240	0	0	512320	631590	0	0	0	918300	780160	1107300	1187900	1600200	1104700	1318700	1464100	1523000	2031100	2915100	2319700	2780000	3906300	2404200	2636100	2699600	1466800	3738100	5258200	4378300	5372300	10481000	2770300	3524200	916820	1749500	1270400	984350	1419700	5043400	6731200
528	0	0	0	0	0	0	0	0	0	114520	369150	0	294020	803130	357740	2492300	440960	1451900	475600	528080	0	766920	1280300	686850	680420	735260	508510	3289400	1015100	379220	4622200	6023600	2759500	499270	0	1582300	3941100	1627500	3507800	4679100	2515200	2439400	1242700	1271200	0	0	2237900	3377300	2233100
529	0	51096	57102	59450	68683	93996	59699	454090	139000	246740	367110	164060	355980	397330	0	369010	0	1745100	1045600	793370	225940	640280	1034000	439090	0	190360	139530	373670	1167500	387170	1255500	411690	392530	236430	417220	826630	2088500	774520	1033600	824360	1610000	199340	586440	0	0	0	0	0	0
530	0	0	0	0	0	0	0	0	0	0	0	0	0	0	0	0	0	0	0	0	0	0	0	0	0	0	0	0	0	0	0	0	0	11022000	0	0	20628000	25658000	25343000	0	21516000	0	0	0	10539000	0	0	0	0
531	0	0	0	0	0	0	0	0	0	0	0	0	0	0	0	0	0	0	0	0	0	0	0	0	0	0	0	0	0	0	0	0	0	0	0	0	5759400	8417600	6798200	3211400	0	0	0	0	0	0	0	0	0
532	0	0	0	0	0	0	0	0	0	0	0	0	0	0	0	0	0	0	0	0	0	0	0	0	0	0	0	0	0	0	0	473590	684220	0	2507900	3469100	6087800	10275000	9278300	7070900	1453100	0	0	0	0	0	0	0	0
533	0	0	0	0	0	0	0	0	0	0	0	0	0	102120	0	0	0	0	0	0	0	0	183000	0	0	0	200010	0	168780	291190	0	1113600	824700	1871300	1624300	4596700	8661300	9345500	6271300	5657700	1353400	572840	0	1449100	1187400	0	488680	560630	721340
534	0	0	0	0	0	29433	0	44593	105810	65450	118260	123560	0	59712	0	0	0	111570	0	94121	78451	68671	0	170280	0	334140	101260	280930	234790	143770	954570	1124300	1983300	3818100	3814300	15450000	21004000	19840000	16770000	18251000	6068600	455120	0	0	0	0	0	0	0
535	0	0	0	0	0	0	0	0	0	0	0	0	0	0	0	0	0	0	0	0	0	0	0	0	0	0	0	0	0	0	0	0	0	0	0	560990	1508300	1384400	956230	0	0	0	0	0	0	0	214990	0	0
536	37035	89027	116790	115890	141370	109790	157810	203470	247420	245810	290270	400530	321580	278740	0	276670	0	349570	237330	332300	317110	281560	265760	251730	295350	0	331220	622610	470270	430930	622720	533730	1612000	2908800	3416600	22596000	43536000	44219000	25992000	5234000	385130	270060	0	0	0	0	0	0	0
537	230900	695340	1066100	1548300	1045400	926310	968130	1918100	2060200	1916000	2575000	3128600	1300200	970500	251310	308360	475490	1008200	1249000	1309500	2107400	1149200	1210700	278380	1478500	2147200	1869900	4663500	4133300	2419300	7724300	5240800	13743000	28855000	35818000	275390000	431180000	577040000	369330000	77784000	4103100	1054500	350770	367420	0	0	342900	0	0
538	0	0	0	0	0	35464	87749	92611	160550	512620	229260	535680	637240	102750	0	0	0	224160	91458	679730	820870	211930	635840	188280	428100	684100	257920	2108600	486920	754920	3158500	2115400	4183200	3874800	2198900	8684500	27537000	32409000	23573000	7384200	2117000	767970	1248400	325070	0	0	0	0	0
539	432190	1059400	1670200	2639800	2705400	2782100	4422500	4895100	9486800	9484400	13055000	14978000	12792000	9372800	3717600	6397100	6811100	10841000	11027000	15909000	9184000	17274000	15668000	14227000	10711000	23364000	21226000	29251000	16189000	15864000	16749000	18616000	26104000	35597000	37487000	89259000	123870000	110580000	83854000	45772000	12463000	2481900	303000	350570	0	231530	0	0	0
540	33372	89137	72552	70015	152340	82229	111320	172890	271290	250330	298990	254300	288310	302660	244370	326580	322580	552260	362900	340300	562830	503080	552140	0	0	896690	1175400	1825900	1051100	824630	1568900	3202200	1832000	6007200	2128800	17246000	26233000	27826000	21158000	9866700	1207700	0	0	0	0	0	0	0	0
541	245510	558140	870190	979200	687580	663800	1010900	2204200	2088700	2031900	2629600	4117000	2728400	2711500	1330000	2554600	1577900	3923700	2976100	4048800	2702200	4168800	5823900	5686700	9483100	13804000	10456000	21246000	18641000	21831000	36420000	73362000	171470000	333170000	243970000	839030000	1091900000	1083800000	758410000	406550000	69029000	28908000	19407000	14390000	13573000	4198000	2814800	2591300	877210
542	0	0	0	0	0	0	0	0	0	0	0	0	0	0	0	0	0	0	0	0	0	0	0	0	0	0	0	0	276130	0	360850	797980	2300200	2392600	2192300	10114000	11300000	11691000	6285000	3032500	447320	0	0	0	0	0	0	0	0
543	0	53985	56018	73437	128960	97909	237720	256920	805310	899000	807380	846370	848640	518000	0	477010	0	1916400	805760	1350400	1052700	1083400	2544200	1232900	745310	1322500	2107300	4026900	2043900	1185100	1679300	2739000	3775800	3282200	3698600	14796000	28929000	24994000	8364900	1988900	0	0	0	0	0	0	0	0	0
544	0	33957	112810	58522	505250	385660	824780	710710	1891000	1593300	2058700	2368200	2059700	2120800	398430	3778300	3253000	6798200	5594800	7216200	4699800	7578500	7479300	5428300	7258400	6973200	6259700	13585000	8788300	6003000	9316500	7354300	9107300	7715500	3743700	9893100	35145000	61240000	33357000	10385000	1423600	0	108620	0	0	0	0	0	0
545	2456000	10102000	15577000	17739000	15040000	7839700	5401600	3142600	581060	487690	327670	216010	172850	152200	0	255760	0	0	279340	116000	0	733520	309860	304690	451310	1866000	1365300	4021900	7079100	6948300	8688000	12672000	22412000	19300000	18271000	73159000	486530000	975720000	388350000	47806000	706850	0	71704	0	0	0	0	0	0
546	0	0	0	0	0	0	0	0	0	0	0	0	0	0	0	0	0	0	0	0	0	0	403230	0	0	0	0	823770	328720	530050	0	0	441140	0	0	0	2112900	1434900	691560	0	0	0	0	0	0	0	0	0	0
547	552430	820650	2367400	1923100	2331700	2321600	3196700	6100100	17486000	28879000	38747000	86047000	112000000	165170000	149240000	247270000	265680000	370850000	271920000	402810000	337880000	331350000	259300000	215650000	177720000	204690000	155420000	197850000	166510000	159150000	227020000	217670000	261120000	280270000	213730000	614160000	3474500000	3385900000	1063700000	110260000	44561000	45325000	38254000	30437000	51656000	69718000	93400000	221950000	302740000
548	217060	562360	656670	835560	1062500	1238400	1414300	3533900	9268200	17963000	42533000	66105000	95389000	106520000	95482000	161250000	166070000	281740000	201980000	281800000	169050000	212240000	227440000	147400000	141980000	134740000	128630000	139400000	144980000	103500000	148110000	118220000	207110000	195750000	121190000	424730000	2611200000	2253900000	714490000	84502000	34485000	36257000	23169000	26523000	32570000	50693000	124910000	219710000	245960000
549	0	0	0	0	0	0	0	0	0	0	0	0	0	0	0	0	0	0	0	0	0	0	0	0	0	0	0	0	0	0	0	0	0	0	0	0	4999200	3501800	1724600	0	0	0	0	0	0	0	0	0	0
550	0	0	0	0	0	27115	0	120400	97512	21853	134320	0	105690	0	0	273570	170670	226000	248390	0	0	125720	0	0	0	0	332180	0	172510	241840	929740	461210	501400	677870	0	1069700	4468200	1983500	485340	0	0	0	0	0	0	0	0	0	0
551	437380	0	0	0	863940	0	2045900	2313400	3055700	0	0	0	0	2376200	0	1685700	0	10622000	0	2057300	8346500	7386500	7603800	5506500	0	12815000	11789000	21920000	23179000	23599000	21636000	31558000	47671000	68726000	34276000	80304000	93609000	59269000	62629000	38747000	0	0	0	1363700	1981700	0	1467700	0	1562200
552	1844900	4399800	11031000	10494000	7432100	4884700	6698600	5991200	7080500	9438400	12179000	13014000	14089000	11953000	11231000	21696000	15082000	26537000	21155000	27741000	34653000	58446000	61192000	71112000	87630000	111560000	149760000	254480000	222300000	184820000	310750000	417050000	506350000	514170000	445390000	1007400000	1139700000	903300000	518580000	126150000	50991000	75273000	60311000	105150000	71281000	78011000	64710000	15315000	477320
553	0	0	0	0	0	0	0	0	0	0	0	0	0	0	0	0	0	0	186030	0	0	3492200	6148000	4026000	4892400	5123600	4540700	13955000	11560000	9818400	17561000	31947000	27609000	33421000	23689000	53922000	72815000	62830000	37939000	39499000	24899000	23985000	14327000	10215000	5201100	0	5062000	5529100	6446900
554	0	0	0	0	0	0	0	0	0	0	0	0	0	0	0	0	0	0	0	0	0	0	0	0	0	0	0	0	0	0	0	267760	2269900	4001100	6458200	22150000	35635000	21006000	5780800	0	0	0	0	0	0	0	0	0	0
555	164040	494280	1135800	964570	1016300	443610	283530	0	0	0	0	0	0	0	0	0	0	0	0	0	0	0	0	0	0	0	0	399240	0	413570	1493600	1389200	7323200	9838400	8396700	39190000	40496000	22769000	1634000	0	0	0	0	0	0	0	0	0	0
556	0	0	0	0	0	0	0	0	0	0	0	0	0	0	0	0	0	0	0	0	0	0	0	0	0	0	0	0	0	0	0	58542	46019	53175	63181	287500	196770	344760	0	0	0	0	0	0	0	0	0	0	0
557	0	0	0	0	0	0	0	0	0	0	0	0	0	0	0	0	0	0	0	0	0	0	0	0	0	0	0	0	0	0	0	0	0	0	575290	3304100	4354600	1209200	788840	0	0	0	0	1068500	2511400	432720	1240300	0	0
558	0	0	42363	45988	97444	60398	156820	278560	105870	220310	128660	0	287770	0	0	0	0	0	0	0	325040	0	352980	0	0	0	0	221440	519060	417180	418220	464000	566640	746890	942860	1843800	3833500	3856300	1879200	932020	736070	1529000	625540	1498700	4305300	1074400	0	0	0
559	0	0	0	0	0	0	0	0	0	0	0	0	0	0	0	0	0	0	0	0	0	0	0	0	0	0	0	92760	151640	0	167220	313730	1255900	2662800	905820	5857700	12390000	14619000	9192000	4905900	2891400	5235800	9354500	22181000	7772300	0	0	0	0
560	0	0	0	0	0	0	0	0	0	0	0	0	0	0	0	0	0	0	263550	0	0	0	409500	0	0	0	0	321130	0	0	999720	0	0	0	0	0	1708700	183180	186790	595770	415740	445850	181850	817850	0	0	0	0	0
561	0	0	0	0	0	0	0	0	0	0	0	0	0	0	0	0	0	0	0	0	0	0	0	0	0	0	0	0	0	0	0	0	0	0	1424300	0	2625400	0	0	0	0	0	0	0	0	0	0	0	0
563	0	0	0	0	0	0	0	0	0	0	0	0	0	0	0	0	0	0	0	0	0	0	0	0	0	0	0	0	0	0	0	0	0	0	0	0	420420	0	0	0	0	0	0	0	0	0	0	0	0
564	0	0	0	0	0	0	0	0	0	0	0	0	0	0	0	0	0	0	0	0	0	0	0	0	0	0	0	0	0	0	0	0	0	0	0	0	20389000	0	0	0	0	0	0	0	0	0	0	0	0
565	0	0	20583	0	0	0	0	0	53298	0	55269	0	187550	0	0	116460	0	191250	75265	395020	266970	187820	125010	336540	462020	1105000	164950	994400	290430	217010	1833300	927950	1805700	933960	241490	8750700	33541000	4742600	2203100	2612600	2425200	1605400	1731200	2648700	1497000	481940	440770	0	0
566	0	0	0	0	0	0	0	55378	42427	86033	0	71358	55035	0	0	0	0	0	0	0	0	0	0	0	0	0	0	0	0	0	0	0	0	0	120800	562210	1213000	195920	0	0	0	0	0	0	0	0	0	0	0
567	30565	0	0	0	110840	0	151650	341630	395330	640840	1111100	1813100	3011500	2054300	2454700	3638800	1179400	4148700	5091600	7858100	4918700	2523800	5369500	2318900	4417700	6689700	4044400	8265700	8677400	7803300	18595000	30161000	49717000	41634000	60340000	348720000	795690000	141400000	469940	0	374630	1833400	1387800	711470	0	0	0	585930	2556400
568	0	0	0	0	0	0	0	0	0	0	0	0	0	0	0	0	0	0	0	0	0	0	0	0	0	0	0	0	0	0	0	0	0	0	0	4170800	8271500	284130	0	0	0	0	0	0	0	0	0	0	0
569	0	0	0	0	0	0	0	0	0	0	0	0	156630	0	0	0	0	0	55155	214220	0	0	671260	210360	336610	702620	506320	0	110450	88708	380360	456350	665090	2030500	0	125460000	222210000	1006400	0	0	0	0	173960	670770	256360	213920	1180500	3843800	4182100
570	0	0	0	0	0	0	0	0	172070	0	214370	0	199390	0	0	0	0	0	0	340040	0	341940	0	0	0	0	0	0	219110	264080	588010	484540	213920	1161500	0	704440	2603500	0	1399300	473670	0	0	0	0	0	0	0	0	0
571	0	0	0	0	0	0	149110	177990	0	0	359790	0	0	1090000	761860	809530	0	0	261250	0	803620	2158900	407140	673760	0	645160	544210	679920	1027900	832890	0	0	0	0	0	0	0	1177500	2530100	1567300	0	0	806490	0	0	0	0	0	0
572	122810	549130	309170	0	890740	700510	0	422880	2041500	866290	0	0	0	0	0	1572500	0	0	0	2367300	0	1872400	0	1279700	0	0	0	1538900	458920	0	2092200	1858000	886400	0	0	954390	749140	0	2217000	0	1772400	0	0	0	0	0	2457500	1948600	0
573	0	0	0	0	0	331690	0	0	0	0	0	0	0	0	0	0	0	0	0	0	0	0	0	0	0	0	0	0	0	1431100	2418200	0	2032300	0	0	2473100	1657100	0	2279000	3208200	0	0	0	0	0	0	1598000	7432900	0
574	0	0	0	0	0	0	0	1570400	1704000	1547100	2190800	2913400	2714000	0	0	0	0	0	0	0	0	0	0	0	0	0	0	0	0	0	0	0	0	0	0	0	0	0	0	0	0	0	0	0	0	0	5037300	8448000	0
575	0	0	0	0	0	0	0	0	0	0	0	0	0	0	0	0	0	0	0	0	0	0	0	0	0	0	0	0	0	0	0	0	0	0	0	0	0	0	0	0	0	0	502310	0	0	0	2678300	2857900	0
576	0	592370	762640	1558100	935630	798990	1193200	150080	0	241790	228470	1320800	0	0	0	0	1101600	1636900	768090	1343400	0	1194900	2090300	1912900	0	0	0	0	0	1597500	1734900	0	0	0	0	1949600	0	0	0	0	0	0	0	0	0	0	4427100	4255400	2613400
577	1070400	515970	488260	503760	416990	0	0	0	660370	0	735560	0	636570	0	0	0	0	0	0	0	0	0	0	0	0	0	0	0	0	0	0	0	0	0	0	0	0	0	0	0	0	0	0	0	0	0	0	4760500	0
578	0	0	0	0	0	0	0	0	0	0	0	0	0	0	0	0	0	0	0	0	0	0	436040	0	0	0	0	0	0	0	0	0	0	0	0	0	0	0	0	0	0	0	0	0	0	0	0	565780	0
579	0	0	0	0	0	0	0	0	0	0	0	0	0	0	0	0	0	0	0	0	0	0	0	0	0	481140	0	0	0	0	0	0	0	0	0	0	0	0	0	0	0	0	0	0	0	0	0	790850	0
580	0	0	0	0	0	0	0	0	0	0	0	0	0	0	0	0	0	0	0	0	0	0	0	0	0	0	0	0	0	0	0	0	0	0	0	0	0	0	0	0	0	0	0	0	0	0	366870	4383100	767920
581	0	0	0	0	0	0	0	0	0	0	0	0	0	0	0	0	0	0	0	0	0	0	0	0	0	0	0	0	0	0	0	0	0	0	0	0	0	0	0	0	0	0	0	0	0	0	0	1133900	243300
582	0	0	0	0	0	0	0	0	0	0	0	0	0	0	0	0	0	0	0	0	0	0	0	0	0	0	0	0	0	0	0	0	0	0	0	0	0	0	0	0	0	0	0	0	0	0	0	4205700	964880
583	0	0	0	0	0	0	0	0	0	0	0	0	0	0	0	0	0	0	0	0	0	0	0	0	0	0	0	0	0	0	0	0	0	0	0	0	0	0	0	0	0	0	0	0	0	0	0	423170	0
584	0	0	0	0	0	0	0	0	0	0	0	0	0	0	0	0	0	0	0	0	0	0	0	0	0	0	0	0	0	0	0	0	0	0	0	0	0	0	0	0	0	0	0	0	0	0	0	2547200	0
585	0	0	0	0	0	0	0	0	0	0	0	0	0	0	0	0	0	0	0	0	0	0	0	0	0	0	0	0	0	0	0	0	0	0	0	0	0	0	0	0	0	0	0	0	0	0	0	848980	0
586	0	0	0	0	0	0	0	0	0	0	0	0	0	0	0	0	0	0	0	0	0	0	0	0	0	0	0	0	0	0	0	0	0	0	0	0	0	0	0	0	0	0	0	0	0	0	0	2399900	0
587	0	0	0	0	0	0	0	0	0	0	0	0	0	0	0	0	0	0	0	0	0	0	0	0	0	0	0	0	0	0	0	0	0	0	0	0	0	0	0	0	0	0	0	0	0	0	0	4444600	0
588	0	0	156530	0	187730	82206	0	0	170170	0	188630	0	0	0	0	0	0	0	0	0	0	0	0	0	0	0	0	0	0	0	0	0	0	0	0	0	0	0	0	0	0	0	306250	0	0	0	369580	1240300	0
589	0	0	0	0	0	0	0	0	0	0	0	0	0	0	0	0	0	0	0	0	0	0	0	0	0	0	0	0	0	0	0	0	0	0	0	0	0	0	0	0	0	0	0	0	2902900	468710	0	4252900	0
590	0	364500	217330	280160	277960	482790	346800	752440	1220300	915000	1349700	580470	327950	599290	0	0	0	0	719580	0	0	0	1341500	0	0	0	0	0	806010	0	2836500	697100	2060200	510490	0	1280700	1972400	0	0	0	2400300	798330	0	993020	1648700	380280	4391200	10263000	3617300
591	0	0	0	0	0	0	0	0	0	0	0	0	0	0	0	0	0	0	0	0	0	0	0	0	0	0	0	0	0	0	0	0	0	0	0	0	508820	0	0	0	274050	0	0	0	0	0	1555500	1363100	526820
592	0	0	0	0	0	0	0	0	0	0	0	0	0	0	0	0	0	0	0	0	0	0	0	0	0	0	0	0	28972	0	0	0	0	86579	0	0	0	0	0	270930	305710	120430	518980	498370	248200	201190	911970	1488500	425900
593	0	0	0	0	199780	0	0	0	0	0	0	0	674660	0	0	0	0	0	0	0	0	0	0	0	0	0	0	0	875850	0	1836400	1378100	0	0	1396100	0	2313600	2244800	2164800	0	2696500	2620600	3243700	3028300	0	4838700	7248200	8517000	6096100
594	0	0	0	0	0	0	0	0	0	0	0	0	0	0	0	0	0	0	0	0	0	0	0	0	0	0	0	0	0	0	0	0	0	0	0	0	0	796660	800420	0	0	0	0	0	883410	779420	1500500	1995000	0
595	0	0	0	0	0	0	0	0	0	0	0	0	0	0	0	0	0	0	0	0	0	0	0	0	0	0	0	0	0	0	0	0	0	0	0	0	0	0	0	0	0	0	0	0	0	0	477030	929360	0
596	0	0	0	0	0	0	0	0	0	0	0	0	0	0	0	0	0	0	0	0	0	0	0	0	0	0	0	0	0	0	0	0	0	0	0	0	0	0	0	0	0	0	0	0	0	2793200	3966300	6564000	0
597	0	0	0	0	0	0	0	0	0	0	0	0	0	0	0	0	0	0	0	0	0	0	0	0	0	0	0	0	0	0	0	0	0	0	0	0	0	0	0	0	0	174980	0	0	404990	1399900	2609000	5200500	2061500
598	0	0	0	0	0	66990	0	0	0	0	0	0	0	0	0	0	0	0	0	0	0	0	0	0	0	0	0	0	0	434860	413060	0	326310	0	0	0	0	0	1426200	601940	562760	0	0	1186100	3050700	5831100	9740300	20691000	5702200
599	0	0	0	0	0	0	0	0	0	0	0	0	0	0	0	0	0	0	0	0	0	0	0	0	0	0	0	0	0	0	0	0	0	0	0	0	0	0	1225000	809350	1649400	10454000	21801000	43771000	47995000	69091000	144530000	221450000	82219000
600	145490	853460	1038200	1397900	1006800	991080	787300	1271400	2137600	1903000	2226700	2020500	1604100	0	0	856810	0	2176000	1541200	2663300	868090	1029200	3241600	1510900	0	1199200	922910	1154300	2541600	1756900	4087500	3718900	4711000	2950500	1200800	0	5382900	2936900	2021600	3121600	2586000	6088400	4748100	17178000	18942000	45197000	73246000	93420000	16809000
601	0	0	0	0	77549	0	0	0	263460	0	136140	0	559120	533000	1034000	265610	244740	957680	1034500	319660	1091800	1338100	1435700	0	1280300	548360	1600700	630050	617190	1041200	1080900	1747400	1405100	929000	1935600	2941000	3956900	2209000	5701800	5217600	5046700	8925300	11878000	31916000	70740000	89582000	249780000	234610000	64391000
602	0	0	0	0	0	0	0	0	0	0	0	0	0	0	0	0	0	0	0	0	0	0	0	0	0	0	0	0	115060	0	0	0	0	0	0	0	0	242800	223660	659690	304940	1457300	452970	1853200	4003400	2935200	6418900	7358800	3034300
603	0	0	0	0	0	0	0	0	0	0	0	0	0	0	0	0	0	0	0	0	0	0	0	0	0	0	0	0	0	0	0	0	0	0	0	0	0	0	0	0	0	0	0	0	762350	0	4206600	4131500	1291600
604	0	0	69234	72177	72447	69629	123780	185330	178070	201240	186960	225000	0	279240	149300	303670	0	677510	246230	0	342410	705010	626650	312030	436000	530190	451980	230590	0	376850	899170	778320	0	576480	519760	987210	716270	2218100	1292900	667570	393250	581240	1041300	838150	620330	952930	3493200	4596800	2777800
605	0	0	17535	0	0	76775	125520	132920	189630	183730	175560	0	342810	120140	87442	185390	0	217210	357310	207710	0	678120	673550	626410	474300	1578100	430810	1024900	2339100	1872000	1762100	826580	1374700	0	0	0	2271100	2999500	887250	2339900	1851200	3042700	1940900	1829200	3343100	3402500	8661900	12820000	6795100
606	31539	77238	79555	245150	143640	204500	91121	329710	278850	257490	1051900	833650	1410700	1282400	570310	1447000	610240	2410100	2222900	3488000	2936200	3843600	4357200	3635000	3536000	3570300	5149300	6306800	5741000	6809200	7905600	10744000	12455000	9392200	1096900	5350400	11055000	12498000	14145000	13209000	5471900	3583600	4723000	5857900	9367800	10560000	19618000	39471000	34112000
607	0	0	0	0	86639	0	0	0	0	0	0	0	0	0	0	0	0	0	0	0	0	321160	0	0	0	0	262320	482250	370340	203230	304230	0	0	0	0	0	324840	0	0	0	0	0	0	0	494670	376220	1240500	2193000	1831600
608	0	0	0	0	0	0	0	0	0	0	0	0	0	0	0	0	0	0	0	0	0	0	0	0	0	0	0	0	0	0	0	0	0	0	0	0	957130	0	0	0	0	0	0	0	0	0	2566700	4247900	3583300
609	0	0	0	0	0	0	0	0	0	0	0	0	0	0	0	0	0	0	0	0	0	0	0	0	0	0	0	0	0	0	0	0	0	0	0	0	0	0	0	97769	0	0	0	0	0	0	745210	1489600	1190600
610	0	0	0	0	0	0	0	0	0	0	0	0	0	0	0	0	0	0	0	0	0	0	0	0	0	0	0	468210	1206800	444580	1215400	3596500	1564700	2506500	0	1145400	1850500	4275000	3625100	5265700	1835300	1478600	1394400	2156900	5182100	6618700	11266000	26960000	22894000
611	74805	197200	227620	82337	324440	226390	547160	950710	798090	739840	732200	337710	307590	361400	0	0	0	355080	213460	413910	0	0	203010	0	0	0	0	0	0	172680	0	0	0	1097000	0	0	0	0	0	529730	363540	679910	1220500	1479800	1705600	1031800	6411900	12580000	9436100
612	0	0	0	0	0	0	0	0	41794	0	0	0	0	0	0	0	87325	0	0	0	0	0	0	0	0	0	85808	99086	83910	966530	485750	897230	513640	671460	173510	928790	207190	1303300	234140	263290	605170	413050	451840	455370	2053300	1976500	5384800	14297000	9347500
613	0	0	0	0	0	0	0	0	0	0	0	0	0	0	0	0	0	0	0	0	0	0	0	0	0	0	0	0	0	0	0	0	0	0	0	0	0	0	0	0	0	0	0	1493600	5798700	8269200	12310000	32615000	17766000
614	0	0	0	0	0	0	0	0	0	0	0	0	0	0	0	0	0	0	0	0	0	0	0	0	0	0	0	0	0	0	0	0	0	0	0	0	95108	0	0	0	0	0	0	0	0	0	495770	1035100	489790
615	0	0	0	0	0	0	0	0	0	0	0	0	0	0	0	0	0	0	0	0	0	0	0	0	0	0	0	0	0	0	0	0	0	0	0	0	0	0	0	0	0	0	0	0	0	0	785050	1816700	1035300
616	0	0	0	0	0	0	0	0	0	0	0	0	0	0	0	0	0	0	0	0	0	0	0	0	0	0	0	0	0	0	0	0	0	0	0	0	0	0	0	0	0	0	0	0	0	0	1014400	2633700	1139400
617	0	0	0	0	0	0	0	0	0	0	0	0	0	0	0	0	0	0	0	0	0	0	0	0	0	0	0	0	0	0	0	0	0	0	0	0	0	0	0	0	0	0	0	0	0	0	255900	798810	577230
618	0	0	0	0	0	0	0	0	0	0	0	0	0	0	0	0	0	0	0	0	0	0	0	0	0	0	0	0	0	0	0	0	0	0	0	0	0	0	0	0	0	0	0	0	0	0	1051800	1769500	669590
619	0	0	0	0	0	0	0	0	0	0	0	0	0	0	0	0	0	0	0	0	0	0	0	0	0	0	0	0	0	0	0	0	0	0	0	0	0	0	0	0	0	293620	413830	924320	0	1922800	6770400	10822000	6595300
620	0	0	0	0	0	0	0	0	0	0	0	0	0	0	0	0	0	0	0	0	0	0	0	0	0	0	0	0	0	0	0	0	665990	0	0	0	0	0	0	0	745550	1187100	1161600	0	1245500	1801400	4010700	19779000	9522800
621	0	0	0	0	0	0	0	0	0	0	0	0	0	0	0	0	0	0	0	0	0	0	0	0	0	0	0	0	0	0	0	0	0	0	0	0	0	0	125060	0	245330	0	1045900	0	875680	2515000	2199100	8634900	2944400
622	0	0	0	0	0	0	0	0	0	0	0	0	0	0	0	0	0	0	0	0	0	0	0	0	0	0	0	0	0	0	0	0	0	0	0	0	0	0	0	0	0	0	0	0	0	0	0	1802400	891090
623	0	0	0	0	0	0	0	0	0	0	0	0	0	0	0	0	0	0	0	0	0	0	0	0	0	0	0	0	0	0	0	0	0	0	0	0	0	0	0	0	0	0	0	0	0	0	0	2036600	1608300
624	0	0	0	0	0	0	0	0	0	0	0	0	0	0	0	0	0	0	0	0	0	0	0	0	0	0	0	0	0	0	0	0	0	0	0	0	0	0	0	0	0	0	928690	1545200	0	0	1860500	2483500	1355800
625	0	0	0	0	0	0	0	0	0	0	0	0	0	0	0	0	0	0	0	0	0	0	0	0	0	0	0	0	0	0	0	0	0	0	0	0	0	0	0	0	0	0	5857900	9098200	0	0	8841900	6863300	8030000
626	0	0	0	0	0	0	0	0	0	0	0	0	0	0	0	0	0	0	0	0	0	0	0	0	0	0	0	0	0	0	0	0	0	0	0	0	0	0	0	0	0	0	2136200	2318900	0	0	1491000	1973500	4918900
627	0	0	0	0	0	0	0	0	0	0	0	0	0	0	0	0	0	0	0	0	0	0	0	0	0	0	0	0	0	0	0	0	0	0	0	0	0	0	0	0	0	0	0	0	0	0	0	0	9023200
628	0	0	0	0	0	0	0	0	0	0	0	0	0	0	0	0	0	0	0	0	0	0	0	0	0	0	0	0	0	0	0	0	0	0	0	0	0	0	0	0	0	0	0	841750	0	2183100	1305300	9661000	37861000
629	0	0	0	0	0	0	0	0	0	0	0	0	0	0	0	0	0	0	0	0	0	0	0	0	0	0	0	0	0	0	0	0	0	0	0	0	0	0	0	0	0	0	0	0	0	0	0	334170	2098000
630	0	0	0	0	0	0	0	0	0	0	0	0	0	0	0	0	0	0	0	0	0	0	0	0	0	0	0	0	0	0	0	0	0	0	0	0	0	0	0	0	0	0	0	0	0	0	0	8242800	18553000
631	0	0	0	0	0	0	0	0	0	0	0	0	0	0	0	0	0	0	0	0	0	0	0	0	0	0	0	0	0	0	0	0	0	0	0	0	0	0	0	0	1113600	2261600	3839400	2398500	1139300	16918000	39489000	198780000	309230000
632	0	0	0	0	0	0	0	0	0	0	0	0	0	0	0	0	0	0	0	0	0	0	0	0	0	0	0	0	0	348180	0	0	0	0	0	0	0	0	0	0	0	2411700	554360	2433100	2762200	869830	13156000	40581000	45471000
633	0	0	0	0	0	0	0	0	0	0	0	0	0	0	0	0	0	0	0	0	0	0	0	0	0	0	0	0	0	0	0	0	0	0	0	0	0	0	0	0	208120	373340	0	0	564600	371180	992530	2965000	3426000
634	70279	250300	578930	718010	728160	1357400	1764700	2383600	4240000	3481800	1966000	5277700	3920100	3500800	4383800	10619000	10073000	22809000	16695000	21099000	19627000	28527000	31774000	26724000	113110000	132050000	1829400	2381900	5048900	1786000	3812000	3221800	7888500	5144600	6947400	8841400	19472000	26832000	37786000	22815000	21969000	24061000	29645000	31797000	35284000	51642000	140480000	337420000	544320000
635	0	0	0	0	0	0	0	0	0	0	0	0	0	0	0	0	0	0	0	0	0	0	0	0	0	0	0	0	0	0	0	0	0	0	0	0	0	0	0	0	0	0	0	0	0	1207600	1103200	2177300	3577900
636	0	0	0	0	0	0	0	0	0	0	0	0	0	0	0	0	0	0	0	0	0	0	0	0	0	0	0	0	0	0	0	0	0	0	0	0	0	0	0	0	0	0	0	0	0	0	1161700	741110	1525900
637	0	0	0	0	0	0	0	0	0	0	0	0	0	0	0	0	0	0	0	0	0	0	0	0	0	0	0	0	0	0	0	0	0	0	0	0	0	0	0	0	0	0	0	0	0	452360	535810	0	1084000
638	0	0	0	0	0	0	0	0	0	0	0	0	0	0	0	0	0	0	0	0	0	0	0	0	0	0	0	0	0	0	0	0	0	0	0	0	0	0	0	517650	0	0	0	0	0	0	2042700	0	1695400
639	910320	2398100	2723600	3535500	4634900	3398400	3848800	7512500	5951400	8807600	10320000	14633000	1919300	21282000	17428000	21366000	16701000	20159000	14935000	23904000	22660000	24364000	2896600	27497000	28646000	26127000	27721000	9494100	6582600	5666100	8052200	27618000	9296200	9509400	4047200	7932900	4179400	10561000	8686200	24701000	6556200	31214000	7773100	15472000	17247000	15044000	80332000	14841000	22139000
640	0	60651	0	0	0	0	0	0	0	0	0	0	0	0	0	0	0	0	0	0	0	0	0	0	0	0	0	0	0	0	0	0	0	0	0	0	0	0	0	0	0	0	0	0	0	0	133780	0	0
641	0	229120	161410	457100	286060	313700	257880	1195300	975050	579290	1287400	1269300	834010	0	0	368660	0	2978300	1120300	1891200	1657300	2501900	3847900	1731400	2688300	2801400	3270200	5508800	9535900	3701200	4626900	2864100	4279200	3839500	3437400	11463000	14137000	13320000	17807000	27641000	33973000	51284000	51077000	76650000	35648000	42482000	435590000	113320000	45978000
642	291770	0	0	0	0	0	0	0	0	0	0	0	0	0	0	0	0	0	0	0	0	0	0	0	0	0	0	0	0	0	0	0	0	0	0	0	0	0	0	0	0	0	0	0	0	0	54083000	3312600	896590
643	0	0	0	0	0	0	0	0	0	0	0	0	0	0	0	0	0	0	0	0	0	0	0	0	0	0	0	0	0	0	0	0	0	0	0	0	0	0	0	0	0	0	0	0	0	0	895120	0	0
644	0	0	0	0	0	0	0	0	0	0	0	0	0	0	0	0	0	0	0	0	0	0	0	0	0	0	0	0	0	0	0	0	0	0	0	0	0	0	0	0	0	0	0	0	0	0	1106500	0	0
645	0	0	0	0	0	0	0	0	0	0	0	0	0	0	0	0	0	0	0	0	0	0	0	0	0	0	0	0	0	0	0	0	0	0	0	0	0	0	0	0	0	0	0	0	0	0	192320	0	0
646	0	0	0	0	0	0	0	0	0	0	0	0	0	0	0	0	0	0	0	0	0	0	0	0	0	0	0	0	0	0	0	0	0	0	0	0	0	0	0	0	0	0	0	0	0	0	323940	0	0
647	0	0	0	0	0	0	0	0	0	0	0	0	0	0	0	0	0	0	0	0	0	0	0	0	0	0	0	0	0	0	0	0	0	0	0	0	0	0	0	0	0	0	0	0	0	0	3298600	0	0
648	0	0	0	0	0	0	0	0	0	0	0	0	0	0	0	0	0	0	0	0	0	0	0	0	0	0	0	0	0	0	0	0	0	0	0	0	0	0	0	0	0	0	0	0	0	99049	2940800	0	0
649	0	0	0	0	0	0	0	0	0	0	0	0	0	0	0	0	0	0	0	0	0	0	0	0	0	0	0	0	0	0	0	0	0	0	0	0	0	0	0	0	0	0	0	0	0	4211000	11656000	0	0
650	0	0	0	0	0	0	0	0	0	0	0	0	0	0	0	0	0	0	0	0	0	0	0	0	0	0	0	0	0	0	0	0	0	0	0	0	0	0	0	0	0	0	0	0	0	3192900	8758800	1372400	0
651	0	0	0	0	0	0	0	0	0	0	0	0	0	0	0	0	0	0	0	0	0	0	285290	0	0	0	0	0	0	0	0	0	0	0	0	0	0	0	0	0	0	533060	5072500	2349900	2811200	33494000	93746000	12518000	7164200
652	0	0	0	0	0	0	0	0	0	0	0	0	0	0	0	0	0	0	0	0	0	0	0	0	0	0	0	0	0	0	0	0	0	0	0	0	0	0	0	0	0	0	0	0	1084500	2042100	4641600	1002500	0
653	0	0	0	0	0	0	0	0	0	0	0	0	208130	0	0	0	0	0	0	0	0	0	0	0	0	0	0	0	0	0	0	0	0	0	0	0	0	1117200	0	600900	0	0	0	1697900	3242200	3546100	16131000	5597800	1620700
654	0	0	0	0	0	0	0	0	0	0	0	0	0	0	0	0	0	0	0	0	0	0	0	0	0	0	0	0	0	0	0	0	0	0	0	0	0	0	0	0	0	0	0	0	0	2378800	9366700	3393900	0
655	0	0	0	0	0	0	0	86858	66393	0	0	0	0	0	0	0	0	0	0	0	0	0	0	0	0	0	0	0	0	231500	0	0	0	0	0	0	258340	0	0	0	0	0	0	0	1176900	872120	2463000	867520	0
656	0	0	0	0	0	0	0	0	68066	0	0	0	0	0	0	0	0	0	0	0	0	0	289230	0	0	627960	211280	416020	355940	448790	249990	489480	456470	1263700	1195700	2177900	5454300	6471900	10334000	6037900	2008600	2536000	2769800	2534700	3587500	4986600	13119000	2843200	0
657	904530	2943100	2974500	4677400	4627000	3689100	0	4479200	0	0	0	0	0	0	0	0	0	0	5347000	10193000	8230200	11172000	15266000	0	12859000	0	8804100	14343000	20225000	0	26761000	0	26817000	0	13845000	24286000	35400000	36811000	27980000	30487000	51843000	47962000	26922000	35899000	37094000	29211000	33380000	41949000	63417000
658	141300	866060	568280	1022700	878090	1262000	1513800	3484800	4189100	5516700	5900300	9823500	8943300	7369000	5432600	10786000	7073100	13333000	14565000	11578000	19866000	18864000	14422000	10073000	12698000	12707000	8648700	17906000	20055000	15894000	23100000	13744000	17415000	24149000	14474000	28868000	28454000	29798000	30475000	44067000	33722000	60423000	45337000	57351000	39484000	33326000	44636000	72108000	57485000
659	0	0	0	0	0	0	0	521180	671750	0	903020	1175000	1144000	0	0	0	0	1879900	1501900	2062000	2030400	2651100	1981300	1905500	1813900	2175500	1722300	3129000	3218400	2598000	3436500	1964700	2740100	0	0	3820600	4884100	4177200	4513800	4032900	5321100	8048700	8396100	7675400	5436200	4487700	6874800	9552100	4449900
660	25157000	58698000	73693000	86096000	94175000	91692000	122300000	172560000	169050000	212400000	296610000	343770000	396030000	351640000	252640000	450870000	363040000	528510000	472410000	658690000	534400000	749290000	820400000	709140000	902330000	1199200000	769930000	1128500000	1111200000	1260600000	1344800000	1761100000	1582300000	2913900000	3266600000	1568500000	1731400000	1302400000	1197800000	1757300000	1744800000	2964700000	2854200000	3630700000	4613600000	4677600000	5481200000	5421200000	3102400000
661	539150	1304400	1958200	1716600	1969600	1557000	3887200	6372900	5462000	5528700	7750100	8185400	6902000	7544600	3984300	11608000	6281400	13164000	14577000	18817000	15236000	11179000	18008000	11405000	22016000	22819000	17125000	27793000	27854000	23386000	34453000	32897000	33776000	48100000	36468000	95087000	68910000	49826000	41357000	53259000	35834000	52470000	62431000	94288000	104180000	89939000	121160000	190260000	159280000
662	0	0	0	0	0	80545	0	100440	0	81335	118080	270980	0	0	0	0	0	289960	205900	284050	0	344690	212500	295880	473820	322940	160120	240730	279360	298060	1087500	312190	3056500	5642400	1869500	2932600	3641800	825290	730400	2798300	2398300	1958500	2813600	5970000	5406300	2330100	5828200	11813000	5385800
663	0	0	0	0	0	0	0	0	0	0	0	0	0	0	0	0	0	0	0	0	0	0	0	0	0	0	0	0	1553400	0	386590	5113500	1008300	1873500	1873300	31161000	77455000	8280300	1912400	4151300	3716600	4727800	11564000	29730000	49126000	46363000	62276000	76446000	26902000
664	0	0	0	0	99399	102500	0	368850	471350	276480	253510	320790	362480	203940	233340	309610	0	447970	361010	467440	408380	444010	488170	491050	767060	772840	651680	1485500	1674700	1315100	1738500	1052600	896320	343120	331800	1953000	5594700	3075800	2892200	2101000	2942300	1998000	694200	1239700	1867900	1258000	5017500	6982900	3577600
665	0	0	0	0	0	0	0	0	0	0	0	0	0	0	0	0	0	0	0	0	0	0	0	0	0	0	0	0	0	0	0	0	0	0	0	0	0	0	0	0	0	0	1236600	2272600	3465900	3707500	4865400	5078600	6699400
666	0	0	0	0	0	0	0	0	0	0	0	0	0	0	0	0	0	0	0	0	0	0	0	0	0	0	0	0	0	0	228700	405310	650800	818300	153000	561340	1363200	1645900	2681600	5046700	26027000	29019000	9063000	17413000	16640000	18744000	35525000	55474000	26743000
667	0	0	0	0	0	0	0	0	0	0	0	0	0	0	0	0	0	0	0	0	0	0	0	0	0	0	0	0	146700	0	0	0	0	0	0	0	0	0	0	0	0	454780	246460	536300	637220	412270	1047600	723620	346550
668	236200	669220	790020	1522000	1470000	971170	990470	2248100	3298700	1773300	6500300	1070200	914040	3810700	0	833520	557140	955730	464450	7159200	3883700	1360100	3006600	3945200	1033900	6203900	883510	10591000	1099800	8038500	8347700	8090000	12611000	2253900	697340	531170	12107000	6155600	5329000	8256900	7775600	15099000	36514000	151240000	206230000	194620000	202700000	194320000	71218000
669	0	0	0	0	0	0	0	0	0	0	0	0	0	0	0	0	0	0	0	0	0	0	0	0	0	0	0	286840	0	0	0	0	0	0	0	0	1046600	1104200	0	1832100	2618200	14210000	27905000	52739000	69749000	61067000	89139000	80499000	35078000
670	0	0	0	0	0	0	0	0	0	0	0	0	0	0	0	0	0	0	0	0	0	0	0	0	0	0	0	0	0	0	0	0	0	0	0	0	0	652620	0	0	0	8736700	12061000	24758000	31952000	28071000	30750000	26908000	21438000
671	0	125650	686860	0	271480	224190	0	0	0	0	0	745370	962630	810020	0	0	0	0	0	0	0	0	0	0	0	0	0	0	0	0	0	360950	240320	0	0	955350	0	2733300	5514400	15636000	7264400	16834000	21652000	49636000	52615000	39110000	37946000	37710000	21061000
672	5667600	22133000	26152000	29240000	21577000	13631000	9535100	8036400	8689100	8305000	14896000	30773000	38802000	33700000	7705400	6399200	0	4828500	2826000	2746100	1533200	800610	2104900	0	636150	2170400	2884800	5121700	3782700	3848800	5021200	8227200	10774000	21587000	28075000	116610000	76136000	86306000	137210000	219660000	431890000	483440000	562450000	857480000	1151200000	1329900000	1515200000	1554400000	1334500000
673	1151500	5811200	6876200	10821000	5923900	5407400	1191800	466480	284820	293560	0	489620	936700	445710	0	0	0	0	0	0	0	0	0	0	0	0	0	0	0	0	379910	0	1605900	601170	3230100	7883000	7242500	9585500	18684000	40553000	41356000	69212000	82871000	137600000	222460000	252150000	240450000	303750000	229590000
674	0	0	0	0	0	0	0	135840	0	0	431300	579750	218180	216720	0	0	0	0	0	0	0	0	240140	0	0	0	0	0	661330	525290	2990000	2265300	2632600	6482100	4212000	5438400	8132400	24254000	31287000	38027000	62587000	118940000	122360000	175490000	244430000	140060000	219260000	379350000	179430000
675	0	126850	354360	241220	389630	183400	640030	520210	1161700	1098200	1150400	1338200	1138000	1837000	374000	497850	0	621620	468070	614330	511880	660550	592920	360610	857890	619460	1212900	1266200	1222800	619390	296630	916740	2239600	1110300	618470	1453700	3556100	2784300	3676800	6688600	5953100	13167000	15456000	26923000	32702000	24508000	42296000	48032000	26417000
676	61319	300480	453140	497190	302260	342020	989830	1552900	1613900	1190200	822140	855400	1473700	702470	482020	1247800	658490	745720	426620	785990	0	0	435520	0	0	527760	731100	397910	899690	760950	1848900	613980	2054600	1383900	0	1047800	1740300	2873700	3635900	8820400	9043600	14376000	15108000	14844000	18475000	18393000	36221000	48186000	32970000
677	0	0	63076	75963	98893	0	203510	128020	658640	0	799750	0	0	350760	0	0	0	280930	0	0	0	0	0	0	0	0	0	0	0	0	0	0	0	0	0	1025400	1090400	604970	2014400	1199400	2822100	2533700	4179800	6173900	4698700	3729700	15147000	11052000	9361600
678	0	0	0	98498	0	130800	0	0	0	0	0	0	0	0	0	0	0	0	0	0	0	0	0	0	0	0	0	0	0	0	0	0	0	0	0	0	0	0	0	532660	907910	3898600	8390000	8007500	10164000	22836000	43403000	44743000	29428000
679	136920	114390	417540	387650	546490	552250	764330	1121000	1053800	1196200	1523300	1108900	1883700	1749800	981480	1842900	473450	2012000	2359400	2971300	2018100	3300500	4000800	5354600	4067800	5606600	4483100	7807100	7938300	17199000	37848000	37317000	30424000	18026000	19975000	25090000	20436000	25833000	32831000	59119000	75365000	121110000	123060000	208740000	239560000	272750000	461010000	466380000	115040000
680	45717	0	0	0	0	0	0	133480	0	0	0	0	322820	0	0	0	0	0	332540	0	0	952890	0	0	549260	625020	0	976130	1743200	1453900	1175600	0	3907000	2496400	465890	9387300	1524100	7696000	5789400	9323100	16226000	25662000	24887000	57184000	55731000	73121000	118420000	135250000	63489000
681	0	0	0	0	0	0	0	0	0	0	0	0	0	0	0	0	0	0	147310	0	0	0	0	0	0	0	0	370630	266570	283690	442310	567710	216610	930440	406700	764180	454060	2744300	1600500	4795200	1488300	3455000	2366300	4868900	4858100	8109400	12046000	6954000	4631500
682	317280	2029100	2636700	3440500	2419000	843340	1503100	799560	735780	927220	1272900	1783500	2269300	1277000	0	0	0	0	0	0	0	0	504960	0	0	0	0	1055500	929880	1010400	2086800	0	1814600	5987400	1162900	3405200	1902700	6370200	5508500	7281300	5848200	9887800	9247200	12766000	12256000	9961500	12257000	12449000	3583300
683	0	0	0	0	0	0	0	0	0	0	0	0	0	0	0	0	0	0	0	0	0	0	0	0	0	0	0	0	0	172870	0	0	0	509780	0	0	556000	638180	1619400	4378100	1446800	1637700	843810	5621000	15784000	18049000	8225100	11520000	4553500
684	0	0	0	0	0	0	0	0	0	0	0	0	0	0	0	0	0	0	0	0	0	0	0	0	0	0	0	0	376120	0	0	299870	0	0	0	0	1781900	1867800	0	3171400	1220300	2104200	3334800	4730500	12547000	6729100	11136000	6336400	729750
685	124080	568120	968990	1297700	1007500	406630	190600	182760	76761	79569	118670	177830	0	0	0	173460	0	0	0	0	0	0	0	0	0	0	0	647600	416260	0	291950	500920	823350	942940	0	321520	1250000	1136700	1484300	3747900	2515300	2847800	6722800	9915000	18612000	14781000	17449000	10048000	1141900
686	120400	352830	527550	397070	499150	539440	575580	1086300	899340	996750	1552400	2286100	1436200	1852900	737520	1492500	577830	706740	1479600	1807900	1431800	655590	1757600	1622300	2657400	4691800	2721900	3750000	3936100	2581600	6229100	7622100	6389700	6185500	3070400	6273500	11193000	8952000	19575000	34668000	35709000	56263000	77235000	146590000	140270000	123320000	131690000	89193000	21488000
687	1423100	3854500	5043300	6736600	6285700	5913800	8375200	11513000	12400000	8199000	12760000	14064000	13947000	8242900	7182200	8828600	8339800	8261100	9233000	7849000	8756300	6252500	5197900	931750	3378800	4516100	4126100	8647000	9405100	5230000	8841200	7974100	8987800	6323300	5161100	6538300	16857000	19725000	20714000	35721000	39817000	57258000	59763000	77933000	116500000	118940000	100500000	50492000	4006300
688	0	105780	137220	78333	141070	145470	181800	245140	274350	277940	400320	0	480350	650610	414360	396070	287200	907620	277750	514320	598300	224740	265690	521570	0	0	0	684600	642150	0	0	0	553320	1212100	0	0	806630	745220	482040	790010	622030	1246500	1270900	1759400	2738600	3463000	3530600	1716400	694310
689	0	0	0	0	0	0	0	0	0	0	0	0	0	0	0	0	0	0	0	0	0	0	0	0	0	0	0	0	183200	0	314490	723800	547760	0	269600	857670	172170	639840	591340	718030	853400	975330	1098900	3158700	2640900	5510100	5250200	2791400	824330
690	129330	0	380730	724340	933800	878210	160270	0	203440	1426300	1884300	499950	1231500	0	0	0	0	0	0	0	0	0	1469300	0	0	0	0	0	0	0	1362600	1580400	825150	196760	79688	1523300	97721	1383400	1778300	1956100	1352500	3722900	2918400	8197800	9502600	11447000	11500000	10239000	1226800
691	0	0	0	0	0	0	0	0	0	0	0	0	0	0	0	0	0	0	0	0	0	0	0	0	0	0	0	0	0	0	251960	0	0	0	0	665720	453340	1064100	1133600	4521800	5002100	3758900	6718300	13662000	16743000	24284000	24830000	22983000	1732300
692	73778	323770	440780	573280	371750	432870	283600	428210	1043700	923830	1343800	1006000	1373400	840170	0	775490	0	2264300	1892800	2622700	2168000	4496800	10461000	6804700	2968100	7855900	2812400	11260000	7181000	19494000	51552000	62006000	39209000	14511000	19065000	21756000	52532000	56789000	56975000	78452000	131370000	195410000	217960000	302780000	391800000	439930000	654120000	521610000	70145000
693	0	0	0	0	0	0	0	0	0	0	0	0	0	0	0	0	0	0	0	0	0	0	0	0	0	0	0	0	0	0	0	0	0	0	0	0	0	0	0	0	0	0	445900	1066000	1410500	1721900	3016900	2420800	0
694	0	78977	0	46760	252320	211190	88465	1148300	1010100	754180	504790	0	0	0	0	0	0	0	257870	0	0	0	0	0	0	0	0	0	0	234350	0	471940	265230	291040	263880	994140	0	0	0	2396500	1783300	2497600	3030700	4366800	9630500	21288000	27224000	15503000	823040
695	0	0	0	0	0	0	0	0	0	0	0	0	0	0	0	0	0	0	0	0	0	0	0	0	0	0	0	0	0	0	0	0	0	0	0	0	0	0	0	0	495980	0	0	1285100	1359000	1103000	2103700	311950	0
696	0	0	0	0	0	0	0	0	0	0	0	0	0	0	0	0	0	0	0	0	0	0	0	0	0	0	0	0	0	0	0	0	0	0	0	0	0	0	0	0	0	1022200	0	0	949630	999730	1051700	757880	0
697	476590	1654100	9954000	1920100	1385100	1618000	3266700	4286000	6346700	4470300	6197800	6420500	6430100	6523800	4481600	9674000	8080400	12368000	8360500	14203000	9787200	12256000	16450000	17600000	14115000	9788200	8177100	11527000	7833800	10262000	11818000	13588000	12105000	8043700	9654800	26204000	24044000	13157000	11159000	12266000	32530000	19154000	58740000	3803600	48299000	41076000	55657000	32409000	7424600
698	182550	1041700	1020200	1827800	854830	1527500	2685500	3692100	3267000	3777100	2887300	2595700	4003800	2931900	1817600	2776700	1097600	3839600	3538200	3307000	3490700	4526600	3181400	658870	2290900	544790	366450	2098700	1154600	977070	1808700	1488100	1887500	704450	1296400	800550	3798300	2053400	3977600	4964300	8015900	7543100	7841600	9910100	8979000	6147600	11833000	9207200	1960000
699	0	0	0	0	0	0	0	124800	0	149430	204510	0	0	0	0	0	0	0	598250	159790	811700	244670	0	0	0	0	0	236470	0	0	0	0	0	302840	0	1053400	1814200	990830	338260	894550	1312400	1617800	4955400	2876600	2976900	1852900	6654000	3605700	578190
700	0	0	0	0	0	0	0	0	0	0	0	0	0	0	0	0	0	0	0	0	0	0	0	0	0	0	0	0	0	0	0	0	0	0	0	0	0	0	303180	1818800	2583600	9061300	7165200	5893200	2002200	345380	10926000	2984200	210540
701	0	0	0	0	0	0	0	0	0	0	0	0	0	0	0	0	0	0	0	0	0	0	0	0	0	0	0	0	0	0	0	0	0	0	0	791930	0	0	0	0	0	0	0	1344500	1095500	0	881010	593390	0
702	0	0	0	0	0	0	0	0	0	0	0	0	0	0	0	0	0	0	0	0	0	0	0	0	0	0	0	0	0	0	0	0	0	0	0	0	0	0	0	1137400	773960	602980	1993500	2537300	14815000	4096800	6911600	7889400	356640
703	0	0	0	0	0	0	0	0	0	0	0	0	0	0	0	0	0	0	0	0	0	0	0	0	0	0	0	0	0	0	0	0	0	0	0	0	0	0	0	0	0	0	671610	1074900	2123600	0	853350	1207700	0
704	0	0	0	0	0	0	0	0	0	0	0	0	0	0	0	99469	0	0	0	0	0	0	0	0	0	0	0	0	78648	0	0	0	0	0	0	0	0	0	0	0	444990	558510	539060	1358300	2061300	612850	1533600	1628700	0
705	0	0	0	0	0	0	0	0	0	0	0	0	0	0	0	0	0	0	0	0	0	0	0	0	0	0	0	0	0	0	0	0	0	0	0	0	0	0	0	0	0	0	0	2006400	2923700	463600	780240	627720	0
706	0	0	0	0	0	0	0	0	0	0	0	0	0	0	0	0	0	0	0	0	0	0	0	0	0	0	0	0	0	0	269790	0	347060	605680	0	0	0	0	0	403230	448230	264380	205370	2150300	3263700	798990	415210	0	0
707	0	91691	384770	255560	271550	284900	170740	155050	1478400	1015100	1528100	303060	743350	0	0	632660	0	355450	0	0	0	0	0	0	0	0	0	0	0	0	0	0	0	0	0	0	0	0	0	1000300	1553300	2658400	2747600	4769500	10195000	2978700	1240500	0	0
708	0	0	0	0	0	0	0	0	0	0	0	0	0	0	0	0	0	0	0	0	0	0	0	0	0	0	0	0	0	0	0	0	0	0	0	0	0	0	0	0	0	0	323050	447640	1632100	192240	0	0	0
709	0	0	0	0	0	0	0	0	0	0	0	0	0	0	0	0	0	0	0	0	0	0	0	0	0	0	0	0	0	0	0	0	0	0	0	0	0	0	0	0	0	0	0	4024100	15541000	500930	1627700	0	0
710	0	0	0	0	0	0	0	0	0	0	0	0	0	0	0	0	0	0	0	0	0	0	0	0	0	0	0	714670	0	778210	2764300	5230800	4739400	2612100	744290	1237900	1847200	4946200	700050	494370	1171000	1720500	0	0	4148900	4284000	1339300	1077500	0
711	146260	1616900	1787400	1909500	1848700	1603700	2412900	1671500	1208400	807570	0	880550	0	888710	0	871350	0	1719400	0	2192300	2159400	2491100	1882100	0	5832900	3155900	3864800	5964700	1846700	5650500	3677800	4003600	6401900	9077800	0	909020	6238800	5897600	4880700	6557900	1923600	2684500	3476700	5691000	13819000	8731500	7244900	3182500	2516000
712	0	0	0	0	0	0	0	0	0	0	0	0	0	0	0	0	0	0	0	0	0	0	0	0	0	0	0	0	0	0	0	0	0	0	0	0	0	0	0	0	0	0	0	613310	885560	1035800	0	0	0
713	0	0	0	0	0	0	0	0	0	0	0	0	0	0	0	0	0	0	0	0	0	0	0	0	0	0	0	0	0	0	1420400	1922300	3764600	4323500	4475000	5583800	7241900	3980100	2024100	1358900	1319900	3470300	4299400	8914700	14387000	19514000	2978600	0	0
714	0	0	0	0	0	0	0	0	0	0	0	0	0	0	0	0	0	0	0	0	0	0	0	0	0	0	0	0	0	0	0	0	0	888210	0	0	0	0	0	0	0	0	0	0	0	1356200	0	0	0
715	0	0	0	0	0	0	0	0	0	0	0	0	0	0	0	0	0	0	0	0	0	0	0	0	0	0	0	0	0	0	0	0	0	0	0	0	0	0	0	0	0	0	0	3570000	16137000	28942000	6360700	0	0
716	493780	1261200	1721100	1813600	1800400	999620	1503600	1839900	1550500	2444400	3183900	4142900	3197800	915950	1983200	2789500	2144100	4068200	2894800	2337700	2894800	3259400	3437000	3404600	4535700	3265800	5378000	6255200	6050200	4463800	4529300	2432700	3381700	7914000	4640400	9548700	9555600	6614200	7218400	13876000	21943000	37720000	61644000	137690000	3873200000	8414700000	336100000	5528000	2619000
717	0	0	118010	0	135450	98014	0	0	185820	0	291310	242290	371770	0	0	492060	0	412580	0	452230	0	0	0	0	0	988890	418790	0	0	0	0	0	1066200	0	0	0	1257500	1278200	1137500	1939600	1507300	4318200	4002200	10542000	367370000	862470000	23213000	769960	0
718	0	616530	0	731060	576010	794900	1511600	2201400	1987100	2004200	2249300	2849800	4091700	3172800	3465000	6332400	1832500	9056500	7394400	9372500	6438500	8092000	12481000	4051600	4768100	8048300	7637400	15370000	28900000	20491000	16791000	12361000	8955500	5266700	3971900	13212000	18888000	14700000	19415000	19954000	27114000	12187000	16651000	17367000	78831000	306350000	46450000	20412000	19145000
719	39023	160320	209920	211810	439610	246670	669230	1172900	766140	1543500	1772900	1636500	2229200	1689400	1140900	2299300	345070	3580000	2290300	3311300	3137100	4213100	5344600	4557400	4742400	3637100	3716300	7867600	15356000	7837800	6213100	8253800	10904000	12233000	10588000	27368000	19198000	14087000	11042000	19822000	21818000	6751000	4749300	3985800	5287800	430280000	34703000	0	0
720	0	0	0	0	0	0	0	0	0	0	0	0	0	0	0	0	0	0	0	0	0	0	0	0	0	0	0	0	0	0	0	0	0	0	0	0	0	0	0	0	176230	0	0	786910	2397200	103410000	43618000	1919000	0
721	0	0	0	0	0	0	0	0	0	0	0	0	0	0	0	0	0	0	0	0	0	0	0	0	0	0	0	0	0	0	0	0	0	0	0	0	0	0	0	0	0	0	0	0	0	518900	331500	0	0
722	0	0	0	0	0	0	0	0	0	0	0	0	0	0	0	0	0	0	0	0	0	0	0	0	0	0	0	0	0	0	0	0	0	0	0	0	0	0	0	0	0	0	0	0	12719000	14463000	18956000	0	7079500
723	0	0	0	0	0	0	0	0	98274	89201	87017	0	0	0	0	0	0	139060	0	109140	0	0	0	0	0	0	0	0	0	0	0	0	0	0	0	0	0	0	0	0	0	0	0	0	242070	236670	286990	0	0
724	9043100	30803000	31195000	35842000	33494000	36718000	39605000	42975000	35906000	43199000	53061000	48556000	44629000	20206000	15114000	30655000	12136000	32990000	21492000	19997000	97175000	1052600	814190	12191000	26716000	2449800	7575600	0	2087500	1299800	27900000	6871300	0	0	0	818650	7842900	10464000	8430500	7219400	9717800	22097000	28711000	60418000	160810000	171360000	134390000	104260000	22091000
725	34176	486150	444550	783210	1326200	1017500	1220700	1720400	3020500	2308700	2955300	995500	618530	774000	514120	1733500	308940	1422100	2154100	839620	447830	2175900	1390800	0	0	868440	589180	3005500	1735700	1551900	1293800	1339000	375610	678960	377080	1035000	820460	1008500	567550	786540	482300	1008700	2152300	1475600	2403300	5374800	5265800	447580	0
726	0	0	0	0	0	0	0	0	0	0	0	1677900	0	802750	4992200	3544100	5092800	2410800	9099800	7862700	4633200	12819000	1497300	4206000	3228000	3066600	3034000	0	1528500	0	0	0	0	0	0	0	0	0	0	10927000	3189300	0	6933300	13185000	6985600	17038000	0	4777500	9050700
727	0	0	0	0	0	0	0	0	0	0	0	0	0	0	0	0	0	0	0	0	0	0	0	0	0	0	0	0	589910	0	0	0	0	0	0	0	0	0	0	1067300	0	0	0	0	0	0	0	0	0
728	0	0	0	0	0	0	0	0	59274	0	0	0	0	0	0	0	0	0	0	0	0	0	0	0	0	0	0	0	50974	0	0	0	0	0	0	0	0	0	0	122300	0	0	0	0	0	0	0	0	0
729	0	0	0	0	0	0	0	151320	173600	187450	0	0	0	0	0	0	0	0	0	0	0	0	93584	0	0	0	0	0	0	0	0	0	0	0	0	0	158280	169140	0	851640	0	0	0	0	0	0	0	0	0
730	0	0	0	0	0	0	0	0	0	0	0	0	0	0	0	0	0	0	0	0	0	0	0	0	0	0	0	0	0	0	0	0	0	0	0	0	0	0	0	2594900	522600	0	0	0	0	0	0	0	0
731	0	0	0	0	0	0	0	0	0	0	0	0	0	0	0	0	0	0	0	0	0	0	0	0	0	0	0	0	0	0	0	0	0	0	0	0	0	0	0	2858100	471850	0	0	0	0	0	0	0	0
732	0	0	0	0	0	0	0	0	0	0	0	0	0	0	0	0	0	0	0	0	0	0	0	0	0	0	0	0	0	0	0	0	0	0	0	0	0	0	0	2250500	0	0	0	0	0	0	0	0	0
733	0	0	0	0	0	0	0	0	0	0	0	0	0	0	0	0	0	0	0	0	0	0	0	0	0	0	0	0	0	0	0	0	0	0	0	0	0	0	345910	863320	0	0	0	0	0	0	0	0	0
734	0	0	0	0	0	0	0	0	0	0	89150	727080	0	93383	97032	227480	0	352970	235490	401310	335710	0	133930	0	0	341340	0	130420	103290	116010	111120	0	0	177860	152570	283230	0	0	371860	1829900	527280	846450	0	0	0	0	0	0	0
735	0	0	0	0	0	0	0	0	0	0	0	0	0	0	0	0	0	0	0	0	0	0	0	0	0	0	0	0	0	0	0	0	0	0	0	0	0	0	279220	1280200	887340	662470	261820	0	0	329420	0	0	0
736	0	0	0	0	0	0	0	0	0	0	0	0	0	0	0	0	0	0	0	0	0	0	0	0	0	0	0	0	0	0	0	0	0	0	0	417510	657310	389380	1617600	3642700	4315300	2169500	0	0	0	0	0	0	0
737	0	0	0	0	50509	76135	84141	0	132030	261790	0	0	0	0	0	0	0	0	0	0	0	0	715280	470120	0	0	0	842280	840820	1114300	2710000	2931500	3140700	6291900	1987100	9098900	11799000	9758500	18389000	31691000	37491000	22860000	159740	0	0	0	0	0	0
738	0	97616	102550	131820	103960	138910	157070	231950	279730	292390	101160	421370	0	0	0	169290	0	212670	634080	252050	861050	1516500	615910	298380	1610300	529600	2317300	2807500	1469600	921800	4754500	4856700	5878600	4591300	2569000	6863800	15524000	24360000	36954000	63031000	56110000	34783000	2282100	2163900	2074700	0	439090	2432400	1097800
739	0	0	0	0	0	0	0	0	0	0	0	0	0	0	0	0	0	0	0	0	0	0	0	0	0	0	0	0	0	0	0	1264900	764460	1258800	1767600	1423900	941980	2459500	2188000	6683900	3809300	954790	0	0	0	0	0	0	0
740	0	0	0	0	0	0	0	34544	0	0	0	0	48970	0	0	0	0	0	50476	0	0	0	224540	0	0	0	366990	150740	165520	313620	335770	272960	308730	838560	686290	1621900	2956700	6463200	2535300	43527000	31659000	781410	2184900	2898000	1446100	402850	223030	0	891640
741	0	0	0	0	0	0	0	0	0	0	0	0	0	0	0	0	0	0	0	0	0	0	0	0	0	0	0	0	0	0	0	0	0	0	0	0	0	465430	818480	2971100	1621800	0	0	0	0	0	0	0	0
742	0	0	0	0	0	0	0	0	0	0	0	0	0	0	0	0	0	0	0	0	0	0	0	0	0	0	0	0	0	0	0	0	0	0	0	0	0	0	123270	368680	202760	0	0	0	0	0	0	0	0
743	0	0	0	0	0	0	0	0	0	0	0	0	0	0	0	0	0	0	0	0	0	0	0	0	0	0	0	0	0	0	0	0	0	749510	0	0	0	0	0	1136100	782150	0	0	0	0	0	0	0	0
744	0	67446	54527	0	124950	0	133140	386500	312720	239740	314490	0	445420	0	361790	384350	526290	794810	325590	524160	344740	480710	337120	0	347780	0	0	230250	440720	0	293070	471160	633170	435070	0	458500	0	0	418420	1403600	1067400	607680	379490	0	0	0	0	0	0
745	0	0	0	0	0	0	0	0	0	0	0	165180	162400	0	0	0	0	231850	0	0	0	483900	249610	650170	0	0	501770	449160	391570	0	337310	0	0	0	0	979580	0	0	0	1500100	1275100	1081900	667000	0	0	0	0	0	0
746	0	0	0	0	0	0	0	0	0	0	0	0	0	0	0	0	0	0	0	0	0	0	0	0	0	0	0	0	0	0	0	0	0	0	0	0	0	0	669670	0	277180	390140	356380	0	0	0	261900	0	0
747	0	0	0	0	0	0	0	0	0	0	0	0	0	0	0	0	0	0	0	0	0	0	0	0	0	0	0	0	0	0	0	0	0	0	0	0	0	0	0	0	277410	2379700	0	544970	1561700	0	0	0	0
748	0	0	0	0	0	0	0	0	0	0	0	0	0	0	0	0	0	0	0	0	0	0	0	0	0	0	0	0	0	0	0	0	0	0	0	0	0	0	2062000	1199500	3214100	3388800	0	1331900	0	0	0	0	0
749	0	0	0	0	0	0	0	0	0	0	0	0	0	0	0	47180	0	0	0	0	0	0	0	0	0	0	0	0	43446	0	0	0	105260	0	0	1653900	2649700	2648500	3818600	7697100	12897000	11726000	230410	0	0	0	0	0	0
750	0	0	0	0	0	0	0	0	0	0	0	0	0	0	0	0	0	0	0	0	0	0	0	0	0	0	0	0	0	0	0	0	0	0	0	0	725580	1238000	1840700	11322000	29961000	27314000	0	0	0	0	0	0	0
751	0	0	0	0	0	0	0	0	0	0	0	0	0	0	0	0	0	0	0	0	0	0	0	0	0	0	0	0	0	0	0	0	0	0	0	0	0	0	0	0	718540	782200	0	0	0	0	0	0	0
752	0	0	0	0	0	0	0	0	0	0	0	0	0	0	0	0	0	0	0	0	0	0	0	0	0	0	0	0	0	0	0	0	0	0	0	0	0	0	0	0	1640300	2387700	0	0	0	0	0	0	0
753	0	0	0	0	0	0	0	0	0	0	0	0	0	0	0	0	0	0	0	0	0	0	0	0	0	0	0	0	0	0	0	0	0	0	0	0	0	0	0	2346900	2432900	2817500	910380	0	0	0	0	0	0
754	0	0	0	0	0	0	0	0	0	0	0	0	0	0	0	0	0	0	0	0	0	0	0	0	0	0	0	0	0	0	0	0	0	0	0	0	0	0	0	1476700	2619000	2770700	1450500	0	0	0	0	0	0
755	0	0	0	0	0	0	0	0	0	0	0	0	0	0	0	0	0	0	0	0	0	0	0	0	0	0	0	0	0	0	0	0	0	0	0	0	0	0	0	316980	743890	574930	421770	0	0	0	0	0	0
756	0	0	0	0	0	0	0	0	0	0	64277	0	0	0	0	0	0	0	0	0	0	0	0	0	0	0	220220	392580	129600	0	287060	0	993750	470620	0	96467	730360	296430	1195000	6114200	7868700	11183000	8936700	1341900	2333600	620290	371610	293350	512120
757	0	69907	177130	139480	149010	205550	177690	231470	229010	566190	290220	238360	526650	282990	510890	400770	576860	944470	358650	563650	489100	635450	890580	357160	727480	0	664060	693570	0	0	0	0	354440	610350	0	454780	171850	541020	1065400	3919900	6379500	9698200	9166300	1188700	0	0	0	0	0
758	0	0	0	0	0	0	0	0	0	0	0	0	0	0	0	0	0	0	0	0	0	0	0	0	0	0	0	0	0	0	0	0	0	0	0	0	0	0	0	0	1936500	6041400	3192200	0	0	0	0	0	0
759	0	0	0	0	0	0	0	0	0	0	0	0	0	0	0	0	0	0	0	0	0	0	0	0	0	0	0	0	0	0	0	0	0	0	0	0	0	0	0	0	494330	1966800	900850	0	0	0	0	0	0
760	0	0	0	0	0	0	0	0	0	0	0	0	0	0	0	0	0	0	0	0	0	0	0	0	0	0	0	0	0	0	0	0	0	0	0	0	0	0	0	0	74061	289730	101150	0	0	0	0	0	0
761	0	0	0	0	0	0	0	0	0	0	0	0	0	0	0	0	0	0	0	0	0	0	0	0	0	0	0	0	0	0	0	0	0	0	0	0	0	0	0	195300	0	637990	176580	0	0	0	0	0	0
762	0	0	0	0	0	0	0	51625	64907	0	15911	0	0	0	0	0	0	123360	0	145650	189950	0	0	0	0	0	0	157940	466110	205960	250680	0	0	0	0	377450	406110	2311700	2078800	34200000	50581000	173890000	34997000	265320	0	1439000	4933700	12981000	8783100
763	0	0	0	0	0	0	0	0	0	0	0	0	0	0	0	0	0	0	0	0	0	0	0	0	0	0	0	0	0	0	0	0	0	0	0	0	0	0	0	1472600	1505500	6335900	0	0	0	0	0	0	0
764	0	0	0	0	0	0	0	0	0	0	0	0	0	0	0	0	0	0	0	0	0	0	0	0	0	0	0	0	0	0	0	0	0	0	0	0	0	0	0	559150	0	1801600	0	0	0	0	898660	0	0
765	0	0	0	0	0	0	0	0	0	0	0	0	0	0	0	0	0	0	0	0	0	0	0	0	0	0	0	0	0	0	0	0	0	0	0	0	0	0	0	2131900	1530300	3426900	0	0	0	0	2351200	0	0
766	0	0	0	0	0	0	0	0	0	0	0	0	0	0	0	97322	0	0	0	0	0	0	0	0	0	0	0	0	0	129480	0	0	0	0	0	0	0	0	514730	438000	328450	864550	0	0	0	199670	391240	0	0
767	0	85412	104140	161320	115400	108920	194560	386530	450300	449970	338150	703250	437350	623790	0	564820	325980	256130	393720	526280	478770	103200	48725	0	0	0	226220	924020	704780	553080	1386700	312540	118240	0	0	0	351360	572560	358720	859780	1642400	1703000	567160	0	0	0	0	0	0
768	0	0	0	216390	190390	147840	197140	507930	284690	324180	283300	310510	368190	361570	191240	230580	0	248320	300570	273920	258550	306500	452420	0	0	0	202780	169870	0	160810	311150	248700	149110	0	0	0	0	263220	216640	392850	318440	1003300	0	264060	0	0	0	0	0
769	0	0	0	0	0	0	0	0	3483300	2415200	3793900	4043800	3811900	3938100	0	0	0	0	0	0	0	0	4351600	0	0	0	0	0	0	0	0	0	0	0	0	0	0	0	0	0	7192900	9822200	0	7154500	0	0	0	0	0
770	0	0	0	0	0	0	0	0	0	0	0	0	0	0	0	0	0	0	0	0	0	0	0	0	0	0	0	0	0	0	0	0	0	0	0	0	0	0	116910	557220	2332900	0	0	0	0	0	0	0	0
771	0	0	0	0	0	0	0	0	0	0	0	0	0	0	0	0	0	0	0	0	0	0	0	0	0	0	0	0	0	0	0	0	0	0	0	0	0	0	239300	190320	597950	0	0	0	0	0	0	0	0
772	0	0	0	0	0	0	0	0	0	0	0	0	0	0	0	0	0	0	0	0	0	0	0	0	0	0	0	0	0	0	0	0	0	0	0	0	0	0	0	114110	576270	0	0	0	0	0	0	0	0
773	0	0	0	0	0	0	0	0	0	0	0	0	0	0	0	0	0	0	0	0	0	0	0	0	0	0	0	0	0	0	0	0	0	0	0	0	0	0	3579100	5671900	53557000	662530	0	0	0	0	0	0	188980
774	0	0	0	0	0	0	0	0	0	0	0	0	0	0	0	0	0	0	0	0	0	0	0	0	3143800	0	0	0	0	0	0	0	409280	703200	530050	1951400	1073500	637800	3104500	50589000	2437900000	599710000	3150300	0	0	0	0	0	765970
775	0	0	0	0	0	0	0	0	0	0	0	0	0	0	0	0	0	0	0	0	0	0	0	0	0	0	0	0	0	0	0	0	0	0	0	0	0	0	0	467910	40685000	13191000	0	0	0	0	0	0	0
776	0	0	0	0	0	0	0	0	0	0	59002	0	0	0	0	0	0	0	0	0	0	0	0	0	0	0	0	0	0	0	111350	0	193160	0	0	0	0	0	0	0	216570	0	0	0	0	0	0	0	0
777	0	0	0	0	0	58027	74409	81533	248380	0	299000	144090	130170	96245	0	0	0	181670	193620	508020	0	615950	506670	349420	0	0	0	136050	124730	312210	144410	189520	84313	307800	84499	673510	204390	209360	230790	337880	426190	348850	538220	835180	373140	158160	529430	119570	0
778	0	132870	78175	0	150060	132600	263640	1684100	1659000	1534600	957940	338060	984070	137250	0	639280	0	270900	441270	634290	192860	1559400	2522200	448350	0	0	151690	668400	137820	588680	543390	1269000	301330	728890	188970	1175900	960170	1470600	1970600	2490100	1480300	285580	2072400	2691400	3903700	1182500	2222700	1034200	0
779	19806000	54269000	75607000	84737000	89633000	79136000	128940000	159850000	197810000	169730000	195990000	174660000	147450000	126600000	58152000	129650000	111430000	165940000	99336000	147170000	115180000	126260000	123460000	119590000	109020000	104580000	84026000	113820000	90200000	75202000	133630000	125490000	114200000	113470000	73118000	133540000	175230000	155380000	156580000	184170000	153920000	157370000	142790000	225250000	278050000	208790000	238450000	134430000	73395000
780	536310	2082200	2511500	4107800	4266900	2953800	3282800	6531900	4521400	5256600	6769100	5886300	5931800	3805700	2723200	5053700	2031900	4292000	4737500	5065900	3219800	2935000	3190300	2100300	2763800	1873300	1753700	3901700	743270	1055800	1544600	3543500	2676400	1547400	0	1419700	3005600	2032600	860220	2704500	1667800	3000300	2340500	3365200	9486000	6807600	4559600	1064000	0
781	0	0	0	69505	0	63547	98705	128640	294680	321510	185610	0	170770	90581	0	0	0	59863	0	0	0	118970	0	0	0	0	0	0	0	0	164530	0	199750	194350	0	0	0	0	0	142480	0	0	0	379750	477710	0	204250	0	0
782	166920	235450	656360	615180	764660	532860	1558600	1483400	1601300	1329200	1135100	0	1288500	642420	0	0	0	476510	310750	0	0	0	0	0	0	0	0	125240	301830	0	0	0	388560	231430	0	0	0	0	0	500000	607680	743810	1056400	2044100	1540700	0	828970	435370	385440
783	0	0	86661	0	84283	0	0	0	0	295520	0	274360	332840	0	0	0	0	0	0	0	0	0	0	0	0	0	0	0	0	0	0	0	0	0	0	0	0	0	484400	493410	0	0	0	742780	0	0	0	0	0
784	0	0	0	0	0	0	0	0	0	0	0	0	0	0	0	0	0	0	0	0	0	0	0	0	0	0	0	0	0	0	0	0	0	0	0	0	0	0	0	0	0	0	0	544040	0	0	0	563370	0
785	0	0	0	0	0	0	0	0	0	0	0	0	0	0	0	0	0	0	0	0	0	0	0	0	0	0	0	0	0	0	0	0	0	0	0	0	594010	0	564960	724490	0	0	1534400	3581100	0	0	626260	2211700	0
786	0	0	0	19985	0	0	0	0	0	0	0	0	0	0	0	0	0	0	0	0	0	0	0	0	0	0	0	0	0	0	0	0	0	0	0	0	0	0	64502	0	0	0	0	447000	0	0	0	0	0
787	0	0	0	0	0	0	0	0	0	0	0	0	0	0	0	0	0	0	0	0	0	0	0	0	0	0	0	0	0	0	0	0	0	0	0	0	0	0	0	0	0	0	0	5950800	0	0	0	0	0
788	0	0	0	0	0	0	0	0	0	0	0	0	0	0	0	0	0	0	0	0	0	0	0	0	0	0	0	0	0	0	0	0	0	0	0	0	0	0	0	0	0	0	0	21410000	0	0	0	0	0
789	0	0	0	0	0	0	0	0	0	0	0	0	0	0	0	0	0	0	0	0	0	0	0	0	0	0	0	0	0	0	0	0	0	0	0	0	0	0	0	0	0	0	555440	5296000	0	0	0	0	0
790	0	0	0	0	0	0	0	0	0	0	0	0	0	0	0	0	0	0	0	0	0	0	0	0	0	0	0	0	0	0	0	0	0	0	0	0	0	0	0	0	0	0	0	2105600	952590	0	0	0	0
791	0	0	0	0	0	0	0	0	0	0	0	0	0	0	0	0	0	0	0	0	0	0	0	0	0	0	0	0	0	0	0	0	0	0	0	0	0	0	0	630220	0	758530	1113400	5397300	3684400	0	0	0	0
792	0	0	0	0	0	0	0	0	0	0	0	0	0	0	0	0	0	0	0	0	0	0	0	0	0	0	0	0	0	0	0	0	0	0	0	0	0	0	0	0	165430	607280	0	875020	645700	0	0	0	0
793	38767	445040	361070	346930	375390	637070	1495000	1615400	1921200	1685300	2553200	3862600	2973500	1814600	1442100	2696400	438880	729610	0	0	0	0	0	0	0	0	0	0	0	0	0	0	0	0	0	0	802600	3384100	8861900	18169000	12552000	6128800	3081400	10321000	17510000	18172000	8817400	1298700	0
794	0	0	0	99648	75742	141690	52277	354830	0	311120	354540	450330	281460	0	0	0	0	0	0	0	0	388020	0	0	0	0	0	308360	245820	0	0	0	279300	0	0	0	0	0	282420	270730	838000	1383300	1201100	507840	1329900	1245200	782660	0	0
795	0	0	379060	303180	289190	350300	751500	765670	624780	479710	916450	559100	0	0	0	0	0	0	0	0	0	0	0	0	0	0	0	0	1711800	0	1499600	1396500	2184000	0	0	3127200	1925300	1777900	1547200	2274700	3049400	3152300	4176100	3890100	0	3118100	3060000	0	0
796	0	0	54315	94758	55776	0	0	0	117820	123710	0	0	181100	496900	0	552880	0	0	0	0	0	0	610540	0	0	0	0	208470	0	309290	0	1554800	770760	0	0	0	490080	951160	956460	904250	1368700	2365700	2207600	1920300	642970	0	1462500	1421100	1140900
797	2237900	8227300	12736000	14107000	16476000	14733000	17900000	22919000	28484000	23865000	33748000	32868000	43149000	54902000	42694000	45272000	36822000	47549000	46099000	34369000	40459000	57346000	69264000	69576000	41431000	49370000	75231000	106840000	109600000	119030000	81399000	292640000	146050000	108180000	76059000	125170000	164670000	184500000	145240000	226200000	294500000	345180000	218160000	195640000	166550000	158560000	141120000	128080000	235050000
798	2593300	4381200	8003000	8687300	8585600	8867400	9090600	12237000	14738000	11713000	18396000	17615000	22252000	18075000	13244000	18459000	16359000	25151000	25457000	40523000	33942000	46168000	51587000	39751000	44606000	56265000	75836000	117280000	112400000	97519000	253290000	393120000	524570000	190480000	83122000	182260000	137660000	177750000	235100000	506250000	629230000	1059200000	792930000	179100000	115230000	91844000	189940000	277460000	229640000
799	0	0	0	0	0	0	0	0	0	0	0	0	0	0	0	0	0	0	0	0	0	0	0	0	0	0	0	0	0	130160	0	437580	871000	548390	0	283220	0	0	273150	372290	812750	729840	1117700	530820	0	0	0	0	0
800	0	0	0	35059	0	38979	0	0	113740	0	0	0	0	0	0	0	0	0	0	260600	0	0	0	0	0	0	0	0	57792	0	0	0	0	0	0	438880	0	0	523510	742700	114850	914270	569930	503180	0	0	0	0	0
801	0	0	0	0	0	0	0	0	0	0	0	0	0	0	0	0	0	0	0	0	0	0	0	0	0	0	0	0	0	0	0	337130	0	0	0	0	0	0	312900	389580	365330	498760	690700	789400	0	310010	0	0	0
802	0	0	0	0	0	0	0	0	0	0	0	0	0	0	0	0	0	0	0	0	0	0	0	0	0	0	0	0	0	0	0	0	0	0	0	0	0	0	0	627480	0	1109800	869490	697460	0	0	0	0	0
803	27777	176010	228550	408560	392080	354240	1980000	3398300	6253200	12703000	8385900	6214400	9451700	3543200	3189400	5044700	2246400	7814500	4468200	14196000	6889300	9749200	13122000	14399000	13905000	24433000	23088000	35503000	22557000	10746000	23600000	23852000	31987000	25792000	9223800	52291000	83879000	96176000	127030000	179150000	151880000	290870000	273080000	305840000	185920000	58119000	12343000	3801600	0
804	0	44636	240600	272830	83956	157480	0	956460	401390	363430	1064800	0	0	0	0	0	0	0	0	0	0	0	150600	0	0	0	0	903650	172840	293540	316300	990350	2479700	1714200	743260	4104300	8341900	8634800	18406000	33766000	35640000	56904000	53258000	67122000	24238000	4142400	729760	0	0
805	0	0	0	0	0	0	0	0	0	0	0	0	0	0	0	0	0	0	0	0	0	0	0	0	0	0	0	422380	0	0	0	0	0	326220	0	529960	6359100	10140000	11189000	17027000	18114000	32354000	33068000	37736000	12317000	717050	0	0	0
806	0	0	91251	81853	49712	173400	261440	449340	0	334450	514000	209930	409500	0	0	0	0	0	0	0	0	168470	161440	177820	0	0	204620	453530	555300	0	562830	0	738800	0	531120	628250	1764000	1563800	946210	3982700	2950200	5987800	5297800	4634400	1989600	198350	0	0	0
807	0	0	38098	111070	108260	97593	137280	0	197030	0	0	0	0	0	0	0	0	0	0	0	0	0	85769	0	0	0	0	212130	0	0	140120	0	0	0	0	0	214820	681420	3509000	5578200	5902700	7971100	8813400	7704900	1377600	0	0	0	0
808	0	0	0	0	0	0	0	0	0	0	0	0	0	0	0	0	0	0	0	0	0	0	0	0	0	0	0	0	0	0	0	0	0	0	0	0	0	0	387320	967470	970300	1672000	1176100	1983300	407300	0	0	0	0
809	0	0	0	0	0	0	0	0	0	0	0	0	0	0	0	0	0	0	0	0	0	0	0	0	0	0	0	0	0	0	0	0	0	0	0	0	268390	2386200	3618200	8316200	16108000	26134000	24418000	21121000	4578300	0	0	0	0
810	65356	567970	311400	736800	1113200	1467900	733980	1773900	2218800	1906100	2169800	1611100	1277400	1736300	805910	1156500	1339100	3743700	2129700	2233900	745420	2394300	4120400	1841100	539550	1166700	1196000	3873800	2350400	895500	4859700	3293600	2020700	1129300	0	3026000	7601900	10889000	10176000	30457000	41567000	103620000	117360000	101460000	16281000	0	0	0	0
811	2321800	4974600	5607000	6669700	7008100	6948700	9093600	10994000	13110000	12237000	13595000	11071000	15176000	10757000	9747500	17161000	16379000	22189000	15617000	22926000	23372000	23545000	32312000	15155000	18840000	35852000	36884000	78663000	73193000	71256000	115780000	101350000	99270000	86468000	49973000	84278000	120680000	168140000	334420000	777730000	1040700000	2117300000	2545200000	1692800000	695520000	486170000	352270000	199340000	79560000
812	0	0	0	27397	0	0	0	43049	0	77762	0	0	0	0	0	0	0	0	0	0	0	0	0	0	0	0	0	0	0	0	0	0	0	0	0	0	0	213300	1407300	3736600	3519900	6704900	8520500	8039300	3400700	1244900	362390	0	0
813	0	0	223390	337380	0	182910	232650	585630	612630	747530	244910	982990	911920	0	0	368440	371670	0	0	2228400	0	2463600	2197300	1954900	1173700	0	0	3187800	2853800	2206600	4970200	6007800	7244900	12447000	5901300	6459200	9205200	9687600	11738000	25943000	30302000	37192000	59463000	40897000	668580	0	0	0	0
814	0	0	0	0	0	0	0	0	0	0	0	0	0	0	0	0	0	0	0	0	0	0	0	0	0	0	0	0	0	0	0	0	0	0	0	0	0	0	944130	1554300	6283900	5518700	12141000	5890600	0	0	0	0	0
815	0	0	0	0	0	0	151760	249080	228560	216600	259490	0	0	328310	0	0	0	0	0	655700	492670	0	516880	0	0	1366300	0	1150800	3102200	3254000	5527900	7353500	9393400	12362000	8544700	15013000	10239000	3294100	11419000	16405000	37054000	54868000	46715000	20796000	1857000	0	0	0	0
816	0	0	0	0	0	0	0	0	0	64876	0	0	133520	0	0	0	0	0	270370	128680	0	0	0	0	0	0	274580	482590	643190	149900	1188200	1124900	1443900	986530	711550	188640	348000	1990200	3045800	4592200	7734100	13606000	12460000	7401600	1378600	388100	0	0	0
817	0	0	0	0	0	0	0	143970	415820	116520	538830	251550	222770	0	0	0	0	0	0	0	0	0	291120	0	0	0	0	198540	209210	0	349050	182570	220540	0	0	382200	551650	1051100	846580	1397100	2478800	4479300	2894700	2042700	0	447360	383060	612820	0
818	0	43373	70623	0	0	0	0	238830	0	176270	0	0	0	0	0	202580	0	0	0	0	0	0	0	0	0	0	0	0	0	0	255220	284940	0	0	0	390310	2643200	2587600	1474800	1503300	3762100	8820000	9821900	6101000	531560	0	0	0	0
819	0	0	0	0	0	0	0	0	0	0	0	0	0	0	0	0	0	0	0	0	0	0	0	0	0	0	0	76666	0	0	0	0	0	0	0	0	500110	0	0	280510	567340	984830	798370	546210	0	0	0	0	0
820	0	0	0	0	0	0	0	0	0	0	0	0	0	0	0	0	0	0	0	0	0	0	0	0	0	0	0	0	0	0	0	0	0	0	0	701760	1356800	777070	584750	5097600	12749000	18823000	15560000	11402000	6305700	4737600	6556200	4310800	0
821	0	0	0	0	0	0	0	0	0	0	0	0	0	0	0	0	0	228670	0	0	0	220720	342430	0	0	0	371980	206460	150130	75943	87424	0	111710	0	0	0	273820	253090	239740	895640	1137600	1234900	728770	672750	704350	0	0	0	0
822	978230	4995400	6430000	7781000	7636200	8658700	12824000	16653000	22996000	20803000	31120000	19893000	28746000	25468000	20752000	23674000	29382000	40458000	17027000	39405000	15207000	30079000	50108000	41637000	41580000	38182000	29433000	37883000	32374000	25068000	40515000	34674000	36437000	29641000	20077000	60037000	83600000	108850000	135990000	230280000	217760000	204460000	231440000	277970000	152070000	21351000	3085500	1004500	673270
823	94771	516130	570750	917830	818060	905230	1169600	1652000	1863000	1888000	1931300	629960	487390	852040	697470	608790	963350	1536100	2299300	3510600	1291600	2223900	2750700	1957800	1398700	2546900	1231400	2662600	1217300	893590	1247600	2304600	1969100	2519700	675400	3213400	5579600	7304300	10109000	15879000	12619000	16990000	10450000	19686000	9038100	1017500	0	0	0
824	0	176970	437690	590430	691800	545400	1209400	1071600	2868500	1628900	1633400	1827900	1783700	1092000	366560	1102400	1273000	2469900	1421000	1133500	2085100	734960	1257900	1610300	2450400	3045500	2438500	4777700	2677200	1792300	5059600	5359500	9036900	4665800	5316800	11298000	18295000	24743000	19408000	35254000	28487000	33579000	21845000	20162000	11460000	596200	0	0	0
825	40766	99832	108360	136740	209350	187580	252780	592420	614680	888380	1662600	1117900	1855300	1000200	294540	1239700	214870	870780	237530	1156400	187640	880760	1224400	419140	299070	2324700	1978500	4559900	3592500	2394700	5832500	2620800	7761400	5116500	4717500	15401000	22093000	24777000	29100000	45395000	42155000	54649000	32475000	27160000	21948000	11627000	7206000	1539900	178570
826	0	32016	0	43160	0	0	0	0	103270	186280	174750	260580	0	0	0	286070	244120	735470	263890	891350	560750	400460	1535500	1099200	1292400	867720	760620	1757900	1266900	1126300	3692400	1395200	3569200	4925100	2057200	7489700	8930800	16731000	19066000	26663000	33521000	42468000	33392000	33752000	11092000	2369500	1219200	447010	0
827	0	53463	0	0	0	0	246560	252590	168970	269770	185290	178120	136760	0	0	0	0	284300	0	0	0	0	0	0	0	276040	0	277720	271310	211430	540870	0	619350	0	380500	891560	1055800	2502100	2681500	3514500	4921300	6003400	4682400	4436500	738370	0	0	0	0
828	34269	276390	296040	286470	594560	235970	513250	930110	915740	4232600	307410	341750	350200	236440	0	0	0	5150500	160970	468680	0	1097700	445510	302790	347900	1422200	1427800	2179600	1983900	1044100	8600400	3664200	3915300	1948300	1395100	4716500	7119400	9563700	11750000	19510000	19800000	25264000	23815000	10890000	1453600	0	0	0	0
829	0	0	0	0	0	0	0	0	0	0	0	0	0	0	0	0	0	0	0	0	0	0	0	0	0	0	0	0	0	0	0	0	0	0	0	0	0	229570	263160	202390	344020	258630	449550	264550	0	0	0	0	0
830	1186100	3528300	5127100	5134000	6861500	5754100	10623000	13534000	16995000	6783700	7449900	8254700	6954600	6566200	6243600	9558200	6796900	13654000	19711000	24619000	23057000	26351000	25602000	13023000	13219000	20822000	15417000	53602000	58360000	61086000	99036000	101290000	143200000	190720000	111780000	185160000	125120000	269730000	418070000	580500000	681350000	720650000	516630000	538560000	443470000	378750000	400770000	453040000	292410000
831	7236200	26092000	30835000	35589000	20384000	16069000	13890000	11900000	11956000	14230000	22711000	18301000	53131000	39857000	6962100	2628800	1571200	5521600	4762600	7816000	6044700	6632100	3336700	10340000	11377000	14632000	10935000	33722000	18881000	13826000	27697000	23800000	18946000	43427000	94913000	160800000	81511000	224740000	684910000	907610000	764150000	992510000	863040000	796690000	496090000	284860000	210760000	167750000	98115000
832	34170000	110380000	127380000	141870000	95845000	74511000	56734000	29430000	48666000	45451000	67136000	122550000	154150000	145210000	44815000	26211000	11041000	12177000	9611100	21151000	5241400	14829000	19042000	17510000	20845000	26953000	50894000	114410000	63903000	48704000	101300000	88465000	222990000	399860000	506330000	800310000	677450000	1107200000	2565300000	3496200000	2544700000	3087700000	2636700000	2554800000	1733400000	941290000	710880000	580140000	440330000
833	136960	2382700	4107000	3276400	2047100	1268800	1060900	955900	1312000	2021700	1911100	4070800	7977700	7092700	1038300	1354900	645370	0	0	798810	0	0	552240	0	0	0	400200	2842800	1315000	1032000	2472000	3936200	2522400	5314400	22508000	25488000	33845000	52143000	93012000	172000000	108060000	88620000	184260000	158560000	156440000	77671000	51943000	58492000	30219000
834	578910	3373300	5240400	4808800	7873000	2539000	443150	3917900	0	0	2127500	2117800	1942300	3662200	0	2928400	0	0	3217800	2652200	2118300	2864800	0	0	4396900	0	0	1227900	0	0	0	2438200	3232900	7201400	8551000	18991000	14462000	37883000	1526700	81904000	44936000	60499000	41914000	40691000	38592000	19205000	12191000	6529500	0
835	0	0	0	0	0	0	200840	289890	308000	668820	766120	564790	807210	944300	269240	1751500	0	2208700	1745600	1187500	1407800	1711400	2720200	963960	0	3815400	1113700	5300500	1980800	1260400	4868100	676150	1362200	1005800	774790	206460	5934200	9460000	7419300	15938000	9037200	13190000	10658000	3607700	0	0	0	0	0
836	0	69080	34651	0	195780	57650	422020	587710	857550	802510	975270	654630	325870	418050	253750	669360	0	1393800	607670	627180	0	224040	810560	720920	209000	443500	0	923170	616820	210270	805770	605220	612540	399250	0	1195500	1851500	1262000	1411800	5748800	3405800	4570900	3989100	2782400	429860	0	0	0	0
837	78638	585730	824040	427610	1194600	1206200	1321000	1631200	2313000	1757100	2639800	2603700	2902200	2609000	1091000	2114400	638940	4446700	3191100	3988400	1861400	1933600	1543400	497250	0	557330	702230	1243700	608910	703590	909250	851070	904010	1050300	282390	1222600	4355700	6815000	5644700	7894100	8168000	10459000	6919000	4739000	1350300	0	0	0	0
838	1423700	4143700	5467700	5942100	6889600	7177400	9186800	11753000	16064000	14778000	14984000	16325000	18695000	13654000	11936000	16282000	12866000	20729000	9732900	15032000	14708000	17667000	12680000	14358000	16124000	15093000	10618000	18239000	12906000	11073000	16951000	15434000	17033000	14951000	6188600	23656000	21433000	33560000	33086000	47859000	33739000	44810000	35344000	25523000	4970200	635080	67167	0	0
839	0	0	0	0	0	0	0	0	120580	108830	0	0	120530	0	0	0	0	0	0	0	0	0	0	0	0	0	0	0	100940	0	0	0	0	0	0	0	0	0	0	608940	510160	220790	289640	647410	0	0	0	0	0
840	0	0	0	39066	48807	202300	152610	173380	178920	104690	166010	0	125630	221220	0	0	0	0	0	327130	0	0	0	0	0	0	0	0	227290	0	0	0	0	258660	0	248750	202550	196150	0	452380	663110	295100	414370	580030	343270	0	0	0	0
841	74742	280680	423290	696990	615090	926860	1632500	3130100	2351800	1671600	1802700	757540	1162700	1008300	249850	786460	0	596200	146240	193600	314140	209380	110860	0	0	0	0	0	118930	260940	0	252530	381800	336310	0	0	391350	645800	1269900	1349300	3688900	5105200	3096800	5003200	4687600	0	0	0	0
842	1376600	3684500	5825400	7032700	5587500	7158100	10923000	12963000	13182000	13539000	14680000	13131000	11066000	7435700	6088300	10701000	3705300	11262000	4008700	7520900	2237700	4343100	5153000	228610	1213900	854960	2675400	2200900	2226900	1264600	3371100	1887600	2384800	1753800	2283000	5515300	9369900	5267500	11288000	22653000	14591000	20352000	23741000	21435000	24849000	9422700	2616700	0	0
843	0	0	0	0	131430	64320	154530	204990	409460	267160	257860	0	0	0	0	0	0	0	0	0	0	0	0	0	0	0	0	0	0	0	504500	0	0	0	0	452640	0	66606	0	0	0	0	757540	904200	882230	477070	0	0	0
844	61093	0	46708	39959	155630	154630	400590	727710	451640	943720	717840	930000	317030	287270	444350	1447100	578030	2140000	2087400	3520000	3252100	4387000	4521500	2811500	2367300	7111800	5571700	11996000	9253200	4676100	4866600	3766700	4313300	4097700	1377600	6537000	5576800	5696700	5986400	8642900	11445000	16421000	16683000	19371000	13805000	6645200	4254900	787330	687790
845	0	309880	367310	558960	413350	684080	765490	1202500	1829300	2255700	2989300	3160600	4524900	3290000	1658600	3225700	1002800	5335300	3210200	4553600	3473600	7006200	4631500	3290500	4293400	7823200	10112000	12774000	10422000	5903200	3739200	2703300	4360900	4981700	3266300	11265000	9310500	10860000	6761200	18583000	11172000	18255000	26487000	39386000	19983000	7449600	10193000	4530300	1840500
846	31148	93276	0	105070	0	124010	147370	440970	482730	476330	548060	389420	0	0	0	0	0	678900	641030	0	237080	344350	968090	309120	356280	338410	213860	613450	263110	277850	850370	464260	0	0	0	400300	906320	1030300	834340	914700	1370100	3337700	4642600	4611000	3008900	1931400	2502000	810040	0
847	0	0	0	0	0	0	0	0	0	0	0	0	0	0	0	0	0	0	0	0	0	0	0	0	0	0	0	340640	348380	186310	379260	170470	0	0	0	468140	580550	559970	550560	220480	1122500	1857100	2307500	4853100	1337500	2082400	1900700	644960	0
848	0	0	0	0	0	0	0	0	0	0	0	0	0	0	0	0	0	0	0	0	0	0	0	0	0	0	0	0	0	0	0	273760	0	0	0	149530	0	255570	243330	769460	995860	1746900	799060	2081700	943570	748220	638120	0	0
849	62899	332570	304320	564530	478880	648740	770550	1768600	2060200	1900800	1766000	1353500	207950	886390	373360	943530	947140	2104500	1286400	2500800	1944300	3367300	3880100	1383800	1266900	2210800	1141100	4165900	2480500	2866400	4657000	7448200	7652300	7907900	3706600	4683100	4845500	4103600	6173100	11623000	9934300	16172000	16348000	23828000	19985000	13758000	4912600	0	0
850	1296700	4401600	5418300	5188300	1612200	2823700	3551800	4085100	5610500	6132800	8621900	31529000	25579000	5495800	3787400	5664300	5201900	8738200	6282800	14689000	4781200	11051000	11754000	4994700	6646900	9426500	16314000	31394000	28785000	58752000	224870000	290230000	150710000	77934000	17077000	42882000	64434000	101460000	143350000	290280000	347120000	505500000	746060000	819600000	712650000	348050000	172030000	67847000	20815000
851	2264800	5041000	6690200	5918900	7871700	6604100	9928100	12149000	11786000	15121000	13777000	18559000	16378000	15077000	11412000	11442000	12956000	16776000	15652000	19757000	16226000	21569000	25286000	18868000	22160000	31124000	22918000	47107000	39476000	33964000	62137000	66506000	67367000	68199000	37689000	70503000	83175000	105650000	141580000	290560000	281560000	592460000	619790000	685900000	462930000	208120000	172980000	163830000	27323000
852	0	0	0	0	0	0	0	0	0	0	0	0	0	0	0	0	0	0	0	0	0	0	0	0	0	0	0	0	0	0	0	0	656720	696150	0	577550	2515200	4241400	12576000	28572000	37957000	69616000	73563000	89939000	56046000	41909000	26084000	4669000	0
853	0	0	0	0	0	0	0	0	0	0	0	0	0	0	0	0	0	0	0	0	0	0	0	0	0	0	0	0	172330	184590	1178500	1929700	2999100	2838000	3407500	6517000	10900000	14107000	24853000	34920000	50612000	69555000	96063000	144870000	94378000	37383000	32540000	22626000	0
854	88818	282980	201230	358920	170050	503000	681800	1211200	1220800	875080	954170	748370	1080500	1044100	414940	1159200	788610	1418100	1210000	868830	493800	3036200	1932400	1010200	1328700	1089900	2600500	4270800	3377700	1570100	4391700	4468800	4267100	4876600	1771000	6107200	5540800	5061700	11882000	19091000	21805000	45933000	77096000	130420000	91356000	43116000	33425000	10465000	0
855	361020	2133500	1894900	2252800	1493900	970330	399210	235450	0	0	0	0	0	0	0	0	0	0	0	0	0	0	0	0	0	0	0	0	0	0	0	0	0	0	0	0	1193200	2765700	15950000	28600000	37004000	59677000	77160000	120430000	117920000	43385000	27648000	13347000	4711000
856	0	0	0	0	0	0	0	62435	0	0	0	0	0	0	0	0	0	0	0	0	0	0	0	0	0	0	0	437600	183470	174060	218710	585820	1970000	2088400	1699500	5885300	6278400	13549000	28444000	61205000	84601000	132500000	113530000	226750000	210170000	105240000	49873000	960010	0
857	0	0	0	0	0	0	0	0	0	0	0	0	0	0	0	0	0	0	0	0	0	0	0	0	0	0	0	0	0	0	0	0	0	0	0	0	0	0	0	838550	1194700	2783700	4721300	5938100	4163200	0	0	0	0
858	0	0	0	46374	31802	40727	43006	0	0	0	52654	0	0	0	0	0	0	0	0	0	0	0	0	0	0	0	0	79517	0	0	117830	0	0	0	0	308250	234930	0	366260	1403500	1589700	2554800	4824800	6493300	4058900	1298200	0	0	0
859	0	0	0	0	0	0	0	0	0	0	0	0	0	0	0	0	0	0	0	0	0	0	0	0	0	0	0	0	0	0	0	269040	0	563080	0	1418800	670840	1515900	1905100	5897600	8481000	23991000	34817000	57102000	49559000	16757000	2110900	2174500	580880
860	0	0	0	0	0	0	0	0	0	0	0	0	0	0	0	0	0	0	0	0	0	0	0	0	0	0	0	250580	296670	209580	352710	279410	364450	216700	0	578280	778480	2015000	3678900	12225000	24180000	57645000	83152000	182120000	134500000	2758600	0	0	0
861	342760	974610	1444700	1648000	1327100	1513000	1092100	2020800	2495400	2229000	2198700	2860700	3116000	1716100	1490700	1700800	1753600	2275600	1626100	2110300	1952300	2324800	3170300	2429500	2257000	2890100	2715400	6037200	4903800	4801000	11689000	11197000	8848200	7785900	2101500	7822700	7763600	15748000	24439000	46259000	47793000	86414000	70424000	163130000	142110000	18544000	853980	531800	229280
862	0	0	0	0	0	0	0	0	0	0	0	0	0	0	0	0	0	0	0	0	0	0	0	0	0	0	0	0	0	0	0	0	0	1499900	0	2819500	2677300	3754700	6328600	26374000	36100000	44839000	64962000	153720000	99311000	6943800	0	0	10494000
863	0	0	0	0	0	0	0	0	0	0	0	0	0	0	0	0	0	0	0	0	0	0	0	0	0	0	0	1921700	0	0	0	0	0	3196200	2419200	0	12964000	19784000	41003000	159320000	268650000	357700000	458650000	1209800000	579820000	44382000	8510000	24112000	77624000
864	0	0	0	0	0	0	0	0	0	0	0	0	0	0	0	0	0	0	0	0	0	0	0	0	0	0	0	0	0	0	0	0	139100	161680	0	0	0	0	208070	284830	431380	472660	486660	1165400	451910	210310	0	0	0
865	0	0	0	0	0	0	0	0	0	0	0	0	0	0	0	3593300	0	0	3515600	0	0	0	0	0	0	0	0	0	0	0	0	0	3220600	2381100	0	1815400	0	0	0	4384300	1603200	7550200	13204000	24986000	21178000	9356800	3281300	0	0
866	34191	111800	68033	137040	80962	85525	0	0	0	182440	102230	0	0	0	0	0	0	0	0	797670	456670	0	389680	331230	516280	0	0	233070	0	245430	67230	0	555660	0	238000	0	0	647120	463420	1846500	2853200	9569600	13088000	12529000	11302000	3149400	522440	0	0
867	0	0	0	48448	0	0	0	0	0	0	0	0	0	0	0	0	0	0	0	0	0	0	0	0	0	0	0	0	0	0	946310	236710	763800	887070	0	110110	0	0	1512000	1386100	3954300	10068000	14298000	11160000	8384600	547920	699980	0	0
868	169240	495260	638720	525190	713800	642890	1531300	1618800	2980300	1498900	3234100	2388300	1613100	3088100	2176500	1235200	356400	1609600	2840000	3382600	105490	748620	1531900	1118600	98634	200920	893920	4474700	3925100	2033600	5481200	5191800	1787000	2999400	1581700	2461400	4739300	2693000	4665600	9769300	8175100	14938000	23332000	24827000	14533000	3464100	1357200	2004100	922350
869	0	0	0	0	48410	0	0	83826	168730	180170	120310	150730	137450	141260	0	114690	0	203840	172030	516280	478220	183370	673440	340530	0	0	402290	853480	467430	184520	452370	312420	210300	319500	218900	453680	920440	309590	355290	2084400	1144300	2402200	2762500	2448000	2283300	281400	145760	0	0
870	0	0	0	0	0	0	0	0	0	0	0	0	0	0	0	0	0	0	0	0	0	0	0	0	0	0	0	0	0	0	0	0	0	0	0	0	0	0	2535500	5253100	2635900	5720700	8929100	6372200	5108300	0	0	0	0
871	0	0	127680	113100	165540	343050	342990	542430	1055500	205150	803070	441630	0	0	0	369140	0	332460	313770	0	0	0	737210	0	0	0	985960	815290	726340	886100	1380500	1905400	1866900	477970	292470	1112500	3519100	4009700	2061500	3706600	5232100	5551700	6404600	9658400	13024000	2204800	0	0	0
872	0	0	0	0	0	0	0	0	0	0	0	0	0	0	0	0	0	0	0	0	0	0	0	0	0	0	0	0	0	0	0	0	282040	0	0	0	322460	458510	284280	419840	250980	399100	528790	1193000	1343300	476050	0	0	0
873	1179900	3838700	4895300	4838000	3712700	2723200	5347300	7424100	10337000	9095200	12450000	16347000	13428000	16795000	12938000	20082000	20372000	28794000	24186000	35671000	31525000	36203000	41935000	29939000	40429000	58143000	45572000	59704000	54999000	41431000	85846000	119300000	153850000	232750000	213440000	617400000	914430000	1226300000	959860000	1001800000	671060000	641990000	643700000	1883200000	1785400000	829030000	78449000	8393300	3403000
874	721940	4245400	5004000	6177200	4295200	3466800	1685100	1568900	1800700	1603600	2683500	7897600	4683000	7110100	817610	947930	635780	2772700	1093400	1018700	954840	6229900	3507500	3966300	10493000	9462600	7404400	6598300	12269000	14033000	22926000	24837000	28255000	40399000	25064000	50713000	76060000	75441000	63777000	89317000	61083000	102070000	126880000	192110000	154020000	146970000	93312000	41086000	3960800
875	817040	2837900	3434600	2144600	3008000	1974300	2717200	4364000	7081100	4564400	12703000	14464000	7717000	10829000	3203800	6222600	3794500	10133000	9972200	8695900	7043000	10511000	14572000	14073000	16142000	5999300	6334900	15487000	16811000	13088000	32964000	40610000	47561000	48582000	44576000	99089000	114620000	116100000	100930000	122300000	128630000	167500000	190190000	291520000	347290000	260800000	193500000	108260000	49728000
876	0	0	58672	0	0	0	52616	0	0	0	392670	111570	368900	0	0	0	0	235340	0	0	0	0	349700	0	0	361990	290250	285210	172620	0	73019	0	433470	537930	0	749250	1600900	1227400	1351300	3013800	4293100	6841100	7111400	7985100	11678000	8863800	6393600	2316800	0
877	1612600	6836700	9186700	9917200	5563400	3527400	633840	889220	248700	158860	282210	3581100	4113600	0	0	0	0	0	0	0	0	0	0	0	0	0	0	466030	2579600	3713200	4689200	5019800	4541400	4943300	4452900	16145000	7517500	16170000	36289000	78585000	77981000	128670000	181840000	220920000	272090000	210320000	102530000	39111000	7024100
878	566180	2141700	2418400	3165000	3010700	3348000	5864700	12247000	20036000	29094000	36797000	72131000	101880000	78586000	96937000	166210000	197240000	250260000	187860000	335910000	215220000	233140000	213750000	142870000	96343000	107620000	61340000	69646000	52232000	27346000	46049000	31675000	38658000	30793000	18101000	51451000	60573000	73041000	103950000	186790000	343290000	666130000	989600000	1558400000	1779000000	1759000000	500500000	207710000	218560000
879	0	0	0	0	0	0	0	0	0	0	0	0	0	0	0	0	0	0	0	0	0	0	0	0	0	0	0	0	0	0	0	0	0	0	0	0	0	0	0	0	0	582300	1128000	2644900	4707700	2908800	831900	0	0
880	3896300	14650000	16129000	19345000	17943000	16292000	24899000	32899000	44182000	42395000	63009000	75868000	96686000	83829000	67770000	87443000	55178000	86572000	66737000	101070000	91296000	126010000	124910000	76349000	73932000	94199000	115200000	200570000	229040000	183680000	161860000	162960000	223220000	256700000	176580000	290060000	422950000	373250000	373830000	531990000	667810000	1152600000	1331900000	2357900000	4282500000	2236700000	1082500000	793110000	687580000
881	0	0	143680	174940	100740	0	0	0	0	0	0	0	0	0	0	0	0	0	0	0	0	0	0	0	0	0	0	0	0	0	0	0	212160	0	0	0	362530	0	636270	1622700	784770	997110	1978300	4571400	6225600	2925000	1576900	1117100	541460
882	0	0	0	0	0	0	0	0	0	0	0	0	0	0	0	0	0	0	0	0	0	0	0	0	0	0	0	0	155310	0	0	83757	222570	0	0	793590	1292700	1114100	3453800	6205900	6004700	19336000	22678000	44333000	55600000	28527000	17166000	0	0
883	0	69249	0	0	45220	65287	78151	254900	117660	257320	113160	203970	95855	0	0	204500	0	207610	137790	252670	0	0	87529	289880	208780	816170	257570	657380	433990	466900	482640	139170	655580	552950	520620	734970	616210	191490	265160	770650	131250	2210300	2297700	7651900	7173500	6784800	3620000	675330	0
884	0	536180	292770	306120	789500	278620	466680	839620	859950	755280	705770	0	987170	0	0	374520	690220	0	0	631840	0	0	373880	752730	0	0	0	708870	0	0	0	0	0	0	0	1432200	0	878010	335630	1683400	3869800	5042400	9765500	15849000	12566000	7025500	9264700	3215400	1671700
885	0	0	0	0	0	0	0	52726	281000	243380	277700	360290	532720	0	0	470810	0	535190	390550	1120300	334710	640350	567620	275160	845250	0	636750	2417700	1906900	360670	422410	619120	1045100	1093600	856010	2404300	4253700	2380600	3490300	8105900	9451200	20577000	36675000	55360000	40297000	32148000	24549000	18659000	3843000
886	1156500	6030000	9679800	8746100	6795200	3362500	2294400	1464100	453940	42252	419360	359610	739550	237520	0	0	0	0	0	0	0	304810	239870	0	0	0	0	167070	361480	186770	213310	998250	837620	397950	1183800	418420	2986100	2440500	8009800	24646000	33572000	55724000	75526000	116030000	121560000	68355000	51471000	64293000	28474000
887	0	61341	68219	86968	85210	162430	0	249690	355000	237730	124540	0	223590	164730	193160	153630	0	207120	0	188900	225550	252170	419270	0	0	0	381080	0	185730	135060	485380	344550	237980	249760	0	249980	399080	958240	391630	1814000	1109200	3300400	3714500	9699400	7955000	4217500	2652700	4430900	4564400
888	209470	554060	1213900	825020	757800	622380	1044300	1634500	1453200	845340	1924800	784510	0	884550	0	832080	0	3589800	726850	853540	0	810820	149320	0	0	0	0	0	0	0	0	1419600	2130800	1813700	0	2387100	0	7197200	10748000	5681800	11831000	18145000	19362000	21493000	16309000	26867000	15006000	8718600	15420000
889	369110	1649200	1587500	2828400	3014300	2988100	2578400	5503000	4576100	5116800	6636600	8699900	6685000	7768400	4993400	8886600	3617500	6626700	9124500	12694000	6518000	6663700	11213000	6723100	2919100	10622000	10337000	16118000	10574000	7290800	16584000	12945000	8191800	7556400	1682600	7656600	15160000	21823000	13910000	23736000	19807000	25513000	29937000	40826000	40597000	23351000	22219000	23726000	19095000
890	2353000	4810800	6833300	9333500	8973000	8637100	8729200	4373300	7940700	5318200	9610700	6111100	13410000	9048800	9200000	9358000	12340000	14259000	11851000	8988400	16347000	10139000	21850000	25233000	22923000	22541000	7354400	28443000	24018000	21579000	48530000	54286000	117410000	17740000	13234000	27266000	37929000	45495000	36834000	70696000	89259000	159240000	173790000	138210000	118520000	75753000	65725000	64750000	69369000
891	0	0	0	0	0	0	0	0	0	0	0	0	0	0	0	0	0	0	0	0	0	0	0	0	0	0	0	0	0	0	0	0	0	0	0	0	0	0	0	0	0	1300700	4508900	2641200	0	1418700	826480	0	0
892	0	0	0	0	0	0	0	0	0	0	0	0	0	0	0	0	0	0	0	0	0	0	0	0	0	0	0	0	0	0	0	0	0	0	0	0	0	0	0	0	0	3199600	7003900	4868800	0	738750	0	0	0
893	0	0	0	0	0	0	82298	0	284610	371090	487380	887910	1235900	1163900	941670	2347800	2197200	711930	1622700	3484500	1409900	0	983040	555400	465360	0	215890	183060	0	0	0	0	0	0	0	0	378870	374400	532350	693470	999410	1157500	32209000	23476000	1050000	0	0	0	1376300
894	0	0	0	0	0	0	0	0	0	0	0	0	0	0	0	0	0	0	0	0	0	0	0	0	0	0	0	0	0	0	0	0	0	0	0	0	0	0	0	0	0	0	1886700	4013500	0	0	0	0	0
895	0	0	0	0	0	0	0	0	0	0	0	0	0	0	0	0	0	0	0	0	0	0	0	0	0	0	72557	73377	229980	0	78904	90421	230670	0	0	169330	3023100	2241600	2082800	1351700	1911700	15859000	107220000	162290000	34402000	1745200	0	0	0
896	0	0	0	0	0	0	0	0	0	0	0	0	0	0	0	0	0	0	0	0	0	0	0	0	0	0	0	0	0	0	0	0	0	0	0	0	0	0	0	0	439760	0	1478800	1868100	0	0	0	0	0
897	0	0	0	0	0	0	0	0	0	0	0	0	0	0	0	0	0	0	0	0	0	0	0	0	0	0	0	0	0	0	0	0	0	0	0	0	0	0	0	0	0	449680	636580	831110	0	0	0	0	0
898	0	0	0	0	0	0	0	0	0	0	0	0	0	0	0	0	0	0	0	0	0	0	0	0	0	0	0	0	0	0	0	0	0	0	0	0	0	0	0	0	258700	472300	1042600	1226800	0	0	0	0	0
899	0	0	128780	0	221340	224940	120060	436810	508280	0	0	0	0	0	0	0	0	0	0	0	0	0	0	0	0	0	0	0	0	0	0	0	0	0	0	0	0	0	0	3833300	3680900	5235900	7878800	10986000	2397800	1628400	330610	0	0
900	653700	640590	1748300	619780	1014200	698610	825990	1095600	950700	1301200	1239200	1255300	1737800	0	0	0	0	0	0	0	0	0	0	0	0	0	0	1279800	1176500	0	0	0	1442900	0	0	0	3145600	5952800	125820000	149970000	267880000	446340000	436940000	968960000	307460000	22990000	24937000	40476000	167150000
901	10840000	36413000	32596000	24743000	13297000	5422000	1629600	1337200	1006400	490160	448480	378350	370410	277760	0	443300	0	566510	129410	577750	523610	582420	485640	466530	583710	1502100	632130	1973700	1366400	1307700	3448100	5386500	3993500	1500700	517220	1365400	2414600	2663400	7699700	18363000	22481000	29457000	43448000	61902000	30988000	2826700	3066500	2815200	3747400
902	500410	2428300	2695900	2336000	1485300	1212700	132240	975610	2044500	2752300	5086500	14870000	11537000	2667800	580080	1868800	0	2220400	1859200	1443500	871820	1954400	3670200	1216900	1369100	1258800	1908700	3657600	11455000	20959000	168980000	191450000	130680000	38810000	9954400	28953000	16673000	25307000	39581000	71904000	96621000	116560000	145550000	269170000	145310000	32878000	7546600	6839200	4237700
903	0	136170	220410	0	0	0	0	0	216510	0	0	550700	0	576310	0	721510	0	706990	0	0	1154200	0	520480	388240	0	2648100	2492300	5067000	7939700	8075500	2884100	8992700	20818000	30913000	3339400	22278000	805690	7108000	8864400	8013100	6879800	11724000	28780000	42532000	15634000	13938000	1384200	0	0
904	0	0	0	0	0	0	0	0	0	0	0	0	0	0	0	0	0	0	0	0	0	0	375190	0	663210	1008800	574450	773600	406150	731070	233140	281280	6091600	4796500	1546400	0	767980	1270000	609850	2157700	1538700	4002700	7855600	6339700	3025800	0	0	0	0
905	116010	208920	299800	325570	351230	368190	394580	514170	654220	0	709260	0	789420	663510	590690	0	582090	665700	401160	561750	542360	0	532710	754510	551090	700860	588850	717490	783140	749550	873360	1160800	901930	0	408580	0	697100	988850	1751800	2811400	0	3386900	2520000	3915000	1557600	1501200	2109000	2717600	1830900
906	0	0	0	0	0	0	0	54716	0	0	0	0	0	0	0	0	0	0	0	0	0	0	0	0	0	0	0	0	0	0	0	0	0	0	0	0	0	0	0	0	121580	0	2515400	3237400	387000	3720500	2082700	1667000	1295900
907	0	0	0	0	0	0	0	0	0	0	0	0	0	0	0	0	0	0	0	0	0	0	0	0	0	0	0	0	0	0	0	0	0	0	0	0	0	0	0	0	0	0	1708400	641220	0	1041500	0	0	0
908	0	0	0	0	0	0	0	0	0	106480	0	175270	152670	0	0	0	0	0	351630	388630	0	395940	0	0	0	0	0	680370	597230	467020	455710	0	0	0	0	0	699940	0	0	0	650190	852750	1085600	1140300	0	1020700	0	0	0
909	37812	209640	446600	334700	323390	343190	200330	543660	675190	514250	718610	663900	453500	352520	200750	238850	0	390650	0	0	0	0	0	0	0	0	0	732140	112940	128020	483340	0	496800	598100	0	421490	281240	0	222870	212780	0	1025800	2058500	1254200	0	0	0	0	0
910	0	0	0	0	0	0	0	0	0	0	0	0	0	0	0	0	0	0	0	0	0	0	0	0	0	0	0	0	0	0	0	0	0	0	0	0	0	0	0	0	251950	996920	1370000	648780	0	0	0	0	0
911	0	0	0	0	0	0	0	0	0	0	0	0	0	0	0	0	0	0	0	0	0	0	0	0	0	0	0	0	0	0	0	0	0	0	0	0	0	0	0	0	0	870880	1087500	252510	267620	0	0	0	0
912	0	0	0	0	0	0	0	0	0	0	0	0	0	0	0	0	0	0	0	0	0	0	0	0	0	0	0	0	0	0	0	0	0	0	0	930380	0	562720	1683300	627050	3498700	15724000	28725000	2956300	1120600	2604600	4129500	2747800	0
913	0	0	0	0	0	0	0	0	0	0	0	0	0	0	0	0	0	0	0	0	0	0	0	0	0	0	0	0	0	0	0	0	0	0	0	0	0	0	0	0	268860	578230	761110	0	0	0	0	0	0
914	0	0	0	0	0	0	0	0	0	0	0	0	0	0	0	0	0	0	0	0	0	0	0	0	0	0	0	0	0	0	0	0	0	0	0	0	0	0	0	0	0	194870	504680	0	0	0	0	0	0
915	0	0	0	0	0	0	0	0	0	0	0	0	0	0	0	0	0	0	0	0	0	0	0	0	0	0	0	0	0	0	0	0	352420	0	0	0	0	282900	851060	0	429870	3649500	11326000	0	0	0	0	0	0
916	0	0	0	0	0	0	0	0	0	0	0	0	0	0	0	0	0	0	0	0	0	0	0	0	0	0	0	0	0	0	0	0	0	0	0	0	0	0	0	0	0	9303700	47277000	0	0	0	0	0	0
917	0	0	0	0	0	0	0	0	0	0	0	0	0	0	0	0	0	0	0	0	0	0	0	0	0	0	0	0	0	0	0	0	0	0	0	0	0	0	0	6888700	3900500	28066000	106930000	19541000	11571000	7892600	0	0	0
918	0	0	0	0	0	0	0	0	0	0	0	0	0	0	0	0	0	0	0	0	0	0	0	0	0	0	0	0	0	0	0	0	0	0	0	0	0	0	0	0	0	0	212450	0	0	0	0	0	0
919	0	0	0	0	0	0	0	0	0	0	0	356120	0	0	0	0	0	627570	0	0	0	0	0	0	0	0	0	0	0	0	0	0	0	0	0	0	0	0	0	0	0	0	3301500	0	0	0	0	0	0
920	0	0	0	0	0	0	0	0	0	0	0	0	0	0	0	0	0	0	0	0	0	0	0	0	0	0	0	0	0	0	0	0	0	0	0	0	4999600	0	0	0	0	1946500	3359200	5405600	0	0	0	0	0
921	0	0	254310	0	201460	0	0	0	0	817410	1356800	0	1760200	3032300	0	762460	0	0	463430	0	0	773160	0	0	0	0	0	0	0	0	1883100	2172900	1682700	0	0	0	0	0	0	0	0	3652500	0	4201300	2996400	0	0	897890	2269800
922	0	708030	874880	606970	452750	384980	0	189050	0	0	0	0	0	0	0	0	0	0	0	0	0	0	0	0	0	0	0	0	0	0	0	0	0	0	0	0	0	1768700	2492700	0	1144600	2039700	0	0	0	0	0	1444400	3226800
923	0	0	0	0	0	0	0	0	0	0	0	0	0	0	0	0	0	0	0	0	0	0	0	0	0	0	0	0	0	0	0	257610	0	0	0	0	3392000	6393000	9525700	14574000	12184000	12977000	3633500	2690900	1800500	1920900	5714800	10477000	16132000
924	0	0	0	0	0	0	0	0	0	0	0	0	0	0	0	0	0	0	0	0	0	0	0	0	0	0	0	0	0	0	0	0	0	0	0	0	0	0	0	1292400	2465500	1295100	2083700	1275200	633600	0	417130	1362200	3461500
925	0	0	0	0	0	0	0	0	0	0	0	0	0	0	0	0	0	0	0	0	0	0	0	0	0	0	0	0	0	0	0	0	0	0	0	0	0	0	338640	222680	581510	0	0	613810	0	0	0	403840	655570
926	0	0	0	0	0	0	0	0	0	0	0	0	0	0	0	0	0	0	0	0	0	0	0	0	0	0	0	0	0	0	0	0	4248900	0	0	0	0	0	0	0	0	0	0	0	0	0	1386300	1537300	3679800
927	0	0	0	0	0	0	114240	0	161200	0	0	0	0	0	0	412880	0	402180	0	0	70318	1277400	0	0	1229800	0	0	0	0	0	0	0	82663	79752	0	0	0	0	0	55910	0	0	0	0	0	0	105030	176630	2595700
928	0	0	0	0	0	0	0	0	0	0	0	0	0	0	0	0	0	0	0	0	0	0	0	0	0	0	0	0	0	0	0	0	0	0	0	0	0	0	0	0	0	0	0	0	0	0	0	0	0
929	0	0	0	0	0	0	0	0	0	0	0	0	0	0	0	0	0	0	0	0	0	0	0	0	0	0	0	0	0	0	0	0	0	0	0	0	0	0	0	0	288930	0	0	0	0	0	0	409780	380740
930	0	0	0	0	0	0	0	0	0	0	0	0	0	0	0	0	0	0	0	0	0	0	0	0	0	0	0	0	0	0	0	0	0	0	0	0	0	0	0	0	0	0	0	0	0	0	0	1526300	532500
931	0	0	0	0	0	0	0	0	0	0	0	0	0	0	0	0	0	0	0	0	0	0	0	0	0	0	0	0	0	0	0	0	0	0	0	0	0	0	0	0	0	0	0	0	0	0	0	0	0
932	0	0	0	0	0	0	0	0	0	0	0	0	0	0	0	0	0	0	0	0	0	0	0	0	0	0	0	0	0	0	0	0	0	0	0	0	0	0	0	0	0	0	0	0	0	0	0	0	0
933	0	0	0	0	0	0	0	0	0	0	0	0	0	0	0	0	0	0	0	0	0	0	0	0	0	0	0	0	0	0	0	0	0	0	0	0	0	0	0	0	0	0	0	0	0	0	0	0	0
934	0	0	0	0	0	0	0	0	0	0	0	0	0	0	0	0	0	0	0	0	0	0	0	0	0	0	0	0	0	0	0	0	0	0	0	0	0	0	0	0	0	0	0	0	0	0	0	0	0
935	0	0	0	0	0	0	0	0	0	0	0	0	0	0	0	0	0	0	0	0	0	0	0	0	0	0	0	0	0	0	0	0	0	0	0	0	0	0	0	0	0	0	0	0	1230800	0	0	286930	0
936	0	0	0	0	0	0	0	0	0	0	0	0	0	0	0	0	0	0	0	0	0	0	0	0	0	0	0	0	0	0	0	0	0	0	0	0	0	0	0	0	0	0	0	0	0	0	0	0	3856700
937	0	0	0	0	0	0	0	0	0	0	0	0	0	0	0	0	0	0	0	0	0	0	0	0	0	0	0	0	0	0	0	0	0	0	0	0	0	0	0	905020	389030	1394000	617810	756010	930280	1070300	643380	2538100	211550000
938	0	0	0	0	0	0	0	0	0	0	0	0	0	0	0	0	0	0	0	0	0	0	0	0	0	0	0	0	0	0	0	0	0	0	0	0	0	0	0	0	0	0	0	0	0	0	1303400	5258000	16220000
939	0	0	0	0	0	0	0	0	0	0	0	0	0	0	0	0	0	0	0	0	0	0	0	0	0	0	0	0	0	0	0	0	0	0	0	0	0	0	0	0	0	0	273630	390340	629490	481450	2286400	11484000	23944000
940	0	0	0	0	0	0	0	0	0	0	0	0	0	0	0	0	0	0	0	0	0	0	0	0	0	0	0	0	0	0	0	0	0	0	0	0	0	0	0	0	0	0	0	0	0	0	0	0	964670
941	0	0	0	0	0	0	0	0	0	0	0	0	0	0	0	0	0	0	0	0	0	0	0	0	0	0	0	0	0	0	0	0	0	0	0	0	0	378270	0	0	0	0	0	0	0	0	673950	5639900	4273500
942	0	0	0	0	0	0	0	0	0	0	0	0	0	0	0	0	0	0	0	0	0	0	0	0	0	0	0	0	0	0	0	0	0	0	0	0	0	0	0	0	0	0	0	0	0	0	0	0	0
943	0	0	0	0	0	0	0	0	0	0	0	0	0	0	0	0	0	0	0	0	0	0	0	0	0	0	0	0	0	0	0	0	0	0	0	0	0	0	0	0	0	0	0	0	0	0	0	0	0
944	0	0	0	0	0	0	0	0	0	0	0	0	0	0	0	0	0	0	0	0	0	0	0	0	0	0	0	0	0	0	0	0	0	0	0	0	0	0	0	0	0	0	0	0	0	0	0	0	0
945	0	0	0	0	0	0	0	0	199750	180750	0	0	0	0	0	0	0	0	0	0	0	0	0	0	0	0	0	0	0	0	0	0	0	0	0	0	0	0	0	0	0	154280	0	0	0	0	0	0	0
946	0	0	0	0	0	0	0	0	0	0	0	0	0	0	0	0	0	0	0	0	0	0	0	0	0	0	0	0	0	0	0	0	0	0	0	0	0	0	0	0	0	507510	633470	0	0	0	0	360050	697630
947	918660	3240500	5779300	5862600	5187500	5988700	11750000	14615000	14506000	16152000	25996000	27780000	25445000	28142000	22519000	47497000	26433000	31799000	23157000	42855000	32682000	34009000	37545000	55113000	35141000	27158000	28012000	54848000	40200000	39358000	55536000	36291000	48503000	46710000	22621000	43670000	60641000	42667000	55333000	40985000	29782000	44629000	38181000	46708000	30701000	32985000	32952000	57358000	179930000
948	0	0	0	0	0	0	0	0	0	0	0	0	0	0	0	0	0	0	0	0	0	0	0	0	0	0	0	0	0	0	0	0	0	0	0	0	0	0	0	0	538230	0	0	0	0	0	0	0	1548100
949	0	0	0	0	0	76911	0	182690	0	175680	0	0	0	0	0	0	0	0	0	0	0	0	0	0	0	0	0	0	0	0	0	0	0	0	0	0	0	916070	281350	0	0	0	0	0	0	0	0	1886800	8670800
950	0	0	0	0	0	0	0	0	0	0	0	0	0	0	0	0	0	0	0	0	0	0	0	0	0	0	0	0	0	0	0	0	0	0	0	0	0	0	0	0	0	0	0	0	0	0	0	0	31162000
951	0	0	0	0	0	0	0	0	0	0	0	0	0	0	0	0	0	0	0	0	0	0	0	0	0	0	0	0	0	0	0	0	0	0	0	0	0	0	0	0	0	0	0	0	0	0	0	0	4295900
952	0	0	0	0	0	0	0	0	0	0	0	0	0	0	0	0	0	0	0	0	0	0	0	0	0	0	0	0	0	0	0	0	0	0	0	0	0	0	0	0	0	0	0	0	0	0	0	0	886580
953	0	0	0	0	0	0	0	0	0	0	0	0	0	0	0	0	0	0	0	0	0	0	0	0	0	0	0	0	0	0	0	0	0	0	0	0	0	0	0	0	0	0	0	0	0	0	0	0	363530
954	0	0	0	0	0	0	0	0	0	0	0	0	0	0	0	0	0	0	0	0	0	0	0	0	0	0	0	0	0	0	0	0	0	0	0	0	0	0	0	0	0	0	0	0	0	0	0	1389700	1582200
955	0	0	0	0	0	0	0	0	0	0	0	0	0	0	0	0	0	0	0	0	0	0	0	0	0	0	0	0	0	0	0	0	0	0	0	0	0	0	0	0	0	0	0	0	0	0	2305900	4671500	3435700
956	0	0	125180	0	0	0	0	218880	0	0	274730	0	348780	344050	0	437740	0	465790	0	438000	0	0	397920	0	0	0	0	226840	692320	366460	359410	590710	0	561710	0	895190	400970	0	0	404080	0	596880	0	0	0	1008200	4185500	4869300	5363000
957	0	364170	401910	565420	689250	454580	733250	1062600	1196200	949190	1595600	1468100	865010	0	0	0	0	0	0	0	0	0	0	0	2370900	0	0	0	0	0	0	0	0	0	0	0	0	1926600	3117500	3471800	0	0	0	0	9875200	9630100	10136000	16003000	20571000
958	0	0	0	0	0	0	0	0	0	0	0	0	0	0	0	0	0	0	0	0	0	0	0	0	0	0	0	0	0	0	0	0	0	0	0	0	0	0	0	0	0	0	0	0	535000	0	414480	720170	901560
959	0	0	0	0	0	0	0	0	0	0	0	357490	0	0	0	0	0	317960	0	0	0	0	332070	0	0	0	0	0	0	0	0	0	0	0	0	957180	373450	0	0	0	922220	717110	0	0	3739100	0	5361800	10625000	14395000
960	0	0	0	0	126860	69132	160360	217820	276040	140260	161010	0	412320	448730	182410	225820	0	643940	148020	548290	0	379010	895370	468750	315880	0	0	135290	127600	184680	129880	148740	239930	201520	0	0	0	651620	195260	410610	202320	981870	285690	2099800	671980	481280	2979700	4597700	5927700
961	689870	2148900	1940700	3503300	1832600	2941200	2063200	2494800	446460	1091800	1823800	2061800	753870	1053700	1045600	0	0	0	766330	0	0	0	1348000	0	1203000	1227600	0	3930700	648910	1552600	7370300	3510000	10968000	5892200	6778400	20149000	40166000	35543000	64193000	41737000	5202700	9282800	10126000	25276000	54417000	47366000	94409000	250190000	489330000
962	253430	676880	613840	865300	555280	695010	2040500	2438800	985550	844610	1020400	1407700	954870	0	0	1065800	0	1017000	0	1068500	0	854370	0	0	1543400	1038200	0	541730	445510	0	0	0	761830	0	0	0	1196800	2049100	3516900	8377500	2854200	2600600	2492300	3087200	3349600	4503800	9489000	24309000	45443000
963	0	0	0	0	0	87020	0	0	0	0	404790	0	0	0	0	225030	0	0	0	441330	0	0	0	0	0	0	0	0	115800	0	0	0	0	0	0	0	0	0	0	0	0	562420	0	0	1051300	0	2151900	1044100	3322200
964	0	144660	163450	236030	389080	278480	920260	975180	622690	236200	1057600	480980	549610	565440	511720	1062200	0	1324500	990190	645830	0	658520	471530	379440	0	0	0	0	959860	944680	2172600	707910	539170	0	290060	421120	0	0	759090	0	416410	465690	0	0	0	0	761870	2028800	5636100
965	0	0	0	0	0	0	0	0	0	0	0	0	0	0	0	0	0	0	0	0	0	0	0	0	0	0	158910	0	232430	267930	0	581500	0	0	0	0	0	0	0	0	0	0	0	0	0	0	0	721480	1113900
966	0	0	0	0	0	0	0	0	0	0	0	0	0	0	0	0	0	0	0	0	0	0	0	0	0	0	0	0	0	0	0	0	0	0	0	0	0	0	0	0	0	0	0	0	0	0	0	764740	0
967	0	0	0	0	0	0	0	0	0	0	0	0	0	0	0	0	0	0	0	0	0	0	0	0	0	0	0	0	0	0	0	0	0	0	0	0	0	0	0	0	0	0	0	0	0	0	0	1172700	502630
968	0	0	0	54676	0	0	0	0	0	0	0	0	0	0	0	0	0	0	0	0	0	0	0	0	0	0	0	0	0	0	135610	0	0	0	0	0	0	0	0	0	0	0	0	0	0	0	0	969060	876850
969	0	0	0	0	0	0	0	0	0	0	0	0	0	0	0	0	0	0	0	0	0	0	0	0	0	0	0	0	0	0	0	0	0	0	0	0	0	0	0	0	0	0	0	0	0	0	0	1339700	1611100
970	0	0	0	0	0	0	0	0	0	0	0	0	0	0	0	0	0	0	0	0	0	0	0	0	0	0	0	0	0	0	0	0	0	0	0	0	0	0	0	0	0	0	0	0	0	0	0	1189200	1490800
971	0	0	0	1049600	0	1025400	0	2310800	2774600	2330600	3144800	3567700	3319000	3651300	2018500	4220700	2987900	3636400	3485000	4062300	3796400	4075300	3261600	0	3859200	3614000	3071200	4257100	3337700	3648800	4773000	3826000	2796500	4227800	0	3206900	0	0	0	4161900	2068700	5110400	4876500	6243600	7323400	8705900	8915500	14137000	17583000
972	0	0	0	0	85549	0	0	0	0	0	0	0	0	0	0	0	0	0	0	0	0	0	0	0	0	0	0	0	0	0	0	0	0	0	0	0	0	0	0	0	0	0	0	0	0	0	2846100	3891100	5460500
973	0	0	0	0	0	0	0	0	0	0	0	0	0	0	0	0	0	0	370590	0	0	0	466880	0	0	0	0	812200	786800	1565700	1430500	0	0	0	0	0	0	224680	0	398580	156950	0	0	294500	923240	3402300	6737400	14088000	14277000
974	1035400	3122400	5708600	6874000	6992400	8039500	9329600	22986000	20511000	21097000	16825000	18841000	20845000	16536000	19246000	22087000	14585000	18269000	14515000	19319000	12712000	25655000	16180000	10096000	18677000	12691000	9591500	18182000	15157000	21736000	35409000	17812000	11775000	14372000	7687400	19034000	27443000	22618000	16043000	23946000	15692000	16259000	27937000	26146000	31001000	33028000	50071000	130650000	140870000
975	0	152750	124590	166890	0	0	305210	393440	0	414400	0	505710	385700	449320	469960	0	0	457780	0	516920	502470	0	531080	454160	550210	0	0	345530	374700	0	351300	0	0	0	0	0	383330	464780	382660	0	441780	0	1463100	730790	1138400	2147300	7114600	8956100	11196000
976	0	0	0	0	0	0	117020	0	0	0	0	0	0	0	0	0	0	0	0	0	0	0	0	0	0	0	0	0	0	0	0	0	0	0	0	0	653870	930820	730460	1663400	536870	2155900	1232800	976290	3003100	1320200	5481000	8153300	9097800
977	0	288880	116280	127840	418300	0	292420	276930	239660	719560	472340	614160	513310	688190	0	726000	0	261040	0	0	0	435910	671320	0	0	0	0	1231000	552400	0	1649600	828910	1064600	616440	0	3463800	2797300	3689500	4016600	17442000	20314000	30430000	45663000	61731000	82414000	80675000	111310000	149840000	170440000
978	0	0	0	0	0	0	0	0	0	0	0	0	0	0	0	298550	0	0	0	0	0	0	523540	150690	0	0	0	0	0	0	0	0	0	98043	0	790520	1539100	1015200	1588100	1870700	3169100	3065700	3124100	5739600	9335400	12757000	24473000	31673000	35827000
979	1789800	3532900	4554100	5168600	5021000	5314900	7709600	10058000	11134000	9752800	13061000	12713000	11788000	8685900	4320600	12418000	6604100	14131000	10418000	13202000	8207900	9665900	12265000	8491900	6681700	13766000	11916000	18051000	17734000	12154000	15149000	11763000	17852000	16756000	10867000	31442000	22711000	18445000	21388000	22884000	25611000	33627000	37234000	50011000	82334000	109370000	183720000	371980000	389720000
980	30886000	82139000	114260000	145940000	105770000	68972000	39998000	22723000	9321300	4001600	3808400	2662600	5365900	6076500	1147200	3465900	1611400	490860	598380	1105700	2287400	1952200	1144400	882560	2810300	1760900	2963600	8686100	1840900	5277600	19372000	21351000	35244000	24230000	25802000	36237000	53535000	67399000	58888000	173170000	192930000	246070000	348910000	517510000	848900000	1138100000	1545400000	2170700000	2616500000
981	4006300	14451000	20917000	23721000	17879000	12289000	11053000	6727100	2664300	1894700	1048800	683380	837030	1143900	0	318300	0	0	218380	0	0	0	191410	0	0	0	581110	1128900	608700	1004500	1466500	1170200	1830200	1741600	1607200	3770300	6375800	6538700	7250000	8932000	9267700	12166000	14130000	16302000	26414000	22774000	49169000	120380000	188660000
982	0	0	0	0	0	0	0	0	0	0	0	0	0	0	0	0	0	0	0	0	0	0	0	0	0	0	0	0	0	0	0	0	0	0	0	0	0	0	0	0	0	0	0	0	0	1619500	343020	5658600	8118400
983	0	99699	683220	223090	645520	866480	941300	1982000	995730	913880	783380	595830	1453400	608330	146180	658880	0	1043500	445800	1916500	1589200	1458200	2689700	364480	409140	0	0	269440	224250	307070	259650	0	254370	0	0	336090	423210	307540	292560	705100	297530	215600	745910	1821000	2896100	1585100	6831500	10654000	14413000
984	0	0	0	0	0	0	0	0	0	0	0	0	0	0	0	0	0	0	0	0	0	0	0	0	0	0	0	0	0	0	0	0	0	0	0	0	0	0	0	0	228070	0	0	0	573470	665470	6033500	10280000	14638000
985	0	0	0	0	0	0	0	0	0	0	0	0	0	0	0	0	0	0	0	0	0	0	0	0	0	0	0	0	0	0	0	0	0	0	0	0	145520	0	0	0	0	0	0	575350	970710	2546400	6359300	19200000	31579000
986	11683000	33793000	39185000	45240000	32042000	18750000	14885000	16113000	19951000	19652000	30989000	47143000	52340000	39939000	19476000	19899000	18589000	19270000	11419000	20017000	13703000	17967000	22323000	22816000	18838000	21794000	22616000	30459000	45488000	39580000	84319000	59402000	86063000	102290000	98305000	165100000	197000000	170420000	153650000	172560000	131320000	180910000	167720000	221340000	265560000	290200000	408950000	635830000	1206200000
987	372250	2014800	3522300	3054000	3190500	3362800	4859200	7134000	9957400	9082300	11109000	11009000	14609000	10473000	8112300	12843000	10123000	14986000	13179000	16795000	14725000	22649000	20366000	18703000	18537000	17570000	16385000	23134000	29628000	45579000	47696000	13493000	14593000	10224000	14491000	33126000	43683000	49689000	28939000	38920000	33190000	44691000	33149000	59383000	65325000	73326000	86307000	242880000	374550000
988	180800	819830	695540	719370	750310	696780	481370	689110	468460	1378700	1039300	1033500	1779600	1251100	0	1212600	749420	1218500	580300	2836200	975690	1827900	1825500	1920200	3571700	2880100	3054700	7389800	9035800	8123800	11729000	6485000	3193600	6915100	7184700	10906000	10963000	13314000	12998000	22372000	15119000	24694000	27128000	35611000	35407000	18151000	66885000	123850000	155730000
989	7548400	18434000	19013000	21356000	16725000	15960000	17160000	24967000	33375000	26973000	42437000	50306000	45991000	26895000	33531000	38259000	24233000	31705000	20923000	32910000	28562000	29111000	30957000	35345000	36634000	42035000	54452000	49528000	76668000	55632000	117920000	90660000	105320000	115090000	65249000	152680000	188020000	175450000	212700000	255950000	312750000	489310000	434170000	779390000	896400000	1302100000	2286800000	3979400000	4497200000
990	2219800	6688800	8599100	8079900	8803900	6423700	6400200	5861300	9024200	8871300	11589000	9362500	14980000	9536100	6470700	13639000	9678000	7719700	11010000	17018000	10513000	14565000	16310000	8813900	10801000	15488000	12722000	23156000	16350000	15439000	21872000	19637000	20003000	26672000	15109000	23688000	28167000	39994000	33580000	60094000	47833000	114290000	140800000	252490000	337160000	395110000	530940000	905290000	960260000
991	64577	856670	1365100	284090	1230800	455950	446330	507600	1040900	857230	3701800	3556800	852460	1093300	274670	1053300	1795300	5135000	1437400	5125400	1365900	5268100	5762100	5063700	8006500	3780100	5792800	7851000	6577200	10876000	24125000	35327000	59761000	31342000	29401000	31851000	23537000	13603000	3215500	24838000	16381000	31448000	13229000	16298000	20379000	22326000	44217000	96790000	143890000
992	0	0	0	0	0	0	0	0	0	0	0	0	0	0	0	0	0	0	0	0	0	0	0	0	0	0	0	0	0	0	0	0	0	0	0	0	0	0	0	0	0	0	0	0	0	0	0	1088200	1388600
993	0	119730	356440	460900	157410	515520	607750	487010	856450	423120	1825400	981820	1862300	515560	409050	1105200	0	532070	482460	475100	589620	730690	3237800	0	0	799340	2453500	3331600	3491400	3531000	3969700	797310	2208200	514710	0	1852600	2728700	4075900	3158400	4848700	3859200	5047100	3565600	5311600	2303400	1776500	2685500	25310000	18767000
994	0	0	0	0	0	0	0	0	0	0	0	0	0	0	0	0	0	0	0	0	0	0	0	0	0	0	0	0	0	0	0	0	0	0	0	0	0	0	0	242780	0	0	0	0	0	0	340010	560730	773700
995	0	0	0	0	0	0	0	0	0	0	0	0	0	0	0	0	0	0	0	0	0	0	0	0	0	0	0	0	0	0	0	0	0	0	0	0	0	0	0	285760	0	0	0	0	0	0	1777400	3799000	3777100
996	0	0	0	0	0	0	0	0	0	0	0	0	0	0	0	0	0	0	0	0	0	0	276630	0	0	0	0	744990	265980	0	0	0	0	0	0	0	654010	706380	596270	1862100	1031200	1017300	2274200	3604500	1348600	1508200	11630000	16290000	12485000
997	0	0	0	71949	0	48600	93565	123190	181330	125330	0	182190	0	287700	0	108080	0	444830	0	428480	0	1463100	372480	0	0	651300	416740	140790	167550	561230	428660	184630	595860	663150	0	358660	1884000	1104800	1005000	1068100	1042100	633450	1743200	1525000	3515500	1372700	11531000	10461000	9865000
998	0	0	0	0	0	0	0	0	0	0	0	0	0	0	0	0	0	0	0	0	0	0	0	0	0	0	0	0	0	0	0	0	0	0	0	0	0	0	0	0	0	0	0	0	1910800	0	3206700	4648700	4394200
999	0	67214	0	0	46752	43513	0	82304	0	98635	0	0	0	0	0	164680	0	196140	0	0	0	0	153330	0	0	0	0	0	0	0	303950	0	415060	400980	0	0	0	0	0	0	0	0	0	0	0	0	620390	946060	502580
1000	564960	3049000	3987400	4665100	4184000	3267500	5199100	8412300	10274000	7705200	11335000	8968200	9088500	8831300	5288900	9672300	6763200	8883600	10395000	13483000	5224500	10599000	13595000	10214000	12784000	7169800	5955500	19263000	17195000	12476000	22801000	14080000	7206100	8028900	1871100	8759400	7077800	5060300	4825400	4880400	5098200	5810700	4459700	9908300	7678100	8884100	20779000	30547000	50003000
1001	119380	608160	1066900	174300	1150900	866190	2040300	3244000	2419300	2472600	5868300	5645800	3642200	5358200	3538800	9971800	5020000	12648000	6972100	12194000	9088100	8037600	7695800	8805300	10442000	13781000	13727000	17213000	15474000	15075000	26106000	20097000	11872000	10805000	7809500	25227000	15909000	5621000	11832000	10961000	12004000	9219700	9857500	24191000	19727000	14061000	44985000	49471000	74640000
1002	23657	0	34589	0	17262	0	0	0	0	0	0	0	0	0	0	0	0	0	0	0	0	0	0	0	0	0	0	0	0	0	0	0	0	0	0	0	0	0	0	0	0	0	0	0	583080	650930	0	910700	841450
1003	0	0	0	0	0	0	0	0	0	0	0	0	0	0	0	0	0	0	0	0	0	0	0	0	0	0	0	0	0	0	0	0	0	0	0	0	0	0	0	0	249260	0	0	0	0	102020	1387400	4372900	5388500
1004	0	0	0	0	0	0	0	0	0	0	0	0	0	0	0	0	0	0	0	0	0	0	0	0	0	0	0	0	0	0	0	0	0	0	0	0	0	0	0	0	0	0	524530	1244300	3917800	3229000	3133100	5924400	13178000
1005	9870700	31421000	37290000	54378000	40268000	20523000	15994000	5775800	3455400	1956200	2260300	2772200	4660500	10681000	3067900	2676300	3272100	1787200	1611400	2654700	2181500	5397400	7841700	6532700	1906000	3246100	7094200	9159900	10722000	5292500	28150000	16547000	38417000	61108000	27026000	40789000	62989000	60976000	70791000	70342000	58003000	58589000	58452000	87161000	212520000	223730000	151600000	372960000	446990000
1006	8196100	31104000	41876000	46566000	33206000	21170000	16650000	10804000	5239600	3138500	3809900	7388800	5951900	6132800	3040200	2857300	3075100	0	0	3225400	3354400	4014100	3230900	4210400	5693000	0	5664600	10048000	10021000	11126000	19312000	28584000	45165000	39114000	19922000	30053000	56466000	57401000	69637000	72519000	49529000	85253000	60780000	119430000	152660000	153340000	231670000	357230000	392950000
1007	0	0	0	0	85604	68624	186220	198370	172370	170530	211470	264880	361190	311230	0	0	0	0	323920	328690	0	1020700	617250	344550	0	373090	299570	1071400	332480	330040	377520	402360	378190	824890	474230	2124400	2597900	2564000	3268900	4626000	9455700	17768000	20363000	44851000	41211000	40459000	55635000	114150000	125630000
1008	0	0	0	0	0	0	0	0	0	0	0	0	0	0	0	0	0	0	0	0	0	0	0	0	0	0	0	0	0	0	0	0	0	0	0	0	0	0	602660	262480	425360	948590	1211500	1780600	1197800	1140500	3613700	4382100	4020000
1009	0	0	0	94932	0	55544	126090	0	164090	124210	0	0	237800	0	0	0	0	0	0	0	0	679780	366880	0	0	0	0	0	446310	534500	626610	0	699660	642510	0	0	1613000	1568500	1686700	1769800	2056000	5957600	8690600	16877000	26802000	19129000	55817000	53215000	54588000
1010	0	0	0	0	0	0	0	0	0	0	0	0	0	0	0	0	0	0	0	0	0	0	0	0	0	0	0	0	0	0	0	0	0	0	0	0	0	0	0	574920	1910800	4013300	9232900	12211000	24672000	30676000	68591000	84271000	73726000
1011	0	0	0	0	0	0	0	0	0	0	0	0	0	0	0	0	0	0	0	0	0	0	0	0	0	0	0	0	0	0	0	0	0	0	0	0	0	0	0	0	0	0	0	929430	1264100	779260	3049500	4104100	3931200
1012	96050	659450	865220	689400	1168500	659370	1199500	1225800	1614900	2533000	1344000	1903000	815610	543740	0	898920	0	2186000	1422500	2411400	786540	1947300	2022000	951750	0	4536600	3513700	3557200	4160100	3450100	7654700	4896100	4725700	2101800	2735300	3155100	4773400	0	5789000	5269100	3407900	4254300	7117900	12939000	22952000	48909000	113300000	176480000	181720000
1013	0	0	0	0	0	0	0	787700	198080	0	0	231020	224000	0	0	0	0	356970	0	400670	3896800	2300100	0	1035000	0	0	608800	2363800	2666800	443330	2756500	3005200	0	0	0	5666900	11351000	12499000	8730300	9631500	13450000	20462000	33202000	43390000	107190000	141170000	267140000	421180000	425530000
1014	0	0	0	0	0	0	112200	0	0	0	0	0	0	0	0	0	0	365470	270880	500580	0	202620	950070	0	0	736990	476420	1625100	1297000	661640	2065600	1113900	0	689480	799920	1112100	1326500	1198400	1554000	1886100	2080800	1746600	2620700	3779800	9214500	7728500	12211000	29352000	35538000
1015	0	0	0	0	0	0	0	0	0	0	0	0	0	0	0	0	0	0	233050	0	0	0	0	0	0	0	0	0	0	0	0	0	0	0	0	0	0	0	0	489080	496500	914720	4570600	6115800	8249600	10779000	12622000	13540000	15681000
1016	22662	161530	537330	621830	353910	408010	432000	1254100	1066300	769510	1119900	1029600	542170	403240	0	0	0	0	0	358620	0	332290	0	0	0	0	0	290760	0	0	328440	0	0	0	0	0	657960	850580	444750	2088900	3112700	1017700	6436400	9462500	19941000	11455000	15921000	18036000	19433000
1017	103020	550520	668240	984760	801870	963830	2235100	3000900	2661200	2183300	3648800	3378800	2411200	1875800	1124000	2900300	1914100	3687400	2535300	3319900	2937800	2071200	4320000	1695200	2089300	2107400	1752400	1357400	934080	1794500	4603600	3228200	3245600	810780	3936100	5613000	8299100	2562700	3704800	4642500	6599100	10981000	11229000	17211000	11906000	8446400	16266000	21385000	30396000
1018	32085	0	200320	97321	91355	243160	131530	316920	258560	184800	938840	288140	930910	1550600	628060	1162000	0	1876600	552020	1353100	506520	2252100	1946800	0	767700	788760	2287000	2716500	2942500	1989700	3596900	3742600	6111900	9479800	5035400	14328000	15498000	10641000	7581100	31194000	36193000	66688000	122140000	298950000	101670000	138300000	165360000	295890000	315920000
1019	573780	1054000	799500	850680	615550	862340	512760	804890	1457200	951270	649840	782670	286270	275810	0	0	0	0	0	0	0	0	403210	0	0	0	0	0	0	0	0	0	271600	0	0	0	0	0	356440	0	294570	0	769680	1810500	2151400	1728000	3246900	5500500	3458600
1020	273120	608250	829090	413870	424990	222120	348450	360860	699090	374310	602390	985770	2648700	2457600	586790	637670	0	0	287840	0	0	0	585640	0	1457600	0	1809000	4851700	3912100	2542500	3874500	4901500	4174600	1725700	3856300	5417200	7548800	5188100	12133000	21875000	24501000	38708000	39386000	65851000	92648000	67824000	85683000	106530000	80531000
1021	0	0	93393	270050	165490	0	191850	0	254840	237780	349380	0	443780	0	0	0	0	0	0	0	0	455350	0	0	0	0	0	0	0	380950	1953500	2830700	1201400	2039900	670190	4697100	1702600	1396100	2007000	4314600	3806200	5713700	6915200	17960000	18748000	18858000	20725000	24219000	15962000
1022	0	0	0	0	0	0	0	0	0	0	0	0	0	0	0	0	0	0	0	0	0	0	0	0	0	0	0	0	875880	0	0	0	0	0	0	0	612820	818160	895510	2651500	12168000	20738000	48558000	62323000	58734000	50516000	59478000	80592000	77600000
1023	94527	118540	185570	200050	214310	198080	257130	349540	1054000	450480	1136100	551260	498130	0	0	85949	0	482470	0	0	0	0	0	0	0	0	0	776320	0	157000	0	433160	615200	273970	0	0	3070200	3810500	3378400	5163900	9431500	17165000	41255000	65220000	108250000	87954000	58409000	76377000	85672000
1024	0	0	0	0	0	0	0	0	0	0	0	0	0	0	0	0	0	0	0	0	0	0	0	0	0	0	0	0	0	0	0	0	0	0	0	0	359860	656760	921670	3946200	15435000	52966000	90261000	300590000	353550000	326820000	253820000	229050000	284150000
1025	338530	551810	1124300	1024700	1097900	235300	1765000	1680700	2821700	2928200	3811400	5534900	4974600	4580700	1170400	6097000	4193600	5502100	4843900	6178300	2423300	4414900	4517700	5985000	5236500	2688400	3276400	5729500	5758900	4743100	5415600	10479000	6242600	7233400	6237000	7176400	993160	1629900	1075800	3603700	4193800	14512000	13370000	6659200	24252000	44672000	44760000	19348000	30669000
1026	3823000	12235000	24817000	22930000	15667000	7457600	8979200	9308100	7206000	8565900	3910100	3072900	20578000	43857000	44622000	5765400	9002700	6481200	0	8183300	0	1788500	9073900	1691300	0	17424000	13960000	15832000	7562600	8094900	33278000	28026000	38381000	37646000	0	44798000	40135000	34551000	40299000	29521000	26840000	3338200	31529000	35445000	35449000	23736000	27406000	43075000	11841000
1027	0	0	0	0	0	0	771030	1089600	1438400	1651100	0	0	2330000	3881600	0	3473800	0	3709500	2119200	2611100	0	0	1934700	0	0	0	3452400	0	1661200	0	0	1475800	2242600	0	0	0	0	0	1820300	0	0	3331700	0	4369800	0	0	0	0	5527600
1028	0	960040	0	1555200	1368800	906930	0	575610	0	811300	0	0	0	0	792320	0	0	0	0	0	0	0	433110	0	0	0	0	0	0	0	1294000	2141100	0	2386800	2354200	12545000	3774400	9009700	3393600	0	0	0	0	0	0	0	2119500	0	5498700
1029	0	0	0	0	0	0	0	0	0	0	0	0	0	0	0	0	0	595140	272390	0	0	0	0	0	791630	4000900	5474700	2072000	4191900	1525900	4237500	7135400	10478000	21361000	27258000	36269000	4039900	2727800	513570	2230600	939650	3872900	1559700	5249800	2734500	2228500	2071300	3436500	17139000
1030	2047400	4601100	6341300	5316300	4287400	3904200	5218500	5747600	5154400	9086600	10950000	12860000	10384000	7025800	1732200	1721900	1367900	6846600	8234300	11563000	6822200	16598000	28119000	19891000	53319000	67211000	167880000	2313700000	99294000	23765000	35009000	40832000	44091000	40553000	106000000	1771900000	869460000	88166000	173930000	260850000	91017000	140740000	229440000	391970000	368790000	343440000	317460000	511780000	810810000
1031	0	0	0	0	0	0	0	0	0	0	0	0	0	0	0	0	0	0	0	0	0	0	0	0	0	0	0	0	0	0	0	0	0	0	0	0	0	0	0	0	0	0	0	0	0	0	0	0	0
1032	0	0	0	0	0	0	0	0	0	0	0	0	0	0	0	0	0	0	0	0	0	0	0	0	0	0	0	0	0	0	0	0	0	0	0	0	0	0	0	0	0	0	0	0	0	0	0	0	0
1033	0	0	0	0	0	0	0	0	0	0	0	0	0	0	0	0	0	0	0	0	0	0	0	0	0	0	0	0	0	0	0	0	0	0	0	0	0	0	0	0	0	0	0	0	0	0	0	0	0
1034	0	0	0	0	0	0	0	0	0	0	0	0	0	0	0	0	0	0	0	0	0	0	0	0	0	0	0	0	0	0	0	0	0	0	0	0	0	0	0	0	0	0	0	0	0	0	0	0	0
1035	0	0	0	0	0	0	0	0	0	0	0	0	0	0	0	0	0	0	0	0	0	0	0	0	0	0	0	0	0	0	0	444050	0	0	0	0	0	0	0	0	0	0	0	0	0	0	0	0	0
1036	0	0	0	0	0	0	0	0	0	0	0	0	0	0	0	0	0	0	0	0	0	0	0	0	0	0	0	0	0	0	0	0	0	0	0	0	0	0	0	0	0	0	0	0	0	0	978450	1339800	0
1037	0	6867500	7107200	0	7438000	7687100	0	0	0	0	8867700	0	0	0	0	0	0	0	0	0	0	0	0	0	0	0	0	0	0	0	0	0	0	0	0	34622000	17855000	0	0	0	0	0	0	0	0	0	0	0	0
1038	0	0	0	0	0	0	0	0	0	0	0	0	0	0	0	0	0	0	0	0	0	0	0	0	0	0	0	0	0	0	0	0	0	0	0	0	0	0	0	0	0	0	0	0	0	0	0	0	0
1039	0	0	0	0	0	0	0	0	0	0	0	0	0	0	0	0	0	0	0	0	0	0	0	0	0	0	0	0	0	0	0	0	0	0	0	0	0	0	0	0	0	0	0	0	0	0	0	0	0
1040	0	0	0	0	0	0	0	0	0	0	0	0	0	0	0	0	0	0	0	0	0	0	0	0	0	0	0	0	0	0	0	0	0	0	0	0	0	0	0	0	0	0	0	0	0	0	0	1074100	0
1041	0	0	0	0	0	0	0	0	0	0	0	0	0	0	0	0	0	0	0	0	0	0	0	0	0	0	0	0	0	0	0	0	0	0	0	0	0	0	0	0	0	0	0	0	0	0	0	0	687390
1042	0	0	0	0	0	0	0	0	0	0	0	0	0	0	0	0	0	0	0	0	0	0	0	0	0	0	0	0	0	0	0	0	0	0	0	0	0	0	0	0	0	0	0	0	0	0	0	0	0
1043	0	0	0	0	0	391280	438580	467490	0	727220	469080	0	0	0	0	0	0	0	0	0	0	0	0	0	0	0	0	0	0	0	0	0	0	0	0	0	0	0	0	0	0	0	0	0	0	0	0	0	0
1044	0	0	0	0	0	0	0	0	0	0	0	0	0	0	0	0	0	0	0	0	0	0	0	0	0	0	0	0	0	0	0	0	0	0	0	0	0	0	0	0	0	0	0	0	0	0	0	0	0
1045	0	0	0	0	0	0	0	0	0	0	0	0	0	0	0	0	0	0	0	0	0	0	0	0	0	0	0	0	0	0	0	0	0	0	0	0	0	0	0	0	0	0	0	0	0	0	0	0	1082200
1046	0	0	0	0	0	0	0	0	0	0	0	0	0	0	0	0	0	0	0	0	0	0	0	0	0	0	0	0	0	0	0	0	0	0	0	0	0	0	0	0	0	0	0	0	0	0	0	0	0
1047	0	0	0	0	0	0	0	0	0	0	0	0	0	0	0	0	0	0	0	0	0	0	0	0	0	0	0	0	0	0	0	0	0	0	0	0	0	0	0	0	0	0	0	0	0	0	0	0	0
1048	0	0	0	0	0	0	0	0	0	0	0	0	0	0	0	0	0	0	0	0	0	0	0	0	0	0	0	0	0	0	0	0	0	0	0	0	0	0	0	0	0	0	0	0	0	0	0	1075100	0
1049	0	0	0	0	0	0	0	0	0	0	0	0	0	0	0	0	0	0	0	0	0	0	0	0	0	0	0	0	0	0	0	0	0	0	0	0	0	0	0	0	0	0	0	0	0	0	0	0	0
1050	0	0	132390	0	0	0	183300	0	276480	292420	0	0	0	0	0	0	0	0	0	0	0	0	0	0	0	0	0	0	0	0	0	0	0	0	0	0	0	0	0	0	0	0	0	0	0	0	0	1944500	6897700
1051	104800	211490	614970	733750	687680	1270500	1802500	3108700	3801700	7020200	9691600	4949000	3112300	3260100	1882600	1807500	831080	1845400	1625500	2186200	874040	1716300	1958900	0	1119500	2236200	1720600	1973700	1200500	1565900	1818300	1445400	2483000	3044000	604170	1610300	2056300	2208800	1178600	1778900	2228000	1849200	3439600	1710600	1750800	1444500	2462900	6283000	11620000
1052	197970	2496100	3513200	2203600	2975700	1217300	5004600	5624000	5151700	6409300	8003500	8895200	7360300	3099100	1674100	0	0	5877200	5421600	0	0	0	0	2371700	2441600	2363500	0	0	0	0	0	0	0	0	0	0	0	0	833150	0	665720	0	553140	2203500	0	997050	5671800	11711000	19938000
1053	260760	2414700	2639400	4229400	4303200	3050800	3794300	4886300	419290	1080900	15878000	22625000	19267000	12725000	6448100	8688600	5167500	9153600	1359500	12947000	16534000	15608000	9075500	5629600	0	0	0	5146700	0	1451100	0	0	0	0	0	0	0	3103600	0	4869800	3401300	5298100	5555100	7296400	7681700	7571200	2497000	27240000	43121000
1054	541000	2548000	2391100	4331100	2845900	2136300	1764100	962470	4709400	2791100	13341000	14022000	17567000	1112500	2888200	4076500	2291900	2037000	826290	1715200	6899900	7169100	1451500	0	0	0	913340	1049400	0	233070	0	0	0	0	0	0	0	0	0	1162800	0	1629500	1637400	0	0	0	503860	11046000	13674000
1055	0	1877200	2128700	2762700	1107000	1195600	1615100	1576400	2229600	3362700	9613700	14513000	8306300	3827200	1640500	0	0	3051700	2706300	9192100	6509800	5342500	3507100	0	0	0	0	0	0	0	0	0	0	0	0	0	0	0	0	0	0	0	0	0	0	0	0	8171400	36827000
1056	0	0	0	0	529320	0	0	0	0	0	0	0	1213500	0	0	1491400	0	2088600	1099100	0	0	0	1852200	0	0	0	1192800	1524400	1399800	0	2635400	2277600	2390600	1460000	738400	1055700	2674500	0	2753400	0	0	0	0	0	0	0	0	1882000	0
1057	0	0	0	0	0	0	0	0	0	0	0	0	0	0	0	0	0	0	0	0	0	0	0	0	0	0	0	0	0	0	0	0	0	0	0	0	0	0	0	3058500	2410100	4102800	0	6581600	924720	1184300	1861000	3301100	10228000
1058	8180300	9451700	8655700	8182100	9700600	9035800	8232500	11988000	11476000	14880000	21442000	19501000	21636000	30521000	17630000	34660000	20771000	36970000	31199000	24495000	31207000	44801000	49420000	58219000	29553000	45046000	47158000	85506000	82303000	87058000	287200000	107040000	54662000	37268000	30305000	78048000	87122000	85674000	121290000	142490000	106910000	125490000	105270000	118030000	138570000	179120000	153790000	180790000	206400000
1059	467860	1811200	2247200	3344200	2078900	2832000	5324800	7947900	5423800	8289400	6818500	7309500	9064300	15880000	4504800	19943000	9128300	21558000	16189000	19966000	19125000	21199000	22217000	29775000	23521000	22951000	22371000	31057000	28807000	28130000	85811000	37680000	14478000	18127000	0	13866000	33842000	10831000	16773000	65573000	53622000	39018000	24209000	33466000	18846000	50207000	68053000	78386000	70299000
1060	2475700	179370	263130	1876700	342860	438750	747980	794650	2767300	834550	4198900	5534600	6493000	2116800	5597000	4600500	4938100	8454800	8541900	12034000	4695800	3410800	8974100	21108000	4195300	6402600	4875000	15487000	21949000	27544000	65003000	7353200	5535900	3514000	6998400	18423000	22131000	33059000	38365000	43084000	28159000	35137000	44710000	59869000	83658000	79575000	86779000	132100000	129140000
1061	0	0	0	0	0	0	0	0	0	0	0	0	0	0	0	0	0	0	0	0	0	0	0	0	0	0	0	0	0	0	0	0	0	0	0	0	0	0	0	597590	0	673320	0	777350	0	615680	0	729390	1717200
1062	0	0	0	0	0	0	0	0	0	0	0	0	0	0	0	0	0	0	0	0	0	0	0	0	0	0	0	0	0	0	0	0	0	0	0	0	0	0	0	0	0	0	0	0	0	0	0	0	2933300
1063	0	0	0	0	0	0	0	0	0	0	0	0	0	0	0	0	0	0	0	0	0	0	0	0	0	0	0	0	0	0	0	0	0	0	0	0	0	0	0	0	0	0	0	0	0	0	1185600	1465700	2018200
1064	0	0	0	0	0	0	0	0	0	0	0	0	0	0	0	0	0	0	0	0	0	0	0	0	0	0	0	0	0	0	0	0	0	0	0	0	0	0	0	0	0	0	0	0	1348900	786010	3900600	6585800	7205100
1065	0	0	0	0	0	0	0	0	0	0	0	0	0	0	0	0	0	0	0	0	0	0	0	0	0	0	0	0	0	0	0	0	0	0	0	0	0	0	0	341240	250250	198460	224840	403420	0	309900	0	2712600	3499200
1066	59200	0	0	0	0	0	0	0	0	0	0	0	0	0	0	0	0	0	0	0	0	0	0	0	0	0	0	0	0	0	0	0	0	0	0	0	0	355160	1107000	2165000	1434000	1875900	1554200	2905900	2900700	1479100	9595800	17050000	38074000
1067	0	0	0	0	0	0	0	0	0	0	0	0	0	0	0	0	0	0	0	0	0	0	0	0	0	0	0	0	0	0	0	0	0	0	0	0	0	0	0	0	0	0	0	0	518060	0	890500	932480	1446500
1068	0	0	0	0	0	0	0	0	0	0	0	0	0	0	0	0	0	0	0	0	0	0	0	0	0	0	0	0	0	0	0	0	0	157950	0	0	0	0	350110	0	0	626000	0	0	0	0	1504200	6205000	1447700
1069	0	0	0	0	0	0	0	0	0	0	0	0	0	0	0	0	0	0	0	0	0	0	0	0	0	0	0	0	0	0	0	0	0	0	0	0	0	0	0	0	0	0	0	215960	0	0	846980	1503700	1898300
1070	922040	4339600	6312100	8354600	4864100	2586700	1256100	319810	805730	204000	213710	1251700	2825800	2417400	517140	0	0	0	0	0	0	0	0	0	0	0	0	0	0	0	0	871870	658300	1535000	0	1477800	0	797910	489440	1415100	1487500	1029600	3128000	835870	1069600	0	1686600	12955000	26562000
1071	0	0	0	0	0	0	0	0	228890	0	0	0	202460	0	0	0	0	0	0	0	0	0	249490	0	233160	0	0	0	110060	0	357870	1358000	1141600	0	0	0	1047500	0	1140800	680460	735570	529530	1831600	3114800	2893200	1199300	3294800	5720800	8474600
1072	5981900	23033000	31244000	45798000	40936000	43664000	50413000	46448000	39705000	29349000	31402000	23770000	22619000	17087000	11115000	11588000	7998800	10454000	3294900	4146500	4014400	4468900	2708300	6063700	8786200	4138700	3158100	5110800	6212300	1894300	6213000	10846000	10423000	6397200	4997300	13067000	44971000	47235000	37240000	45999000	36011000	53920000	54870000	63945000	59325000	88608000	124450000	207560000	295460000
1073	0	0	0	0	0	0	0	0	0	0	0	0	0	0	0	0	0	101770	0	0	0	0	0	0	0	0	0	119670	0	0	0	0	0	207310	0	0	183720	0	259630	1509000	821840	0	558790	0	0	0	1429800	3594300	5789200
1074	0	0	0	0	0	0	0	0	0	0	0	0	0	0	0	0	0	0	0	0	0	0	0	0	0	0	0	0	0	0	0	0	0	0	0	0	0	0	0	0	290810	0	0	550040	0	0	738090	0	1629700
1075	0	0	0	0	0	0	0	0	0	0	0	0	0	0	0	0	0	0	0	0	0	0	0	0	0	0	0	0	0	0	0	0	0	0	0	0	0	0	0	0	0	0	0	0	0	0	0	0	1740200
1076	0	385800	508270	0	0	0	291080	248530	0	347110	0	0	743540	0	0	0	0	0	0	0	0	0	0	0	0	0	832340	872050	748860	0	634760	0	0	0	0	0	0	0	1472500	0	887490	0	728820	1334200	0	0	1107400	1279000	3769100
1077	0	0	0	0	0	0	0	0	0	0	0	0	0	0	0	0	0	0	0	0	0	0	0	0	0	0	0	0	0	0	0	0	0	0	0	0	0	0	0	0	0	0	0	0	0	0	1868600	9546400	11080000
1078	0	0	0	0	0	0	0	0	0	0	0	0	0	0	0	0	0	0	0	0	0	0	0	0	0	0	0	0	0	0	0	0	0	0	0	0	0	1272000	0	0	0	0	0	0	0	1907000	3076200	1856900	7391800
1079	0	0	0	0	0	0	0	0	0	0	0	0	0	0	0	0	0	0	0	0	0	0	0	0	0	0	0	0	0	0	0	0	0	0	0	0	0	0	0	0	0	0	0	0	0	0	4100800	17390000	33886000
1080	0	0	0	0	0	0	0	0	0	0	0	0	0	0	0	0	0	0	0	0	0	0	0	0	0	0	0	0	0	0	0	0	0	0	0	0	0	0	0	0	0	0	0	0	0	0	1994200	2245000	4491100
1081	4364100	16886000	24838000	13680000	12480000	16415000	8387000	5854300	671110	336370	0	0	0	0	0	0	0	0	0	0	0	0	0	0	0	0	0	0	0	0	0	0	0	0	0	9439700	4751000	5673500	7203600	7134000	5097600	13979000	8194300	13839000	0	5394600	7353200	28569000	68214000
1082	0	110600	191910	150010	162010	205300	238010	0	0	0	0	0	0	0	0	0	0	0	0	0	0	0	75985	0	0	0	0	739280	540690	461610	3420700	912470	0	0	0	401120	469970	0	580000	241340	398880	992240	0	1371200	0	0	914560	1870700	3307700
1083	0	0	0	0	0	0	0	0	0	0	0	0	0	0	0	0	0	0	0	0	0	0	0	0	0	0	360620	0	0	0	0	0	921130	767820	0	834960	315980	933060	1141200	564750	0	1073800	1097100	0	0	0	1456300	1804000	767510
1084	0	0	0	0	0	0	100260	275240	0	0	0	0	0	0	0	201020	208350	0	0	0	0	0	0	0	0	0	0	0	0	0	0	0	0	1296600	0	0	796580	0	0	0	793350	542560	1178700	908740	831680	1457800	1532700	1310100	3385400
1085	1672800	624980	358330	413870	466500	854450	275200	304640	352120	0	0	340120	538620	669460	0	0	0	0	0	344980	0	0	0	0	0	0	0	0	451430	378500	551650	954720	648410	0	579020	1037500	2753800	1953200	1427600	2197600	3333000	2505600	2924600	2538300	3893600	9972700	18965000	26987000	43879000
1086	0	0	150340	398760	0	0	0	278180	315560	271220	329120	0	0	0	0	0	0	0	0	0	0	0	0	0	0	0	0	0	0	0	0	0	0	0	0	0	0	0	0	0	307460	0	307310	477670	0	414560	876620	1417000	3770500
1087	0	0	0	0	0	0	0	0	0	0	0	0	784760	0	0	0	0	0	0	0	0	0	0	0	0	0	0	0	0	1041700	1153800	623230	0	0	0	0	0	0	1306100	2471400	1744800	1760700	653050	2833200	0	2206400	3539200	10774000	6919700
1088	262690	631460	744740	797170	876860	778990	1028200	1839700	1783200	2105700	2114300	3203700	3033300	3990900	2766800	4578200	4156400	3607600	3709800	3573200	3633700	3662900	3431500	4331100	4613100	5252000	3132300	5738100	3817100	4279200	7522300	10453000	7078200	6565600	4305100	6854200	5021900	8333500	6737800	11962000	8792400	19236000	14393000	13748000	16998000	13567000	18791000	36837000	54023000
1089	325700	954530	1087800	1001300	983350	730080	689870	830430	736310	715390	1066100	1414500	635690	817960	1079200	1351800	1144700	1869700	724660	888710	772690	819770	404890	0	0	0	949730	1781200	2309100	1950200	4157500	0	7734800	3377600	0	3908600	2726100	3641000	6693600	8257300	10421000	9564800	14324000	25628000	19389000	24941000	52730000	104110000	122700000
1090	0	0	0	0	0	0	0	806330	0	733190	0	0	678840	0	0	0	0	0	0	0	0	0	0	0	0	0	0	0	0	0	0	0	0	0	0	0	0	0	0	0	0	0	0	0	0	0	1910700	8505500	16098000
1091	0	0	0	0	0	0	0	0	0	0	0	0	0	0	0	0	0	0	0	0	0	0	0	0	0	0	0	0	0	0	0	0	0	0	0	0	0	0	0	0	0	0	0	0	0	0	0	0	1642600
1092	0	0	0	0	0	0	0	0	0	0	0	0	0	0	0	0	0	0	0	0	0	0	0	0	0	0	0	0	0	0	0	0	0	0	0	0	0	0	0	0	0	0	0	0	0	0	0	308550	424150
1093	0	0	0	0	370260	0	0	0	0	0	0	639730	0	0	891430	0	0	0	0	0	0	0	0	0	0	0	0	566430	985870	677940	771470	1204400	820220	0	0	1056400	814500	0	812940	836690	890230	1535800	0	0	0	0	0	0	1679100
1094	0	0	0	0	0	0	0	0	0	0	0	0	0	0	0	0	0	0	0	0	0	0	0	0	0	0	0	0	0	0	0	0	0	0	0	0	0	0	0	0	0	0	0	0	0	0	0	0	0
1095	0	0	0	0	0	0	0	0	0	0	0	0	0	0	0	0	0	0	0	0	0	0	0	0	0	0	0	0	0	0	0	0	0	0	0	0	0	0	0	0	0	0	0	0	0	0	0	0	0
1096	0	0	0	0	0	0	0	0	0	0	0	0	0	0	0	0	0	0	0	0	0	0	0	0	0	0	0	0	0	0	0	0	0	0	0	0	0	0	0	0	0	0	0	0	0	0	437070	2554900	3296600
1097	44575	186200	206160	218830	200770	57281	100860	0	0	132390	147790	0	282770	188170	0	344800	0	0	217110	0	0	0	518080	486020	0	0	0	990080	853920	305060	2763800	0	549180	256040	0	0	1069300	1658800	507800	3038000	2088500	1808600	880660	1681000	2692700	1860100	6410700	15498000	23505000
1098	0	62320	292430	90732	575180	1073500	1307500	1758400	2407600	1302800	2257000	939250	619370	403280	315610	1217200	2683200	1242100	375520	599610	626640	832010	3530700	529240	1288100	1079100	432460	1992400	2566600	1646600	3043600	2827500	3160000	4344100	1517800	5878800	3255700	5599000	3079200	3821400	6915600	10496000	3713400	3342700	3785800	2708600	8013400	26395000	20735000
1099	0	1071100	1414200	618670	1184500	1171400	1996500	1201200	2758600	2700200	2186500	2235800	1584200	1796400	1980900	4845300	0	0	3656100	5200500	0	6576400	8047100	8842900	7160000	3912300	352340	7126200	6087200	5608000	7571400	10342000	8912300	5517900	2942900	3444400	6380600	7515800	7088000	13006000	11187000	10275000	6315300	3563100	3749000	2182700	8349200	17764000	21869000
1100	0	0	0	103840	0	0	364950	492670	655180	645720	1122700	1308100	1167800	1207700	587880	1120200	0	690920	717560	696130	784750	632460	1003000	697390	1497100	722110	1964400	2562300	2420900	2868900	9838000	10120000	4833400	11433000	6994100	2992900	10689000	7599200	11749000	10260000	9309700	15440000	9282300	18817000	9692400	3078700	11858000	29383000	20174000
1101	150660	161640	246440	0	649510	651120	0	559260	1005600	453720	0	602490	1893600	1895200	0	722140	0	569550	1555200	1671400	0	5086000	2574500	1808500	0	924960	479060	5303100	3429700	1488200	5561700	4099000	5693200	2926900	1751000	3174500	1114800	2887900	2560800	4160400	2322500	5309600	3635700	4336800	3497000	0	3257400	4413300	3409200
1102	179420	861180	1121500	1343300	1160400	1328400	1828200	2590300	3151000	3482100	4232500	5501300	5518700	5418600	4143800	6657800	2168600	5187200	3519900	5365800	3686900	5182300	5975200	2141400	2981200	1888700	4166600	4435500	8644800	7766500	11220000	6156600	4818200	3013200	1316200	1137600	7907800	3140100	6111300	9191400	5550300	2878300	2740500	3313600	2378900	2461800	6579200	8567900	3994000
1103	69806	186730	198420	249070	211670	271650	308740	465080	544930	0	625200	740100	719170	0	635410	962930	676670	1195400	0	1026600	759450	1157100	941050	1546300	1582000	1217500	825470	1097200	1240600	1248700	1256000	0	0	0	0	0	981700	0	389610	939830	999890	1121700	554640	692770	1779800	2029900	1299700	3014100	3900900
1104	0	0	0	0	0	0	0	0	0	0	0	0	0	0	0	0	0	0	0	0	0	0	0	0	0	0	0	0	0	0	0	0	0	0	0	0	0	0	0	887380	0	0	0	0	0	0	431140	1383400	1290900
1105	0	0	0	0	0	0	0	0	0	0	0	0	0	0	0	0	0	0	0	0	0	0	0	0	0	0	0	0	0	0	0	0	0	0	0	0	0	0	0	0	0	0	0	0	0	0	0	957930	3650200
1106	0	0	0	0	0	0	0	0	0	0	0	0	0	0	0	0	0	0	0	505400	0	0	1625400	0	0	0	0	0	1647800	0	1015800	992700	721980	0	0	2066200	366110	846830	2481500	2054500	0	0	0	444300	0	0	534620	2215700	7273200
1107	0	0	0	0	0	0	0	75394	124520	93702	0	0	0	0	0	0	0	0	0	0	0	199710	196370	0	0	0	208230	0	277190	195710	417940	381950	294410	0	0	430090	267740	778320	336980	431630	351500	0	0	915820	646840	0	1053100	2774100	3194100
1108	0	0	0	0	0	0	0	0	0	0	0	0	0	0	0	0	0	0	0	0	0	0	0	0	0	0	0	0	0	0	0	0	0	0	0	0	0	0	0	0	0	0	0	0	0	0	0	0	1277800
1109	0	0	0	0	0	0	0	0	0	0	0	0	0	0	0	0	0	0	0	0	0	0	0	0	0	0	0	0	0	0	0	0	0	0	0	0	0	0	0	0	0	0	0	0	0	0	0	0	2699400
1110	0	0	0	0	0	0	0	0	0	0	0	0	0	0	0	0	0	0	0	0	0	0	0	0	0	0	0	0	0	0	0	0	0	0	0	0	0	0	0	0	0	0	0	0	0	0	0	0	1689400
1111	0	0	0	0	0	0	0	0	0	0	0	0	0	0	0	0	0	0	0	0	0	0	0	0	0	0	0	0	0	0	0	0	0	0	0	0	505050	539680	832040	1901900	3312100	1828000	2542100	1528400	0	692700	828500	0	2405000
1112	0	0	0	0	104520	0	85566	0	0	0	0	0	0	0	0	0	0	0	0	0	0	796620	0	0	0	0	0	1680600	1356200	642160	765160	1846800	0	0	0	1264200	2619000	7556000	3082700	12102000	9470400	14191000	8153700	7059900	4939500	4168600	5780700	11492000	20076000
1113	0	0	0	0	0	0	0	0	0	0	0	0	0	0	0	0	0	0	0	0	0	0	0	0	0	0	0	0	0	0	0	0	0	0	0	0	2921900	3490000	0	3281200	3345700	4221900	3170800	3116200	0	0	0	4674000	8004000
1114	55009	143140	180900	150180	189670	0	0	185370	401600	428900	729910	1397200	0	642060	870500	1253600	0	526540	942500	555900	1937700	576030	437270	1412600	1388500	1226900	970360	787420	2696100	1713100	4612500	4434000	2695700	1189500	1118400	4985200	3352200	4729000	4279000	6286300	5198000	7634700	6339400	3383000	2553400	2752500	5572300	8837300	12871000
1115	0	63538	544600	702550	562960	417010	1123400	1240300	1386200	1599900	1592400	261640	243510	279280	0	0	208650	0	0	0	0	0	0	485560	0	0	1219500	455500	1781500	1759200	1122900	912280	3295600	10731000	1209500	11407000	13086000	13787000	17911000	11066000	11473000	14626000	11555000	3979800	10986000	2689100	16243000	25830000	42318000
1116	0	0	0	0	0	0	0	0	0	0	0	0	0	0	0	0	0	0	0	0	0	0	0	0	0	0	0	0	0	0	0	0	0	0	0	0	0	0	0	0	0	0	0	0	0	0	2217500	7705500	6306500
1117	0	0	0	0	0	0	0	0	0	0	0	0	0	0	0	0	0	0	0	0	0	0	0	0	0	0	0	0	0	0	0	0	0	0	0	0	0	0	0	0	0	0	0	0	0	0	0	0	2067800
1118	283960	900380	3038300	2518900	2177600	3305300	3878200	5699400	5992800	5338500	9070500	3451600	5989600	6226300	2585300	3785400	3409600	4521500	5162400	6240900	3484400	9696800	4365900	6511500	7369600	4866000	1669500	11405000	10485000	13121000	16211000	8708500	7323200	465420	3323100	10293000	17128000	10122000	12735000	19571000	21275000	16442000	16701000	14453000	17056000	12759000	25742000	43745000	54118000
1119	0	0	0	0	0	0	0	0	0	0	0	0	0	0	0	0	0	0	0	0	0	0	0	0	0	0	0	0	0	0	0	0	0	0	0	0	0	0	0	0	0	0	0	0	0	0	0	503090	732920
1120	0	0	0	0	0	0	0	0	0	0	0	0	0	0	0	0	0	0	0	0	0	0	0	0	0	0	0	0	0	0	0	0	0	0	0	0	0	0	0	0	0	0	0	0	0	0	569350	1034900	2894200
1121	2277100	5714200	6602900	7347700	6200600	6067600	9025400	13593000	15279000	10543000	16544000	13856000	14045000	15467000	12051000	19763000	17111000	18818000	14708000	18078000	12463000	21121000	23927000	23672000	32147000	29815000	19060000	30114000	29664000	34000000	62355000	65636000	60431000	46010000	37156000	50256000	44473000	27761000	27215000	36626000	39987000	57752000	57599000	83685000	85796000	95146000	188090000	422740000	598770000
1122	0	74680	111300	131620	131420	119740	0	0	227920	561370	927110	2064000	672090	753900	510580	939490	649150	999700	849640	0	1096500	0	1096300	0	0	1471900	1118300	2742800	2194500	1608700	6665200	4213600	652670	436640	313430	3506200	2056400	1263500	4357100	4168400	2516700	6190000	4960100	4317700	3791900	13580000	48818000	118110000	186330000
1123	1156000	1013200	372280	398450	332890	2359400	336110	366100	408980	424960	495240	248140	0	0	553970	778700	0	556870	546000	755160	556220	638370	802830	0	1156800	0	0	0	262250	4223200	3130500	5098100	2811000	566100	1362200	3636700	3068800	5728200	5160800	8181700	7125300	11063000	8234700	20216000	23192000	59964000	87648000	215700000	242670000
1124	0	33817	58278	61576	47860	47587	66882	248220	216150	110420	130900	142710	0	0	0	0	0	0	0	0	0	0	0	0	0	0	0	0	0	0	0	0	0	0	0	0	0	0	0	0	217390	761540	938440	286020	0	0	1146900	1435900	3857200
1125	0	0	0	0	0	0	0	0	0	0	0	0	0	0	0	0	0	0	0	0	0	0	0	0	0	0	0	0	0	0	631060	0	0	0	0	0	0	570830	0	0	444850	139260	737160	2189300	1214600	958630	3301400	6138100	9734100
1126	1443800	5508100	6980800	6898900	3767800	2338900	1510200	324710	634300	185150	0	0	0	0	0	0	0	0	0	0	0	0	0	0	0	0	0	0	0	0	0	0	0	0	0	823510	0	0	0	0	1063200	511430	0	0	0	4273600	19524000	32787000	54979000
1127	0	0	0	0	0	0	0	0	0	0	0	0	0	0	0	0	0	0	0	0	0	0	0	0	0	0	0	0	0	0	0	0	0	0	0	0	230900	0	0	0	0	0	0	0	0	0	720740	3950800	5614400
1128	0	0	0	0	0	0	0	0	0	0	0	0	0	0	0	0	0	0	0	0	0	0	0	0	0	0	0	0	0	0	0	0	0	0	0	0	0	0	0	0	0	0	0	0	0	0	567860	2585700	4946200
1129	0	0	0	0	0	0	0	0	0	0	0	0	0	0	0	0	0	0	0	0	0	280740	71142	0	0	0	0	469440	0	351020	0	0	211360	0	0	412050	388550	450810	712640	591980	663260	802580	751220	1601600	1462600	2166900	7007700	5441500	7384400
1130	0	0	0	0	0	0	63971	0	0	0	0	0	0	150480	0	0	0	0	0	0	0	0	233180	0	0	0	0	264530	368040	322420	551820	283480	0	0	0	547800	0	0	0	427430	347590	689770	505510	0	967640	830350	3975400	7129400	10719000
1131	0	0	85981	97389	0	0	0	0	0	0	0	0	0	0	0	0	0	0	0	0	0	0	0	0	0	0	0	0	0	0	0	0	0	0	0	0	0	0	0	1000400	647720	0	0	0	0	1977900	5380100	19519000	32665000
1132	0	0	0	0	0	0	0	0	0	0	0	0	0	0	0	0	0	0	0	0	0	0	0	0	0	0	0	0	0	0	0	0	0	0	0	0	0	0	0	0	0	392080	0	513190	709440	0	2912100	8515500	11574000
1133	0	0	0	0	0	0	0	0	0	0	0	0	0	0	0	0	0	0	0	0	0	0	0	0	0	0	0	0	0	0	0	0	0	0	0	0	0	0	0	0	0	0	0	0	0	1356800	2387100	5956600	9234700
1134	0	0	0	0	0	0	0	0	0	0	0	0	0	0	0	0	0	0	0	0	0	0	0	0	0	0	0	0	0	0	0	0	0	0	0	0	0	0	0	0	0	0	0	0	0	0	0	3006000	5986800
1135	0	0	0	0	0	0	0	0	0	0	0	0	0	0	0	0	0	0	0	0	0	0	0	0	0	0	0	0	0	0	0	0	0	0	0	0	0	0	0	0	0	0	0	0	0	0	0	396370	693740
1136	0	0	0	0	0	0	0	0	0	0	0	0	0	0	0	0	0	0	0	0	0	0	0	0	0	0	0	0	0	0	0	0	0	0	0	0	0	0	0	0	0	0	0	0	0	0	923180	2171600	6306700
1137	0	0	0	0	0	0	0	0	0	0	0	0	0	0	0	0	0	0	0	0	0	0	0	0	781070	0	0	625690	0	0	0	0	0	0	0	0	0	0	0	626770	964920	1674700	1530100	3966000	3826100	1922000	8637600	17219000	18797000
1138	0	0	0	0	0	0	0	0	0	0	0	0	0	0	0	0	0	257070	0	0	352040	0	566750	405920	681210	0	0	188570	332540	0	396750	0	0	0	0	0	663620	0	384960	1387100	0	0	0	1061800	965300	3467700	4949200	9459000	10556000
1139	0	0	0	0	0	0	0	0	0	0	0	0	0	0	0	0	0	0	0	0	0	0	0	0	0	0	0	0	0	0	0	0	0	0	0	0	0	0	0	0	210610	0	350930	844680	1460100	3778500	7662200	13190000	11699000
1140	276230	1097000	1077200	2471300	1830500	1899600	2901200	3291800	4002900	2923900	3417800	4486900	4941300	4893000	3678700	6592400	1959300	3585400	4340000	9614000	6953900	7116800	6715500	2366700	3624500	5002600	2532200	9093200	8780700	10245000	17458000	11580000	7489000	9857800	2670400	15313000	21731000	13371000	14181000	15295000	10113000	16093000	17415000	21036000	16914000	24770000	37159000	66413000	101740000
1141	4634600	16377000	20363000	22354000	19698000	8118400	4860400	3265000	1044500	731910	1674300	2035500	2381100	1478300	1063000	1248200	0	883590	843480	1560300	1575500	2406600	1898800	0	685720	2529000	1038200	3364300	7418700	5349000	12412000	12629000	16832000	10757000	8170900	17177000	23664000	20140000	20546000	46165000	33084000	28489000	67949000	98009000	136560000	172780000	219530000	394710000	505850000
1142	0	0	0	0	0	0	0	0	0	0	0	0	0	209680	0	0	0	0	0	0	0	0	0	0	0	0	0	171960	0	0	239000	0	180010	0	0	0	479700	345780	562930	1767900	1035700	761630	662210	2694200	1957300	1823200	2643300	3876700	5926000
1143	390530	1146400	1304300	2750000	1932500	1927600	2565000	3578300	4286600	3735300	4936700	2194400	9247500	6517300	4011600	5891200	2944500	3694800	4117400	4060700	3324200	4123400	3030300	1218700	15746000	12362000	3373300	4452700	4114900	4190100	12214000	13439000	8552500	8208800	11806000	15462000	13488000	16363000	17392000	31344000	20595000	61344000	60487000	79783000	49456000	41013000	57793000	92560000	196810000
1144	0	0	0	0	0	0	0	0	0	0	0	0	0	0	0	0	0	0	0	0	0	0	0	0	0	0	0	0	0	0	0	0	0	0	0	0	0	0	0	0	0	0	0	1136500	1416300	2667300	775080	4569600	10016000
1145	0	140240	0	505090	491670	277100	726490	560870	853970	864420	793300	1378300	1007200	1062300	223310	1239100	0	440490	230160	796010	1250000	2069400	1682200	374580	507910	560680	259280	858870	3105800	2262500	5536500	2236600	2457200	1320700	764470	1289300	4375000	2897400	3509000	5201600	4134800	4073600	3647400	7808400	8430500	9577300	12220000	48827000	28086000
1146	1756100	2251400	2918300	2364400	2703900	1253300	946770	1815100	2667900	1972300	1613500	1952700	3887200	2407500	2223500	337080	1046300	2181900	545480	334480	2533500	2435700	4525300	3383600	1781500	2295100	3009600	8822800	8896100	8500600	16773000	14720000	12532000	12982000	7629100	15219000	19072000	18475000	26026000	53906000	46782000	88887000	125710000	246230000	314950000	399230000	532100000	771840000	759620000
1147	63977	163080	325490	390250	508720	274270	663310	744330	1262800	612060	890360	615550	1150400	1309900	1037400	1511400	332700	1274600	1286900	1540400	1265700	1572400	1335100	1627800	1793900	456560	1521400	1972200	497560	1142600	3132700	3239700	2767100	4371000	1836300	3677000	4024600	4574000	3572300	4807200	7091400	7073600	8583900	7096600	12044000	5003800	10976000	19318000	15054000
1148	0	305550	405880	142510	143850	120610	463130	262740	865680	698890	321900	355840	449340	249680	247640	248440	0	999070	763190	1128600	998020	825550	283930	1053000	637140	868590	310950	1233500	1576200	857460	932960	436520	383900	621700	0	1098600	1873400	752050	1191700	1690800	920790	1101900	3299500	2139600	1708400	840530	2657200	5701600	4454600
1149	0	0	0	0	0	0	0	0	0	0	0	0	0	0	0	0	0	0	0	0	0	0	0	0	0	0	0	0	0	0	0	0	0	0	0	0	0	0	0	0	0	0	0	0	0	0	877500	0	1239900
1150	0	345310	400550	487560	468080	204100	199790	0	0	0	0	0	481880	0	0	0	0	0	0	0	0	0	0	0	0	0	0	0	0	0	0	0	0	0	0	0	1537000	0	0	0	464240	0	0	0	0	0	1214900	2746500	13831000
1151	0	0	0	0	0	0	0	0	0	0	0	0	0	0	0	0	0	0	0	0	0	0	0	0	0	0	0	0	0	0	0	0	0	0	0	0	0	0	0	0	0	0	0	0	0	0	0	0	674720
1152	0	0	0	0	0	0	0	0	0	0	0	0	0	0	0	0	0	0	0	0	0	0	0	0	0	0	0	0	0	0	0	0	0	0	0	0	0	0	0	0	0	0	0	0	0	0	800560	1375200	2168000
1153	111300	58382	122630	164350	1008500	604390	106900	1613800	207820	176310	1448300	928050	210980	873630	472250	978630	622430	609860	420410	295380	0	0	0	0	0	0	0	0	0	0	0	451650	0	0	0	0	0	630740	753320	0	0	288760	0	978360	0	0	580640	5409100	7337100
1154	0	223100	277400	877780	547120	611610	1060600	1540600	1916100	1654700	1530600	1163200	807450	752230	293680	833870	0	334220	336400	0	0	277770	255580	0	0	0	0	0	0	0	0	0	0	0	0	0	0	0	0	0	0	0	0	346210	0	0	3140000	7284600	8281400
1155	0	0	0	0	0	0	0	0	0	0	0	0	0	0	0	0	0	0	0	0	0	0	0	0	0	0	0	0	0	0	0	0	0	0	0	364090	0	0	0	0	0	0	0	0	0	1077100	2048500	2937500	4411700
1156	0	0	0	0	0	0	0	108620	0	0	0	0	0	0	0	0	0	0	0	0	0	0	0	0	0	0	0	0	0	0	0	0	0	0	0	538810	528640	535990	593900	0	872990	892600	2159100	0	1705300	560620	1679800	7697800	22823000
1157	0	0	0	0	0	0	0	0	0	0	0	0	0	0	0	0	0	0	0	0	0	0	0	0	0	0	0	0	0	0	0	0	0	0	0	0	0	0	0	0	0	0	0	0	0	0	0	1343500	4327500
1158	0	174230	0	378790	0	0	299780	0	404500	433390	479270	797830	804810	0	720670	2136300	0	1348700	1799700	1600900	0	0	1399600	0	0	0	0	0	0	0	0	0	0	0	0	0	0	657180	737860	1185800	1268500	1756000	1499200	3762200	0	0	3191400	5511600	13527000
1159	0	0	0	0	0	0	0	0	0	0	0	0	0	0	0	0	0	0	0	0	0	0	0	0	0	0	0	0	0	0	0	0	0	0	0	0	0	0	0	0	0	0	0	0	0	0	0	0	7934400
1160	208420	1840900	1068000	1877900	2699600	637880	927700	1420100	3376300	0	2624100	2131600	3303900	8845000	4087000	2030800	2810200	558990	0	500140	0	0	0	0	0	0	0	375210	489160	1520800	2130600	175190	365090	573120	443350	687050	1092700	2617800	2619900	720180	367010	469080	412040	0	938860	520600	488430	856850	20073000
1161	0	0	0	0	0	0	0	0	0	731890	811380	1009100	0	1750600	0	0	0	0	958680	0	0	0	0	0	0	0	0	0	0	0	0	0	0	0	0	0	0	0	0	2988200	0	976700	0	0	0	0	0	1653300	3031700
1162	397650	2672100	3645100	3296100	2945400	2316800	1081100	618790	0	0	0	0	0	0	0	0	0	0	0	0	0	0	0	0	0	0	0	1116800	727940	1361900	2750000	0	3087900	4277800	3749400	8754500	5724200	3033000	544600	929490	284470	816220	438660	795950	0	1559000	5955900	11731000	12175000
1163	0	0	547830	657950	0	1041700	242250	1668400	383420	424310	527750	709040	762900	0	0	0	0	0	0	0	0	919980	2668900	681020	0	0	550690	3140900	2873600	2675700	2584900	1376200	2068600	1142400	0	3030100	1204400	1226800	1141000	1355000	1193000	1905700	1348700	2537900	2619300	2791200	6003800	8631000	7052200
1164	0	335580	229200	480160	509860	214750	0	0	0	404390	0	0	0	931330	0	0	726210	0	0	0	0	0	742530	0	0	0	0	359320	932610	1125100	2361700	3883200	582290	1530200	1530200	2862300	3382100	1212100	2749900	2681900	2422800	1831700	1880900	2326800	2420500	5032400	3857000	4919300	8417100
1165	0	0	0	0	0	0	0	1240300	0	681810	0	939450	0	0	0	0	0	1158800	0	0	0	0	0	0	0	0	1355400	1288400	1361700	1082300	3351500	5347400	1151100	0	0	508860	0	295360	2625500	2752200	3711600	352840	3726800	1648300	598860	1476900	1439000	3378600	4247200
1166	0	0	0	46750	0	129900	106750	188900	0	430510	158600	172950	0	0	0	0	0	0	0	440290	0	0	597310	496630	0	0	0	0	532860	571730	1274000	1947400	370260	0	0	0	432000	0	0	0	928650	644390	498440	0	0	413040	468050	1578300	2804900
1167	0	0	0	0	0	0	0	0	0	0	0	0	0	0	0	0	0	0	0	0	0	0	0	0	0	0	0	0	0	0	1095400	724120	0	0	0	0	820850	0	391140	1505100	876460	0	0	0	0	0	0	0	1650700
1168	0	0	0	0	0	0	0	518860	0	0	0	0	0	0	0	0	0	0	369740	0	565440	624210	0	705870	1443900	1004200	0	487030	1416500	1793900	2313900	3396600	1391600	3157400	2528900	1389000	1033500	7504500	12497000	7799000	5669800	4719600	5006800	2129600	2416900	678920	2288200	4877100	11305000
1169	122260	1695600	2292800	2493500	4741000	5663000	8862600	10393000	8156900	6664100	8042400	4307900	4733000	4897500	2886100	1613900	1769600	4838700	2759400	3504700	2645500	3209700	4164700	3725200	3973000	4803600	4588100	10163000	8463100	5770900	11893000	8382100	9772300	7000400	6825300	13906000	26318000	32428000	41980000	54265000	32382000	40719000	30646000	29535000	18552000	16629000	26009000	47719000	47725000
1170	1609800	963470	584050	1018200	519310	958190	999100	2135600	2803900	1920900	2281700	0	2884700	2934700	2492100	2888100	0	0	0	0	0	0	0	0	0	0	0	2898600	3453300	2397900	5023200	0	0	0	0	0	0	0	0	3781700	0	0	5209700	0	0	0	0	0	9583900
1171	0	0	365250	0	1034600	784150	1297900	2087700	3455300	2613000	5318600	4340400	7398100	3589100	0	913740	4198900	4499800	0	3376600	0	0	1900100	0	0	0	0	0	0	0	0	1910100	3768900	4839300	0	0	0	0	1702100	4151100	4379400	8043700	9119300	11842000	21448000	5810100	3019700	2558500	3497800
1172	0	0	0	0	0	0	0	0	0	0	0	0	0	0	0	0	0	0	0	0	0	0	0	0	0	0	0	0	0	0	0	0	0	0	0	0	0	0	0	0	0	0	0	0	0	0	0	0	0
1173	0	0	0	0	0	0	0	0	0	0	0	0	0	0	0	0	0	0	0	0	0	0	0	0	0	0	0	0	0	0	0	0	0	0	0	0	0	0	0	0	0	0	0	0	0	0	0	0	0
1174	0	0	0	0	0	0	0	0	0	0	0	0	0	0	0	0	0	0	0	0	0	0	0	0	0	0	0	0	0	0	0	0	1955800	1725900	0	0	0	0	0	0	632990	0	3594700	4651700	0	0	0	0	0
1175	0	0	0	0	0	0	0	0	0	0	0	0	0	0	0	0	0	0	0	0	0	0	0	0	0	0	0	0	0	0	0	0	0	0	0	0	0	0	0	0	0	0	0	0	0	0	0	0	0
1176	0	0	0	0	0	0	0	0	0	0	0	0	0	0	0	0	0	0	0	0	0	0	0	0	0	0	0	0	0	0	0	0	0	0	0	0	0	0	0	0	0	0	0	0	0	0	0	0	0
1177	0	0	0	0	0	0	0	0	0	0	0	0	0	0	0	0	0	0	0	0	0	0	0	0	0	0	0	0	0	0	0	0	0	0	0	0	0	0	0	0	0	0	0	0	0	0	0	0	0
1178	0	0	0	0	0	0	0	0	0	0	0	0	0	0	0	0	0	0	0	0	0	0	0	0	0	0	0	0	0	0	0	0	0	0	0	0	0	0	0	0	0	0	0	0	0	0	0	0	0
1179	0	0	0	0	0	0	0	0	0	0	0	0	0	0	0	0	0	0	0	0	0	0	0	0	0	0	0	0	0	0	0	0	0	0	0	0	0	0	0	0	0	0	0	0	0	0	0	0	0
1180	0	0	0	0	0	0	0	0	0	323690	0	0	0	0	0	0	0	0	0	0	0	0	0	0	0	0	0	0	0	0	0	0	0	0	0	0	0	0	0	0	1353700	0	0	0	0	0	2285500	0	1410500
1181	0	0	0	0	0	0	0	0	0	0	0	0	0	0	0	0	0	0	0	0	0	0	0	0	0	0	0	0	0	0	0	0	0	0	0	742060	0	0	0	179080	0	0	293320	0	0	0	0	419050	548440
1182	0	0	0	0	0	188560	0	0	1236900	881650	515900	826610	1453800	0	0	166070	0	0	0	0	0	0	0	0	0	0	390350	0	635610	0	0	0	0	0	0	0	0	0	0	0	0	0	0	0	0	0	2578100	0	1626300
1183	0	0	0	0	0	0	0	0	0	0	0	0	0	0	0	0	0	0	0	0	0	0	0	0	0	0	0	0	0	0	0	0	0	0	0	0	0	0	0	0	0	0	0	0	0	0	0	0	0
1184	0	0	0	0	0	0	0	0	0	0	0	0	0	0	0	0	0	0	0	0	0	0	0	0	0	0	0	0	0	0	0	0	0	0	0	0	0	0	0	0	0	0	0	0	0	0	0	0	0
1185	0	0	0	0	0	0	0	0	0	0	0	0	0	0	0	0	0	0	0	0	0	0	0	0	0	0	0	0	0	0	0	0	0	0	0	0	0	0	0	0	0	0	0	0	0	0	0	0	0
1186	0	0	0	0	0	0	0	0	0	0	0	0	0	0	0	0	0	0	0	0	0	0	0	0	0	0	0	0	0	0	0	0	0	0	0	0	0	0	0	0	0	0	0	0	0	0	0	0	0
1187	0	0	0	0	0	0	0	0	0	0	0	0	0	0	0	0	0	0	0	0	0	0	0	0	0	0	0	0	0	0	0	0	0	0	0	0	0	0	0	0	0	0	0	0	0	0	0	0	0
1188	0	0	0	0	0	0	0	0	0	0	0	0	0	0	0	0	0	0	0	0	0	0	0	0	0	0	0	0	0	0	0	0	0	0	0	0	0	0	0	0	0	0	0	0	0	0	0	0	0
1189	0	0	0	0	0	0	0	0	0	0	0	0	0	0	0	0	0	0	0	0	0	0	0	0	0	0	0	0	0	0	0	0	0	0	0	0	0	0	0	0	0	0	0	0	0	0	0	0	0
1190	0	0	0	0	0	0	0	0	0	0	0	0	0	0	0	0	0	0	0	0	0	0	0	0	0	0	0	0	0	0	0	0	0	0	0	0	0	0	0	0	0	0	0	0	0	0	0	0	0
1191	216030	166590	139250	190020	293870	148110	0	291560	0	0	0	0	0	0	0	0	0	0	0	0	0	0	0	0	0	0	0	0	0	0	0	0	0	0	0	0	0	0	0	0	104640	0	0	0	0	0	0	687320	0
1192	0	239980	266390	569610	505670	131660	454100	363880	433340	498340	532730	577430	654670	619250	0	0	0	0	0	0	0	0	0	0	0	0	0	0	0	0	0	0	0	0	0	0	0	0	0	0	0	0	0	0	0	0	0	0	0
1193	0	0	0	475190	376510	419930	0	488410	835760	121880	0	0	0	0	0	0	0	0	0	0	0	0	0	0	0	0	0	0	0	0	0	0	0	0	0	0	0	0	0	0	0	0	0	0	0	0	0	0	0
1194	0	0	0	0	0	0	0	0	0	0	0	0	0	0	0	0	0	0	335470	0	0	0	0	0	0	0	0	0	0	0	0	0	0	0	0	0	0	0	0	0	0	0	0	0	0	0	0	0	0
1195	0	0	0	0	0	0	0	0	0	0	0	0	0	0	0	0	0	0	0	0	0	0	0	0	0	0	0	0	0	0	0	0	0	0	0	0	0	0	0	0	0	0	0	0	0	0	0	0	0
1196	0	0	0	0	0	0	0	0	0	0	0	0	0	0	0	0	0	0	0	0	0	0	0	0	0	0	0	0	0	0	0	0	0	0	0	0	0	0	0	0	0	0	0	0	0	0	0	0	0
1197	0	0	0	0	0	0	0	0	0	0	0	0	0	0	0	0	0	0	0	0	0	0	0	0	0	0	0	0	0	0	0	0	0	0	0	0	0	0	0	0	0	0	0	0	0	0	0	0	160980
1198	0	0	0	0	0	0	0	0	0	0	0	0	0	0	0	0	0	0	0	0	0	0	0	0	0	0	0	0	0	0	0	0	0	0	0	0	1497400	884400	804830	524600	484430	550440	1394100	622890	0	0	0	1572400	2530900
1199	41861	0	128750	294590	0	206840	175850	910480	559450	290770	371730	0	0	0	0	0	0	0	0	0	0	0	418940	0	0	0	0	289750	0	0	0	0	0	0	0	0	1401500	505420	2168200	661660	439740	0	0	0	0	0	0	0	1278500
1200	0	0	0	0	0	0	0	0	0	0	0	0	0	0	0	0	0	0	0	0	0	0	0	0	0	0	0	0	0	0	0	0	0	0	0	0	1465600	414000	0	0	0	0	0	0	0	0	0	0	0
1201	0	0	0	0	0	0	0	0	0	0	0	0	0	0	0	0	0	0	0	0	0	0	0	0	0	0	0	0	0	0	0	0	0	0	0	0	0	0	0	0	0	0	0	0	0	0	0	0	0
1202	0	0	0	0	0	0	0	0	0	0	0	0	0	0	0	0	0	0	0	0	0	0	0	0	0	0	0	0	0	0	0	0	0	0	0	0	0	217780	0	0	0	0	0	0	0	0	0	0	0
1203	0	405800	142120	816330	459700	689030	351870	314850	325410	390830	1242200	2260600	2421500	3157400	1841900	4007300	2305200	3802100	1678100	2909700	2842300	2994300	2636900	865260	644510	2176100	2136800	2504700	5570500	2908200	8326000	2457900	2908000	4691500	644570	5357400	4779900	4765300	1009500	5253200	1157000	4981100	4712000	3476100	1256000	0	1638000	3533100	13461000
1204	0	0	0	0	0	0	0	0	0	0	0	0	0	0	0	0	0	0	0	0	0	0	0	0	0	0	0	0	0	0	0	0	0	0	0	0	0	0	0	0	0	0	0	0	0	0	0	0	0
1205	0	0	0	0	0	0	0	0	0	0	0	0	0	0	0	0	0	0	0	0	0	0	0	0	0	0	0	0	0	0	0	0	0	0	0	0	0	0	0	0	0	0	0	0	0	0	0	0	0
1206	0	0	0	0	0	0	0	0	0	0	0	0	0	0	0	0	0	0	0	0	0	0	0	0	0	0	0	0	0	0	0	0	0	0	0	0	0	0	0	0	0	0	0	927470	2920400	2329400	3572100	11281000	2986200
1207	0	0	0	0	0	0	0	0	0	0	0	0	0	0	0	0	0	0	0	0	0	0	0	0	0	0	0	0	0	0	0	0	0	0	0	0	0	0	0	0	0	0	0	0	0	0	0	0	0
1208	0	0	0	0	0	0	0	0	0	0	0	0	0	0	0	0	0	0	0	0	0	0	0	0	0	0	0	0	0	0	0	0	0	0	0	0	0	0	0	0	0	0	0	0	0	0	0	0	0
1209	0	0	0	0	0	0	0	0	0	0	0	0	0	0	0	0	0	0	0	0	0	0	0	0	0	0	0	0	0	0	0	0	0	0	0	0	0	0	0	0	0	0	0	0	0	0	0	0	0
1210	0	0	0	0	0	0	0	0	0	0	0	0	0	0	0	0	0	0	0	0	0	0	0	0	0	0	0	0	0	0	0	0	0	0	0	0	0	0	0	0	0	0	0	0	0	0	0	0	0
1211	0	0	0	0	0	0	0	0	0	0	0	0	0	0	0	0	0	0	0	0	0	0	0	0	0	0	0	0	0	0	0	0	0	0	0	0	0	0	0	0	0	0	0	0	0	0	0	0	0
1212	0	0	0	0	0	0	0	0	0	0	0	0	0	0	0	0	0	0	0	0	0	0	0	0	0	0	0	0	0	0	0	0	0	0	0	0	0	0	0	0	0	0	0	0	0	0	0	0	0
1213	0	0	0	0	0	0	0	0	0	0	0	0	0	0	0	0	0	0	0	0	0	0	0	0	0	0	0	0	0	0	0	0	0	0	0	0	0	0	0	0	0	0	0	0	0	0	0	0	0
1214	0	0	0	0	0	0	0	0	0	0	0	0	0	0	0	0	0	0	0	0	0	0	0	0	0	0	0	0	0	0	0	0	0	0	0	0	108950	0	0	1200100	542020	857940	742400	1389800	735930	322810	3762900	9858800	26965000
1215	0	0	0	0	0	0	0	0	0	0	0	0	0	0	0	0	0	0	0	0	0	0	0	0	0	0	0	0	0	0	0	0	0	0	0	0	0	0	0	0	0	0	0	0	0	0	0	0	0
1216	0	0	0	0	0	0	0	0	0	0	0	0	0	0	0	0	0	0	0	0	0	0	0	0	0	0	0	0	0	0	0	0	0	0	0	0	0	0	0	0	0	0	0	0	0	0	0	0	0
1217	0	0	0	0	0	0	0	0	0	0	0	0	0	0	0	0	0	0	0	0	0	0	0	0	0	0	0	0	0	0	0	0	0	0	0	0	0	0	0	0	0	0	0	0	0	0	0	0	0
1218	0	0	187490	277540	0	0	170550	0	0	138920	0	0	0	0	0	0	0	0	0	0	0	0	0	0	0	0	0	0	0	0	0	0	0	0	0	0	0	0	0	0	0	0	0	0	0	0	0	0	0
1219	0	0	0	0	0	0	0	0	0	0	0	0	0	0	0	0	0	0	0	0	0	0	1209600	0	0	0	0	0	0	0	0	0	0	0	0	0	0	0	0	0	0	0	0	0	0	0	0	0	0
1220	0	0	0	0	0	0	0	0	0	0	0	0	0	0	0	0	0	0	0	0	0	0	0	0	0	0	0	0	0	0	0	0	0	0	0	0	0	0	0	0	0	0	0	0	0	0	0	1036800	0
1221	0	0	0	0	0	0	0	0	0	0	0	0	0	0	0	0	0	0	0	0	0	0	0	0	0	0	0	0	0	0	0	0	0	0	0	0	0	0	0	201180	0	0	445130	0	889940	0	1047000	3296000	1996500
1222	0	0	0	0	0	0	0	0	0	0	0	0	0	0	0	0	0	0	0	0	0	0	0	0	0	0	0	0	0	0	0	0	0	0	0	0	0	0	0	0	0	0	0	0	0	0	725710	736450	0
1223	0	0	0	0	0	0	0	0	258670	421160	0	570220	1036700	1581800	1203400	2867200	3154700	1190800	3638300	1539000	2235700	610350	1586900	311680	0	0	0	0	0	0	0	0	0	0	0	0	0	0	0	0	0	0	0	916720	0	0	1464600	3757700	5065700
1224	0	0	0	0	0	0	0	0	0	113010	0	0	277010	0	996990	737000	794390	743940	1780200	1102900	724580	753740	916310	0	0	0	0	0	0	0	0	0	0	0	0	0	0	0	0	0	0	0	0	0	0	0	544350	579150	734860
1225	0	239810	1124000	510360	448870	100800	0	0	0	0	0	0	0	880640	0	0	0	0	0	0	0	0	0	0	0	0	0	0	0	0	1615100	1783600	1461000	1995600	1195900	667880	679930	1954900	0	2288000	1324600	1672300	2121800	2614800	2936800	1873900	1940700	2865000	2589200
1226	117880	621960	366940	516170	1126900	555960	1420200	1121100	3305200	936890	3333200	5303800	4271400	8148000	2719200	5242400	13654000	4928000	4111300	5765400	5983900	1722800	6088300	6184200	7512400	3997800	6395100	8889000	10157000	6713800	21608000	10847000	14495000	11177000	6327100	11937000	8723200	4050100	8753500	6168900	7271400	17278000	27049000	15278000	14953000	9260300	11202000	15919000	15359000
1227	168830	731280	2402800	518190	2181000	2366200	2909200	6248200	7296200	9652400	10692000	11824000	8045100	4884400	3931900	5311400	1894700	1370300	2870500	2099800	5503300	5501800	6834800	3052400	6163100	8263300	6888600	8277900	11232000	4775300	10562000	14713000	18062000	13614000	9579100	20842000	28753000	26450000	32629000	20077000	28190000	28895000	28934000	27461000	19401000	17707000	26071000	43436000	43978000
1228	144820	1061900	826120	2040400	1359500	1194400	1100400	2106700	2497400	2868200	3033800	3827100	4367000	4857900	3223000	3899900	2630700	3322500	3265500	3841100	3044300	5826600	6220200	6798700	7388100	5682700	5466200	7529600	10808000	6636000	6251600	14405000	12682000	9395800	2254200	6801900	12146000	21794000	23193000	27326000	22360000	24264000	19446000	28100000	28886000	20167000	25982000	32928000	28725000
1229	221830	1275900	2085400	1839200	2070200	1969000	2703800	4192700	5426300	3991100	5092300	6422100	7022900	6094500	3636800	7426300	4359400	6375600	5670900	7823600	6249300	6790000	6719100	6710400	6424200	6980500	6474200	8437500	5548000	4778400	9158200	9698500	10883000	4996400	6191100	10557000	9292000	10207000	8409400	11360000	7984200	10831000	10444000	12945000	10877000	7736500	14345000	17459000	15032000
1230	870170	2875000	3777400	4428200	4040200	3611600	4989700	6228800	7846100	7200800	10269000	14826000	14106000	15312000	13542000	23202000	17048000	22713000	14117000	22197000	16986000	21113000	20500000	20760000	20916000	23042000	16010000	20807000	15361000	30008000	32416000	45811000	37710000	25780000	12383000	20033000	20527000	26921000	26464000	39140000	25020000	49149000	31693000	36330000	36939000	26865000	37066000	45244000	50856000
1231	2213400	7924900	11210000	8898800	8709300	14103000	10297000	16038000	28385000	26918000	36684000	41993000	47250000	42772000	35132000	76370000	58978000	54846000	44975000	63195000	58292000	60410000	71542000	64785000	69667000	46666000	34281000	61848000	71164000	77621000	174510000	216530000	129480000	79501000	37667000	85946000	92719000	78326000	71695000	154580000	112250000	117870000	107860000	152630000	150700000	80190000	115860000	147700000	170420000
1232	0	0	115620	0	172360	151740	0	223120	0	253300	194760	437680	1644100	727800	0	780830	0	0	267070	574720	0	1109800	784450	938010	1058000	0	1180600	2550800	1965000	765000	3993800	3292800	1827800	1477200	0	4183000	1342800	3242000	1468100	2725200	2520300	5970800	1148500	5259900	1285200	1419300	2711000	2478000	3930600
1233	232620	838290	1109500	1060600	2326900	1304100	1761000	4419500	3615700	3984500	15474000	16725000	13769000	6346900	21523000	31416000	7078900	17121000	9209400	10475000	13700000	10031000	20446000	9647800	12034000	9193100	18714000	24937000	7029800	8081100	85542000	104030000	32016000	12165000	7647800	18139000	28675000	26718000	12291000	36511000	37547000	15665000	33618000	49303000	34069000	34105000	25352000	51986000	59287000
1234	206210	557190	686440	1324900	1038000	1106400	2014300	2370500	1704200	1751000	1808200	4348000	3089000	3574800	1791600	3075800	1601800	3401300	3954200	3207800	2165800	5096100	5545600	5521500	5632400	6279000	10410000	11077000	10865000	10275000	20838000	18548000	24485000	20134000	12050000	23124000	35431000	33314000	20593000	16253000	12237000	13585000	9684000	14748000	9960800	8426000	9468300	15245000	13707000
1235	3287600	10139000	15893000	15137000	18813000	14114000	33311000	43630000	48565000	43195000	43135000	55966000	51609000	37923000	37358000	62692000	62374000	54787000	41837000	56639000	42341000	57522000	56777000	42310000	47905000	62338000	36966000	72098000	51662000	43839000	67052000	63627000	55346000	68840000	34436000	78261000	54820000	67163000	58609000	76246000	68121000	106920000	68308000	98774000	89505000	59142000	69066000	62205000	67326000
1236	0	303350	935420	296120	0	335740	0	0	809480	593130	753340	937460	933390	1126800	0	4516300	2954200	1071000	0	1860900	2181500	0	1399600	1806600	2243200	2475500	742960	1525000	1395000	6041500	1776500	2785900	5082900	3993700	813180	1352800	3181200	0	0	4909500	1584600	1490900	4985700	7413900	3903600	1730100	1300000	5243100	5419900
1237	0	121910	170810	106230	160710	318450	297560	374800	1007000	543320	2157600	3818900	2885400	9504800	4532600	6529300	6464800	674980	0	766050	630840	714750	909350	2280700	1142400	0	1390200	4337600	3578200	2625600	4130700	2117300	2218200	0	0	2743300	3018800	942610	2673900	3315700	2216200	3827400	1376600	1736300	1655200	1926300	1588700	3405200	3669200
1238	0	0	0	0	0	0	0	0	0	0	0	0	0	0	0	0	0	0	0	0	0	0	0	0	0	0	0	0	0	0	0	0	0	0	0	0	0	1251200	1265000	2600700	978490	1521300	0	0	0	0	0	883460	0
1239	0	0	0	674600	368670	0	713820	924130	1121300	1290700	0	0	0	0	0	0	0	0	0	0	0	0	0	0	0	0	0	0	0	0	0	0	0	0	0	0	0	0	0	1658400	0	0	0	0	0	0	0	0	2205800
1240	0	75403	102590	182890	0	118750	0	0	880110	223460	234500	0	395970	0	0	345130	295310	563860	0	0	0	0	474630	715990	791070	0	0	1300600	1489000	0	774340	0	975650	654320	0	1652900	1289200	458080	501510	1958200	0	1232100	506660	528680	443980	0	417110	492760	1453100
1241	0	0	0	0	0	0	0	0	0	0	0	0	0	0	0	0	0	0	0	0	0	0	0	0	0	0	0	0	0	0	0	0	0	0	0	0	0	0	0	0	0	0	0	0	0	0	0	0	2003300
1242	0	0	0	173690	236320	276880	383240	790270	377020	445660	628670	765720	1914300	1386700	461820	1196600	805510	1531700	1460100	1823800	1011100	1885900	2314300	1092900	2843100	1653700	1065800	3357600	2910200	2497000	5837200	3605400	1330500	2405200	0	0	2947300	0	0	0	3186800	2078300	1543100	0	0	0	0	2229000	4526700
1243	0	0	0	0	0	0	0	0	0	0	0	0	0	0	0	0	0	0	0	0	0	0	0	0	0	0	0	0	0	0	0	125580	0	0	0	0	0	0	0	0	0	0	0	0	0	0	166590	0	0
1244	0	0	172830	445350	419440	572800	0	619440	1386900	396640	0	788890	677650	1450700	0	2990500	0	2607900	0	0	774870	762280	1059100	3477100	4381300	5991600	2689100	3421600	3993600	3014600	5103500	4469300	7643600	1497500	0	0	1063000	0	1074100	1611600	5024500	6069700	6684700	6690900	1431000	5529000	4003300	3620900	7232400
1245	143440	934080	425860	565640	931750	549620	0	150260	0	0	0	0	0	0	0	0	0	1821700	1901400	2390300	2028500	2324300	0	2110700	2698400	4588800	1993300	3549100	2084800	2493000	6316400	11000000	7691600	2554900	2054700	3049200	5816900	5730600	3243000	7653100	5176900	4319800	9338300	5396700	4335500	5063700	1009700	20402000	22733000
1246	0	0	0	0	0	0	0	0	0	0	0	0	0	0	0	0	0	0	0	0	0	0	0	0	0	0	0	0	0	0	423430	0	0	0	0	1410600	0	0	2412900	1166500	903720	1576400	1526900	3862600	2494600	1864400	5491300	2361800	3623300
1247	0	0	0	0	0	0	0	0	0	0	0	0	0	0	0	0	0	0	0	0	0	0	0	0	0	0	0	0	0	0	573470	0	0	0	0	0	0	0	0	0	0	0	0	0	0	0	0	0	0
1248	0	1862000	1891400	2161300	1510600	1295100	1824400	2232300	8554200	2040500	1981000	0	1938700	0	0	0	0	4964800	6500900	2513300	0	0	0	0	0	0	0	0	0	0	0	0	0	0	0	0	0	0	0	0	0	0	0	0	0	3326500	4325800	5382000	0
1249	1132200	1951800	1655400	919920	1119500	820850	629740	748160	1491500	1563000	0	0	0	0	0	0	0	0	0	0	0	0	0	0	0	0	0	2704300	2067900	0	0	0	0	0	0	0	0	0	0	0	0	0	0	0	0	0	0	0	4049500
1250	0	0	0	0	0	0	0	0	0	0	0	0	0	0	0	0	0	0	0	0	0	0	0	0	0	0	0	0	0	0	0	0	0	0	0	0	0	0	0	0	0	0	0	0	0	0	0	0	1013100
1251	0	0	0	0	0	0	0	0	0	0	0	0	0	0	0	0	0	0	0	0	0	0	0	0	0	0	0	0	0	0	0	0	0	0	0	0	0	0	0	0	0	0	0	0	0	0	0	0	0
1252	0	0	125430	171910	153630	0	0	0	0	194640	284050	378500	440100	0	0	0	0	0	0	0	0	0	0	584060	0	0	0	1498000	1045900	1433600	1671000	2550600	406160	0	1524400	4073300	1640800	744130	820570	936620	1629000	1694900	123030	1800800	1397500	972750	0	5202500	1244500
1253	0	0	0	0	0	0	0	0	0	0	0	0	0	0	0	0	0	0	0	0	0	0	0	0	0	0	0	0	0	0	0	0	0	0	0	0	0	0	0	0	0	0	0	0	0	0	0	0	0
1254	0	0	0	0	0	0	0	0	0	0	0	0	0	0	0	0	0	0	0	0	0	0	0	0	0	0	0	0	0	0	0	0	0	0	0	0	0	0	0	0	0	0	0	0	0	0	0	0	0
1255	0	0	0	0	0	0	0	0	0	0	0	0	0	0	0	0	0	0	0	0	0	0	0	0	0	0	0	0	0	0	0	0	0	0	0	0	0	0	0	0	0	0	0	0	0	0	0	0	0
1256	0	0	0	0	0	0	0	0	0	0	0	0	0	0	0	0	0	0	0	0	0	0	0	0	0	0	0	0	0	0	0	0	0	0	0	0	0	0	0	0	0	0	0	0	0	0	0	0	0
1257	0	0	0	0	0	0	0	0	0	0	0	0	0	0	0	0	0	0	0	0	0	0	0	0	0	0	0	0	0	0	0	0	0	0	0	0	0	0	0	0	0	0	0	0	0	0	0	0	0
1258	0	0	0	0	0	0	0	0	0	0	0	0	0	0	0	0	0	0	0	0	0	0	0	0	0	0	0	0	0	0	0	0	0	0	0	0	0	0	0	0	0	0	0	0	0	0	0	0	0
1259	0	111740	125890	151820	114500	223270	212070	325300	344020	391650	547230	0	0	0	0	0	0	0	0	0	0	0	501720	0	0	0	0	0	0	0	0	0	0	0	0	0	0	0	575860	0	0	0	0	0	0	0	0	0	0
1260	0	0	0	0	0	0	0	0	0	0	0	0	0	0	0	0	0	0	0	0	0	0	0	0	0	0	0	0	0	0	0	0	0	0	0	0	0	0	0	0	0	0	0	0	0	0	0	0	0
1261	0	0	0	0	0	0	0	268230	0	0	0	0	0	0	0	0	0	0	0	0	0	0	0	0	0	0	0	0	0	0	0	0	0	0	0	0	0	0	0	0	0	0	0	0	0	0	0	0	0
1262	0	0	0	0	0	0	0	0	0	0	0	0	0	0	0	0	0	0	0	0	0	0	0	0	0	0	0	0	0	0	0	0	0	0	0	0	0	0	0	0	0	0	0	0	0	0	0	0	0
1263	0	0	0	0	0	0	0	0	0	0	0	0	0	0	0	0	0	0	0	0	0	0	0	0	0	0	0	0	0	0	0	403070	0	0	0	0	0	0	0	0	0	0	0	0	0	0	0	0	497630
1264	0	0	0	0	0	0	0	0	0	0	0	0	0	0	0	0	0	0	0	0	0	0	0	0	0	0	0	0	0	0	0	0	0	0	0	0	0	0	0	0	0	0	0	0	0	0	0	0	455680
1265	0	0	0	0	0	0	0	0	0	0	0	0	0	0	0	0	0	0	0	0	0	0	0	0	0	0	0	0	0	0	0	0	0	0	0	0	0	0	0	0	0	0	0	0	0	0	0	0	831120
1266	0	0	0	0	92269	0	0	0	0	0	0	0	0	0	0	0	0	0	0	0	0	0	0	0	0	0	0	0	0	0	0	0	0	0	0	0	0	0	0	0	0	0	0	0	0	0	0	0	743050
1267	0	0	0	0	0	0	0	0	0	0	0	0	0	0	0	0	0	0	0	0	0	0	0	0	0	0	0	0	0	0	0	0	0	0	0	0	0	0	0	0	0	0	0	0	0	0	0	0	0
1268	0	0	0	0	0	0	0	0	0	0	0	0	0	0	0	0	0	0	0	0	0	0	0	0	0	0	0	0	0	0	0	0	0	0	0	0	0	0	0	0	0	0	0	376610	0	0	358760	0	0
1269	0	0	0	0	0	0	0	0	0	0	0	0	0	0	0	0	0	0	0	0	0	0	0	0	0	0	0	0	0	0	0	0	0	0	0	0	0	0	0	0	0	0	0	0	0	0	0	0	0
1270	0	0	0	0	0	0	0	0	0	0	0	0	0	0	0	0	0	0	0	0	0	0	0	0	0	0	0	0	0	0	0	0	0	0	0	0	0	0	0	0	0	0	0	0	0	0	0	0	0
1271	0	0	0	0	0	0	0	0	0	0	0	0	0	0	0	0	0	0	0	0	0	0	0	0	0	0	0	0	0	0	507970	0	0	0	0	0	0	0	0	0	0	0	0	0	0	0	0	0	0
1272	0	0	0	0	0	0	0	0	0	0	0	0	0	0	0	0	0	0	0	0	0	0	0	0	0	0	0	0	0	0	0	0	0	0	0	0	0	654840	0	0	0	0	187910	0	260920	153110	324590	476360	6042400
1273	0	0	0	0	0	0	0	0	0	0	0	0	0	0	0	0	0	0	0	0	0	0	0	0	0	0	0	0	0	0	0	0	0	0	0	0	0	0	0	0	0	0	0	0	0	0	0	0	645560
1274	0	0	0	0	0	0	0	0	0	0	0	0	0	0	0	0	0	0	0	0	0	0	0	0	0	0	0	0	0	0	0	0	0	0	0	0	0	0	0	0	0	0	0	0	0	0	0	0	0
1275	0	0	0	0	0	0	0	0	0	0	0	0	0	0	0	0	0	0	0	0	0	0	0	0	0	0	0	0	0	0	0	0	0	0	0	0	0	0	0	0	0	0	0	0	0	0	0	0	0
1276	0	0	0	0	0	0	0	0	0	0	0	0	0	0	0	0	0	0	0	0	0	0	0	0	0	0	0	0	0	0	0	0	0	0	0	0	0	0	0	0	0	0	0	0	0	0	0	505060	0
1277	0	0	0	0	0	0	0	0	0	0	0	0	0	0	0	0	0	0	0	0	0	0	0	0	0	0	0	0	0	0	0	0	0	0	0	0	0	0	0	0	0	0	0	0	0	0	0	0	0
1278	0	0	0	0	0	0	0	0	211250	238730	0	0	727380	894460	0	0	0	0	0	0	0	0	0	0	0	0	0	3474200	0	0	0	0	0	0	0	0	0	0	0	3064500	3680400	2357500	12169000	1975900	1663100	1718700	24234000	41140000	63877000
1279	0	0	0	0	0	0	0	0	0	0	0	0	0	0	0	0	0	0	0	0	0	0	0	0	0	0	0	0	0	0	0	0	0	0	0	0	0	0	0	0	0	0	0	0	0	0	0	0	0
1280	0	0	0	0	0	0	0	0	0	0	0	0	0	0	0	0	0	0	0	0	0	0	0	0	0	0	0	0	0	0	0	0	0	0	0	0	0	0	0	0	0	0	0	0	0	0	0	0	0
1281	0	0	0	0	0	0	0	0	0	0	0	0	0	0	0	0	0	0	0	0	0	0	0	0	0	0	0	0	0	0	0	0	0	0	0	0	0	0	0	0	0	0	0	0	0	0	0	0	1729900
1282	0	0	0	0	0	0	0	0	0	0	0	0	0	0	0	0	0	0	0	0	0	0	0	0	0	0	0	0	0	0	0	0	0	0	0	0	0	0	0	0	0	0	0	0	0	0	0	1917000	3161200
1283	0	0	0	0	0	0	0	0	0	0	0	0	0	1092400	0	0	0	0	0	0	1368600	0	0	0	0	0	0	0	0	0	0	0	0	0	0	1518000	0	1232100	1190900	0	0	0	0	0	2265500	1254700	1992000	2543200	1987000
1284	0	0	0	0	0	0	0	0	0	0	0	0	0	0	0	0	0	0	0	0	0	0	0	0	0	0	0	0	312930	0	0	536640	18510000	5344900	0	992790	0	1151300	3156900	872530	918620	879170	0	0	0	0	438140	3572600	3917500
1285	0	0	0	0	0	0	0	0	0	0	0	0	0	0	0	0	0	0	0	0	0	0	0	0	0	0	0	0	0	0	0	0	0	0	0	0	0	933180	858120	2058300	2075700	797930	560710	0	2616300	0	1847500	2588300	9526800
1286	0	0	0	0	0	0	0	0	0	0	0	0	0	0	0	0	0	0	0	722500	763980	0	0	0	0	4514600	0	0	0	0	3218300	3170500	0	0	0	0	0	0	0	0	8095800	8228500	0	0	1215700	0	12293000	54212000	91106000
1287	0	0	0	0	0	0	0	0	0	0	0	0	0	0	0	0	0	0	0	0	0	0	0	0	0	0	0	0	0	0	0	0	0	0	0	0	0	0	0	0	0	0	0	0	0	0	0	894550	1058900
1288	0	0	121070	107010	87309	0	0	0	319690	0	0	0	0	0	0	0	0	0	0	0	0	0	0	0	0	0	0	0	0	0	392580	0	0	0	0	0	693460	377150	0	955140	502170	801290	1073500	1206300	2010800	785390	4662400	6385500	13367000
1289	0	0	0	0	0	0	0	0	0	0	0	0	0	0	0	0	0	0	0	0	0	0	0	0	0	0	0	0	0	0	0	0	0	0	0	0	0	0	0	0	0	0	0	0	0	0	0	328520	1304900
1290	108540	458060	238230	175970	698850	500350	238250	218010	918740	190780	506840	483180	313000	0	0	923360	0	2059100	423390	500080	0	0	0	0	0	0	0	0	0	0	0	0	0	0	0	0	0	0	0	0	0	0	0	0	0	0	871060	1133700	3625400
1291	0	0	0	0	0	0	0	0	126070	0	0	0	0	0	0	0	0	0	0	516270	0	752000	569520	751860	696440	0	0	1589500	1146500	2010800	0	0	0	0	0	0	0	0	0	562220	0	0	0	0	0	0	0	0	1070000
1292	0	0	0	213670	0	0	0	0	0	0	0	0	0	0	0	0	0	0	0	0	0	0	0	0	0	0	0	0	0	0	0	0	0	0	0	0	0	1431300	1997500	0	1886600	3551500	3648900	4579400	7714300	0	7361800	19639000	3190300
1293	0	0	0	0	0	0	0	0	0	0	0	0	0	0	0	0	0	0	0	0	0	0	0	0	0	0	0	0	340180	0	635990	632630	285920	0	0	0	0	0	0	0	501470	0	0	0	0	0	0	885540	0
1294	0	0	0	0	0	0	0	0	0	0	0	0	0	0	0	0	0	0	0	0	0	0	0	0	0	0	0	0	0	0	0	0	0	0	0	0	0	0	0	0	0	0	0	0	0	0	0	0	0
1295	0	0	0	0	0	0	0	0	0	0	0	0	0	0	0	0	0	0	0	0	0	0	0	0	0	0	0	0	0	0	0	0	0	0	0	0	0	0	0	0	0	0	0	0	0	0	0	0	0
1296	0	0	0	0	0	0	0	0	0	0	0	0	0	0	0	0	0	0	0	0	0	0	0	0	0	0	0	0	0	0	0	0	0	0	0	0	0	0	0	0	0	0	0	0	0	0	0	0	0
1297	0	0	0	0	0	0	0	0	0	0	0	0	0	0	0	0	0	0	0	0	0	0	0	0	0	0	0	0	0	0	0	0	0	0	0	0	0	0	0	0	0	0	0	0	0	0	0	0	0
1298	0	158520	161390	606060	0	0	0	0	0	0	0	0	0	0	0	0	0	0	0	0	0	0	0	0	0	0	0	0	0	0	0	0	0	0	0	0	0	0	0	0	0	0	0	0	0	0	0	0	0
1299	0	0	0	0	0	0	0	0	0	0	0	0	0	0	0	0	0	0	0	0	0	0	0	0	0	0	0	0	0	0	0	0	0	0	0	0	0	0	0	0	0	0	0	0	0	0	0	0	0
1300	0	0	0	0	0	0	0	0	0	0	0	0	0	0	0	0	0	0	0	0	0	0	0	0	0	0	0	0	0	0	0	0	0	0	0	0	0	0	0	0	0	0	0	0	0	0	0	0	0
1301	0	0	0	0	0	0	0	0	0	404930	0	0	0	0	0	0	0	0	0	0	0	0	0	0	0	0	0	0	0	0	0	0	0	0	0	0	0	0	0	0	0	0	0	0	0	0	0	0	0
1302	0	0	0	0	0	0	0	0	0	0	0	0	0	0	0	0	0	0	0	0	0	0	0	0	0	0	0	0	0	0	0	0	0	0	0	0	0	0	0	0	0	0	0	0	0	0	0	0	0
1303	0	0	0	0	0	0	0	0	0	0	0	0	0	0	0	0	0	0	0	0	0	0	0	0	0	0	0	0	0	0	0	0	0	0	0	0	0	0	0	0	0	0	0	0	0	0	0	0	0
1304	0	95474	60855	147660	94480	160320	273840	362250	140050	179540	561330	246420	282390	0	0	162420	0	0	0	0	0	0	329620	0	0	0	0	0	0	0	0	0	0	0	51496	0	0	75040	0	0	93415	0	0	0	0	0	0	0	264640
1305	0	0	0	0	0	0	0	0	0	0	0	0	0	0	0	0	0	0	0	0	0	0	0	0	0	0	0	0	0	0	462640	0	339760	0	0	0	927800	946470	462700	854390	0	0	0	0	0	0	0	0	0
1306	0	0	0	0	0	0	0	0	0	0	0	0	1060000	1112100	0	0	0	0	0	0	0	0	0	0	0	0	0	0	0	0	0	0	0	0	0	0	0	0	0	0	0	0	0	0	0	0	0	0	0
1307	0	0	0	0	196460	0	485770	744580	654790	711940	468350	724980	549470	307660	510750	595270	692880	575920	0	0	0	0	0	0	0	0	352160	0	0	584040	0	0	0	0	0	0	0	0	0	0	0	0	0	0	0	0	0	0	0
1308	0	44993	57158	0	0	68182	55442	91470	77566	109800	217120	0	0	0	0	0	0	0	0	0	0	0	0	0	0	0	0	0	0	0	0	0	0	0	0	0	0	0	0	0	0	0	0	0	0	0	0	0	0
1309	0	0	0	0	0	0	0	0	0	0	0	0	0	0	0	0	0	0	0	0	0	0	0	0	0	0	0	0	0	0	0	0	0	0	0	0	0	0	0	0	0	0	0	0	0	0	0	0	0
1310	0	0	0	0	0	0	0	0	0	0	0	0	0	0	0	0	0	0	0	0	0	0	0	0	0	0	0	0	0	0	0	0	0	0	0	0	0	0	0	0	0	0	0	0	0	0	0	0	0
1311	0	0	0	0	0	0	0	0	0	0	0	0	0	0	0	0	0	0	0	0	0	0	0	0	0	0	0	0	0	0	0	0	0	0	0	0	0	0	0	0	0	0	0	0	0	0	0	0	0
1312	0	0	0	0	0	0	0	0	0	0	0	0	0	0	0	0	0	0	0	0	0	0	0	0	0	0	0	0	0	0	0	0	0	0	0	0	0	0	0	0	0	0	0	0	0	0	0	0	0
1313	0	0	0	0	0	0	0	0	0	0	0	0	0	0	0	0	0	0	0	0	0	0	0	0	0	0	0	0	0	0	0	0	0	0	0	0	0	0	449730	0	325070	0	0	0	0	0	0	0	0
1314	0	158290	222780	260870	262640	0	0	0	0	0	0	0	0	0	644870	0	0	0	0	0	0	0	0	0	0	0	0	0	0	0	0	0	0	0	0	0	0	0	0	0	0	0	0	0	0	0	0	0	0
1315	0	0	0	0	0	0	0	0	0	0	0	0	0	0	0	0	0	0	0	0	0	0	0	0	0	0	0	0	0	0	0	0	0	0	0	0	0	0	0	0	0	0	0	0	0	0	0	0	0
1316	0	0	0	0	0	0	0	0	0	0	0	0	0	0	0	0	0	0	0	0	0	0	0	0	0	0	0	0	0	0	0	0	0	0	0	0	0	0	0	0	0	0	0	0	0	0	0	0	0
1317	0	0	0	0	0	0	0	0	0	0	0	0	0	0	0	0	0	0	0	0	0	0	0	0	0	0	0	0	0	0	0	0	0	0	0	0	0	0	0	0	0	0	0	0	0	0	0	0	0
1318	0	0	0	0	0	0	0	0	0	0	0	0	0	0	0	0	0	0	0	0	0	0	0	0	0	0	0	0	0	0	0	0	0	0	0	0	0	0	0	0	0	0	0	0	0	0	0	0	0
1319	0	0	0	0	0	0	0	0	0	0	0	0	0	0	0	0	0	0	0	0	0	0	0	0	0	0	0	0	0	0	0	0	0	0	0	0	0	0	0	0	0	0	0	0	0	0	0	0	0
1320	0	0	0	0	0	0	0	0	0	0	0	0	0	0	0	0	0	0	0	0	0	0	0	0	0	0	0	0	0	0	0	0	0	0	0	0	0	0	0	0	0	0	0	0	0	0	0	0	0
1321	0	0	0	0	0	0	0	0	0	0	0	0	0	0	0	0	0	0	0	0	0	0	0	0	0	0	0	0	0	0	0	0	0	0	0	0	0	0	0	0	0	0	0	0	0	0	0	0	0
1322	0	0	0	0	0	0	0	0	0	0	0	0	0	0	0	0	0	0	0	0	0	0	0	0	0	0	0	0	0	0	0	0	0	0	0	0	0	0	0	0	0	0	0	0	0	0	0	0	0
1323	0	0	0	0	0	0	0	0	0	0	0	0	0	0	0	0	0	0	0	0	0	0	0	0	0	0	0	0	0	0	0	0	0	0	0	0	0	0	0	0	0	0	0	0	0	0	0	0	0
1324	0	0	0	0	0	0	0	0	0	0	0	0	0	0	0	0	0	0	0	0	0	0	0	0	0	0	0	0	0	0	0	0	0	0	0	0	0	0	0	0	0	0	0	0	0	0	0	0	0
1325	0	0	0	0	0	0	0	0	0	0	0	0	0	0	0	0	0	0	0	0	0	0	0	0	0	0	0	0	0	0	0	0	0	0	0	0	0	0	0	0	0	0	0	0	0	0	0	0	0
1326	0	0	0	0	0	0	0	0	0	0	0	0	0	0	0	0	0	0	0	0	0	0	0	0	0	0	0	0	0	0	0	0	0	0	0	0	0	0	0	0	0	0	0	0	0	0	0	0	0
1327	0	0	0	0	0	0	0	0	0	0	0	0	0	0	0	0	0	0	0	0	0	0	0	0	0	0	0	0	0	0	0	0	0	0	0	0	0	0	0	0	0	0	0	0	0	0	0	0	0
1328	0	0	0	0	0	0	0	0	0	0	0	0	0	0	0	0	0	0	0	0	0	0	0	0	0	0	0	0	0	0	0	0	0	0	0	0	0	0	0	0	0	0	0	0	0	0	0	0	0
1329	0	0	0	0	0	0	0	0	0	0	0	0	0	0	0	0	0	0	0	0	0	0	0	0	0	0	0	0	0	0	0	0	0	0	0	0	0	0	0	0	0	0	0	0	0	0	0	1699700	0
1330	0	0	0	0	0	0	0	0	0	0	0	0	0	0	0	0	0	0	0	0	0	0	0	0	0	0	0	0	0	0	0	0	0	0	0	0	0	0	0	0	0	0	0	0	0	0	0	0	0
1331	0	0	0	0	0	0	0	0	0	0	0	0	0	0	0	0	0	0	0	0	0	0	0	0	0	0	0	0	0	0	0	0	0	0	0	0	0	0	0	0	0	280030	579230	959350	816620	0	229030	0	0
1332	0	0	0	0	0	0	0	0	0	0	0	0	0	0	0	0	0	0	0	0	0	0	0	0	0	0	0	0	0	0	0	0	0	0	0	0	0	0	0	0	0	0	0	0	0	0	0	0	0
1333	0	0	0	0	0	0	0	0	0	0	0	0	0	0	0	0	0	0	0	0	0	0	0	0	0	0	0	0	0	0	0	0	0	0	0	0	0	0	0	0	0	0	0	0	0	0	0	0	0
1334	0	0	0	0	0	0	0	0	0	0	0	0	0	0	0	0	0	0	0	0	0	0	0	0	0	0	0	0	0	0	0	0	0	0	0	0	0	0	0	0	0	0	0	0	0	0	0	0	0
1335	0	0	0	0	0	0	0	0	136870	0	0	0	0	0	0	0	0	0	0	0	0	0	0	0	0	0	0	0	0	0	0	0	0	0	0	0	0	0	0	0	0	0	0	0	0	0	0	0	0
1336	0	0	0	0	0	0	0	0	0	0	0	0	0	0	0	0	0	0	0	0	0	0	0	0	0	0	0	0	0	0	0	0	0	0	0	0	0	0	0	0	0	0	0	0	0	0	0	0	0
1337	0	0	0	0	0	0	0	0	0	0	0	0	0	0	0	0	0	0	0	0	0	0	0	0	0	0	0	0	0	0	0	0	0	0	0	0	0	0	0	0	0	0	0	0	0	0	0	0	0
1338	0	0	0	0	0	0	0	0	0	0	0	0	0	0	0	0	0	0	0	0	0	0	0	0	0	0	0	0	0	0	0	0	0	0	0	0	0	0	0	0	0	0	0	0	0	0	0	0	0
1339	0	0	0	0	0	0	0	0	0	0	0	0	0	0	0	0	0	0	0	0	0	0	0	0	0	0	0	0	0	0	0	0	0	0	0	0	0	0	0	0	0	0	0	0	0	0	0	0	0
1340	0	0	0	0	0	0	0	0	0	0	0	0	0	0	0	0	0	0	0	0	0	0	0	0	0	0	0	0	0	0	0	0	0	0	0	0	0	0	0	0	0	0	0	0	0	0	0	0	0
1341	0	0	0	0	0	0	0	0	0	0	0	0	0	0	0	0	0	0	0	0	0	0	0	0	0	0	0	0	0	0	0	0	0	0	0	0	0	0	0	0	0	0	0	0	0	0	0	0	0
1342	0	0	0	0	0	0	0	0	0	0	0	0	0	0	0	0	0	0	0	0	0	0	0	0	0	0	0	0	0	0	0	0	0	0	0	0	0	0	0	0	0	0	0	0	0	0	0	0	0
1343	0	0	0	0	0	0	0	0	0	0	0	0	0	0	0	0	0	0	0	0	0	0	0	0	0	0	0	0	0	0	0	0	0	0	0	0	0	0	0	0	0	0	0	0	0	0	0	0	0
1344	0	0	0	0	0	0	0	0	0	0	0	0	0	0	0	0	0	0	0	0	0	0	0	0	0	0	0	0	0	0	0	0	0	0	0	0	0	0	0	0	0	0	0	0	0	0	0	0	0
1345	0	0	0	0	0	0	0	0	0	0	0	0	0	0	0	0	0	0	0	0	0	0	0	0	0	0	0	0	0	0	0	0	0	0	0	0	0	0	0	0	0	0	0	0	0	0	0	0	0
1346	0	0	0	0	0	0	0	0	0	0	0	0	0	0	0	0	0	0	0	0	0	0	0	0	0	0	0	0	0	0	0	0	0	0	0	0	0	0	0	0	0	0	0	0	0	0	0	0	0
1347	0	0	0	0	0	0	0	0	0	0	0	0	0	0	0	0	0	0	0	0	0	0	0	0	0	0	0	0	0	0	0	0	0	0	0	0	0	0	0	0	0	0	0	0	0	0	0	0	0
1348	0	0	0	0	0	0	0	0	0	0	0	0	0	0	0	0	0	0	0	0	0	0	0	0	0	0	0	0	0	0	0	0	0	0	0	0	0	0	0	0	0	0	0	0	0	0	0	0	0
1349	0	0	0	0	0	0	0	0	0	0	0	0	0	0	0	0	0	0	0	0	0	0	0	0	0	0	0	0	0	0	0	0	0	0	0	0	0	0	0	0	0	0	0	0	0	0	0	0	0
1350	0	0	0	0	0	0	0	0	0	0	0	0	0	0	0	0	0	0	0	0	0	0	0	0	0	0	0	0	0	0	0	0	0	0	0	0	0	0	0	0	0	0	0	0	0	0	0	0	0
1351	0	0	0	0	0	0	0	0	0	0	0	0	0	0	0	0	0	0	0	0	0	0	0	0	0	0	0	0	0	0	0	0	0	0	0	0	0	0	0	0	0	0	0	0	0	0	0	0	0
1352	0	0	0	0	0	0	0	0	0	0	0	0	0	0	0	0	0	0	0	0	0	0	0	0	0	0	0	0	0	0	0	0	0	0	0	0	0	0	0	0	0	0	0	0	0	0	0	0	0
1353	0	0	0	0	0	0	0	0	0	0	0	0	0	0	0	0	0	0	0	0	0	0	0	0	0	0	0	0	0	0	0	0	0	0	0	0	0	0	0	0	0	0	0	0	0	0	0	0	0
1354	0	0	0	0	0	0	0	0	0	0	0	0	0	0	0	0	0	0	0	0	0	0	0	0	0	0	0	0	0	0	0	0	0	0	0	0	0	0	0	0	0	0	0	0	0	0	0	0	0
1355	0	0	0	0	0	0	0	0	0	0	0	0	0	0	0	0	0	0	0	0	0	0	0	0	0	0	0	0	0	0	0	0	0	0	0	0	0	0	0	0	0	0	0	0	0	0	0	0	0
1356	0	0	0	0	0	0	0	0	294280	0	0	0	0	0	0	0	0	0	0	0	0	0	0	0	0	0	0	0	0	0	0	0	0	0	0	0	0	0	0	0	0	0	0	0	0	0	0	0	0
1357	0	0	0	0	164280	0	0	0	0	0	0	0	0	0	0	0	0	0	0	0	0	0	0	0	0	0	0	0	0	0	0	0	0	0	0	0	0	0	0	0	0	0	0	0	0	0	0	0	0
1358	0	0	0	0	0	0	0	702030	1295500	1778700	1008200	0	0	0	0	0	0	0	0	0	0	0	0	0	0	0	0	0	0	0	0	0	0	0	0	0	0	0	0	0	0	0	0	0	0	0	0	0	0
1359	0	0	0	371070	234220	0	0	0	0	0	0	0	0	0	0	0	0	0	0	0	0	0	0	0	0	0	0	0	0	0	0	0	0	0	0	0	0	0	0	0	0	0	0	1683900	0	0	0	0	0
1360	0	0	0	0	0	0	0	0	0	0	0	0	0	0	0	0	0	0	0	0	0	0	0	0	0	0	0	0	0	0	0	0	0	0	0	0	0	0	0	0	0	0	0	0	0	0	0	0	0
1361	0	60646	0	179890	0	0	224570	0	0	0	0	0	0	0	0	0	0	0	0	0	0	0	0	0	0	0	0	0	0	0	0	0	0	0	0	0	0	0	0	0	0	0	0	0	0	0	0	0	0
1362	0	0	0	0	0	0	0	0	0	0	0	0	0	0	0	0	0	0	0	0	0	0	0	0	0	0	0	0	0	0	0	0	0	0	0	0	0	0	0	0	0	0	0	0	0	0	0	1332700	2053700
1363	0	0	0	0	0	0	0	0	0	0	0	0	0	0	0	0	0	0	0	0	0	0	0	0	0	0	0	0	0	0	0	0	0	0	0	0	0	0	0	0	0	0	0	0	0	0	0	329480	417900
1364	0	0	0	0	0	0	0	0	0	0	0	0	0	0	0	0	0	0	0	0	0	0	0	0	0	0	0	0	0	0	0	0	0	0	0	0	0	0	0	0	0	0	0	0	0	0	0	0	0
1365	0	0	0	0	0	0	0	0	0	0	0	0	0	0	0	0	0	0	0	0	0	0	0	0	0	0	0	0	0	0	0	0	14568000	7842800	0	0	0	1622100	2595000	4743900	2527400	0	0	0	0	0	0	0	0
1366	0	0	0	0	0	0	0	0	0	0	0	0	0	0	0	0	0	0	0	0	0	0	0	0	0	0	0	0	0	0	0	0	0	0	0	0	0	0	0	397320	0	0	0	0	0	0	0	0	0
1367	0	0	0	0	0	0	0	0	0	0	0	0	0	0	0	0	0	0	0	0	0	0	0	0	0	0	0	0	362260	0	0	0	0	0	0	0	0	0	0	684740	0	558230	0	0	0	0	0	0	0
1368	0	0	0	0	0	0	0	0	0	0	0	0	0	0	0	0	0	0	0	0	0	0	0	0	0	0	0	0	0	0	0	0	0	0	0	0	0	0	0	2173700	806360	3245400	0	0	0	0	0	0	1271700
1369	0	0	0	0	0	0	0	0	0	0	0	0	0	0	0	0	0	0	0	0	0	0	0	0	0	0	0	0	0	0	0	0	0	0	0	0	0	0	0	0	1579900	0	0	0	0	0	0	0	0
1370	0	0	0	0	0	0	0	0	0	0	0	0	0	0	0	0	0	0	0	0	0	0	0	0	0	0	0	0	0	0	0	0	0	0	0	0	0	0	0	0	1063100	0	0	0	0	0	0	0	0
1371	0	0	0	0	0	0	0	0	0	0	0	0	0	0	0	0	0	0	0	0	0	0	0	0	0	0	0	0	0	0	0	0	0	0	0	0	0	0	1064700	0	0	0	0	0	0	0	0	0	0
1372	0	541470	1624800	3573300	1416600	176890	891560	0	1100500	0	590270	1487100	3898400	0	0	0	0	0	0	0	0	0	0	0	0	0	0	0	0	0	0	0	0	0	0	1932300	4901700	0	0	0	0	0	0	0	0	0	0	0	0
1373	0	2355400	1903300	2856400	2345700	0	1339400	0	0	0	0	0	0	0	0	0	0	0	0	0	0	0	0	0	0	0	0	0	0	0	0	0	0	0	0	0	0	0	0	0	0	0	0	0	0	0	0	0	0
1374	1935700	8387100	10329000	9996200	9517500	5217400	6235300	4458500	3936800	2191200	1861400	780850	1205200	538200	0	0	0	771280	528630	0	0	0	1147100	0	0	0	0	0	0	0	0	0	2647600	0	0	0	0	0	0	0	0	0	0	0	0	0	1216400	4500000	5855900
1375	3995600	12614000	16363000	16167000	13769000	6601400	7335100	6449400	6023900	4519800	4963600	3917100	3993100	802400	1055700	1663400	1276600	779420	1501900	2777500	2025400	2663000	843450	785290	2431300	0	777640	1390400	405150	1168800	817310	2196400	0	0	1417600	4915300	515770	0	0	641090	590080	0	822110	0	469100	0	1610500	1362100	2123100
1376	845650	5849400	6056400	7889600	5302700	1862100	1472300	1598400	752610	795930	823730	1043400	1053800	0	0	0	0	0	0	0	0	0	0	0	0	0	0	0	835450	0	0	0	0	0	0	4814800	0	0	0	0	0	0	0	0	0	0	0	0	0
1377	0	0	0	0	0	0	0	0	0	0	0	0	0	0	0	0	0	0	0	845930	0	835100	0	271540	0	0	0	0	0	0	0	0	0	0	0	0	0	0	0	0	0	0	0	0	0	0	0	0	0
1378	0	0	0	0	0	0	0	0	0	0	0	0	0	0	0	0	0	0	0	0	0	0	0	0	0	0	0	0	0	0	0	0	0	0	0	0	0	0	0	0	0	0	0	0	0	0	624430	0	0
1379	0	0	0	0	0	0	0	0	0	0	0	0	0	0	0	0	0	0	0	0	0	0	0	0	0	0	0	0	0	0	0	0	0	0	0	0	0	0	0	0	0	0	0	0	0	0	0	0	0
1380	0	0	0	0	0	0	0	0	0	0	0	0	0	0	0	0	0	0	0	0	0	0	0	0	0	0	0	0	0	0	0	0	0	0	0	0	0	0	0	0	0	0	0	0	0	0	0	0	0
1381	0	0	0	0	0	0	0	0	0	0	0	0	0	0	0	0	0	0	0	0	0	0	0	0	0	0	0	0	0	0	0	0	0	0	0	0	0	0	0	0	0	0	0	0	0	0	0	0	0
1382	0	0	0	0	0	0	0	0	0	0	0	0	0	0	0	0	0	0	0	0	0	0	0	0	0	0	0	0	0	0	0	0	0	0	0	0	0	0	0	0	0	0	0	0	0	0	0	0	873730
1383	0	0	0	0	0	0	0	0	0	0	0	0	0	0	0	0	0	0	0	0	0	0	0	0	0	0	0	0	0	0	0	0	0	0	0	0	0	0	0	0	0	0	0	0	0	0	0	0	0
1384	0	0	0	0	0	0	0	0	0	0	0	0	0	0	0	0	0	0	0	0	0	0	0	0	0	0	0	0	0	0	0	0	0	0	0	0	0	0	0	0	0	0	0	0	0	0	0	0	0
1385	0	0	0	0	0	0	0	0	0	0	0	0	0	0	0	0	0	0	0	0	0	0	0	0	0	0	0	0	0	0	0	0	0	0	0	0	0	0	0	0	0	0	0	0	0	0	0	0	0
1386	0	0	0	0	0	0	0	0	0	0	0	0	0	0	0	0	0	0	0	0	0	0	0	0	0	0	0	0	0	0	0	0	0	0	0	0	0	0	0	0	0	0	0	0	0	0	0	0	0
1387	0	0	0	0	0	0	0	388800	0	0	0	0	131000	0	0	0	0	0	0	0	0	0	0	0	0	0	0	0	0	0	0	354270	0	0	0	0	438410	0	0	839820	0	0	0	0	0	0	0	391630	362100
1388	1114100	0	0	0	0	0	0	0	0	0	0	0	0	0	0	0	0	0	0	0	0	0	0	0	0	0	0	0	0	0	0	0	0	0	0	0	0	0	0	0	0	0	0	0	0	0	0	6612300	0
1389	0	0	0	0	0	0	0	0	0	0	0	0	0	0	0	0	0	0	0	0	0	0	0	0	0	0	0	0	0	0	0	0	0	0	0	0	0	0	0	0	0	0	0	0	0	0	0	0	0
1390	0	0	0	0	0	0	0	0	0	0	0	0	0	0	0	0	0	0	0	0	0	0	0	0	0	0	0	0	0	0	0	0	0	0	0	0	0	0	0	0	0	0	0	0	0	0	0	0	0
1391	0	0	0	0	0	0	0	0	0	0	0	0	0	0	0	0	0	0	0	0	0	0	0	0	0	0	0	0	0	0	0	0	0	0	0	0	0	0	0	0	0	0	0	0	0	0	0	0	0
1392	0	112550	74630	0	0	0	0	0	0	0	0	0	0	0	0	0	0	0	0	0	0	0	0	0	0	0	0	0	0	0	0	0	0	0	0	0	0	0	0	0	0	0	0	0	0	0	0	0	0
[truncated: 10 more columns]
